# Supplementary material for: Parallel Optimization of Potency and Pharmacokinetics Leading to the Discovery of a Pyrrole Carboxamide ERK5 Kinase Domain Inhibitor
Source: PubMed Central journal article supplement (PMC9109144; doi:10.1021/acs.jmedchem.1c01756), 2022-04-25
Supplement: jm1c01756_si_001.pdf [file jm1c01756_si_001.pdf]

**Supporting Information: Parallel Optimisation of Potency and Pharmacokinetics Leading to the Discovery of a Pyrrole Carboxamide ERK5 Kinase Domain Inhibitor**

*Duncan C. Miller,<sup>a‡</sup> Tristan Reuillon,<sup>a‡</sup> Lauren Molyneux,<sup>a</sup> Timothy Blackburn,<sup>a</sup> Simon J. Cook,<sup>c</sup> Noel Edwards,<sup>b</sup> Jane A. Endicott,<sup>b</sup> Bernard T. Golding,<sup>a</sup> Roger J. Griffin,<sup>a‡</sup> Ian Hardcastle,<sup>a</sup> Suzannah J. Harnor,<sup>a</sup> Amy Heptinstall,<sup>a</sup> Pamela Lochhead,<sup>c</sup> Mathew P. Martin,<sup>b</sup> Nick C. Martin,<sup>a</sup> Stephanie Myers,<sup>a</sup> David R. Newell,<sup>b</sup> Richard A. Noble,<sup>b</sup> Nicole Phillips, Laurent Rigoreau,<sup>d</sup> Huw Thomas,<sup>b</sup> Julie A. Tucker,<sup>b</sup> Lan-Zhen Wang,<sup>b</sup> Michael J. Waring,<sup>a</sup> Ai-Ching Wong,<sup>e</sup> Stephen R. Wedge,<sup>b</sup> Martin E. M. Noble<sup>b</sup> and Celine Cano<sup>a\*</sup>*

- a. Cancer Research UK Newcastle Drug Discovery Unit, Newcastle University Centre for Cancer, School of Natural and Environmental Sciences, Bedson Building, Newcastle University, Newcastle upon Tyne, NE1 7RU, UK.
- b. Cancer Research UK Newcastle Drug Discovery Unit, Newcastle University Centre for Cancer, Paul O’Gorman Building, Medical School, Framlington Place, Newcastle upon Tyne, NE2 4HH, UK.
- c. Signalling Laboratory, The Babraham Institute, Babraham Research Campus, Cambridge, CB22 3AT, UK
- d. Cancer Research UK Therapeutic Discovery Laboratories, Jonas Webb Building, Babraham Campus, Babraham, Cambridgeshire CB22 3AT, UK
- e. Cancer Research UK Therapeutic Discovery Laboratories, London Bioscience Innovation Centre, 2 Royal College Street, London NW1 0NH, UK.

<sup>‡</sup> These authors contributed equally to the work.

<sup>†</sup> Corresponding author: C.C. Tel (44) 191 208 7060. E-mail: celine.cano@ncl.ac.uk.

<sup>‡</sup> Deceased 24 September 2014

## Table of Contents

|                                                                       |      |
|-----------------------------------------------------------------------|------|
| Figure S1: $^1\text{H}$ NMR spectrum of compound <b>32a</b> .....     | S-4  |
| Figure S2: HPLC purity assessment of compound <b>32a</b> .....        | S-5  |
| Figure S3: $^1\text{H}$ NMR spectrum of compound <b>32b</b> .....     | S-6  |
| Figure S4: HPLC purity assessment of compound <b>32b</b> .....        | S-7  |
| Figure S5: $^1\text{H}$ NMR spectrum of compound <b>32c</b> .....     | S-8  |
| Figure S6: $^{13}\text{C}$ NMR spectrum of compound <b>32c</b> .....  | S-9  |
| Figure S7: $^1\text{H}$ NMR spectrum of compound <b>32d</b> .....     | S-10 |
| Figure S8: $^{13}\text{C}$ NMR spectrum of compound <b>32d</b> .....  | S-11 |
| Figure S9: $^1\text{H}$ NMR spectrum of compound <b>32e</b> .....     | S-12 |
| Figure S10: $^{13}\text{C}$ NMR spectrum of compound <b>32e</b> ..... | S-13 |
| Figure S11: $^1\text{H}$ NMR spectrum of compound <b>32f</b> .....    | S-14 |
| Figure S12: $^{13}\text{C}$ NMR spectrum of compound <b>32f</b> ..... | S-15 |
| Figure S13: $^1\text{H}$ NMR spectrum of compound <b>32g</b> .....    | S-16 |
| Figure S14: $^{13}\text{C}$ NMR spectrum of compound <b>32g</b> ..... | S-17 |
| Figure S15: $^1\text{H}$ NMR spectrum of compound <b>32i</b> .....    | S-18 |
| Figure S16: $^1\text{H}$ NMR spectrum of compound <b>32k</b> .....    | S-19 |
| Figure S17: HPLC purity assessment of compound <b>32k</b> .....       | S-20 |
| Figure S18: $^1\text{H}$ NMR spectrum of compound <b>32l</b> .....    | S-21 |
| Figure S19: $^1\text{H}$ NMR spectrum of compound <b>32m</b> .....    | S-22 |
| Figure S20: $^1\text{H}$ NMR spectrum of compound <b>33f</b> .....    | S-23 |
| Figure S21: $^{13}\text{C}$ NMR spectrum of compound <b>33f</b> ..... | S-24 |
| Figure S22: HPLC purity assessment of compound <b>33f</b> .....       | S-25 |
| Figure S23: $^1\text{H}$ NMR spectrum of compound <b>33g</b> .....    | S-26 |
| Figure S24: $^1\text{H}$ NMR spectrum of compound <b>33h</b> .....    | S-27 |
| Figure S25: $^1\text{H}$ NMR spectrum of compound <b>33i</b> .....    | S-28 |
| Figure S26: $^{13}\text{C}$ NMR spectrum of compound <b>33i</b> ..... | S-29 |
| Figure S27: $^1\text{H}$ NMR spectrum of compound <b>33j</b> .....    | S-30 |
| Figure S28: $^{13}\text{C}$ NMR spectrum of compound <b>33j</b> ..... | S-31 |
| Figure S29: HPLC purity assessment of compound <b>33j</b> .....       | S-32 |
| Figure S30: $^1\text{H}$ NMR spectrum of compound <b>33k</b> .....    | S-33 |
| Figure S31: $^{13}\text{C}$ NMR spectrum of compound <b>33k</b> ..... | S-34 |
| Figure S32: HPLC purity assessment of compound <b>33k</b> .....       | S-35 |
| Figure S33: $^1\text{H}$ NMR spectrum of compound <b>34a</b> .....    | S-36 |

|                                                                                 |      |
|---------------------------------------------------------------------------------|------|
| Figure S34: <sup>1</sup> H NMR spectrum of compound <b>34b</b> .....            | S-37 |
| Figure S35: <sup>13</sup> C NMR spectrum of compound <b>34b</b> .....           | S-38 |
| Figure S36: HPLC purity assessment of compound <b>34b</b> .....                 | S-39 |
| Figure S37: <sup>1</sup> H NMR spectrum of compound <b>34c</b> .....            | S-40 |
| Figure S38: <sup>1</sup> H NMR spectrum of compound <b>34d</b> .....            | S-41 |
| Figure S39: <sup>13</sup> C NMR spectrum of compound <b>34d</b> .....           | S-42 |
| Figure S40: <sup>1</sup> H NMR spectrum of compound <b>34e</b> .....            | S-43 |
| Figure S41: <sup>13</sup> C NMR spectrum of compound <b>34e</b> .....           | S-44 |
| Figure S42: <sup>1</sup> H NMR spectrum of compound <b>34h</b> .....            | S-45 |
| Figure S43: <sup>13</sup> C NMR spectrum of compound <b>34h</b> .....           | S-46 |
| Figure S44: HPLC purity assessment of compound <b>34b</b> .....                 | S-47 |
| Figure S45: <sup>1</sup> H NMR spectrum of compound <b>34i</b> .....            | S-48 |
| Figure S46: <sup>13</sup> C NMR spectrum of compound <b>34i</b> .....           | S-49 |
| Figure S47: <sup>1</sup> H NMR spectrum of compound <b>34j</b> .....            | S-50 |
| Figure S48: <sup>13</sup> C NMR spectrum of compound <b>34j</b> .....           | S-51 |
| Figure S49: <sup>1</sup> H NMR spectrum of compound <b>34k</b> .....            | S-52 |
| Table S1: Kinome Selectivity Data for Compound <b>34b</b> .....                 | S-53 |
| Table S2: Kinome Selectivity (Kd) Data for Compound <b>34b</b> .....            | S-62 |
| Figure S50: Cellular dependency on MAPK7 (RNAi gene silencing, DepMap) .....    | S-63 |
| Figure S51: Quantification of p-ERK5 by Western blotting and densitometry ..... | S-64 |

Figure S1: <sup>1</sup>H NMR spectrum of compound **32a**

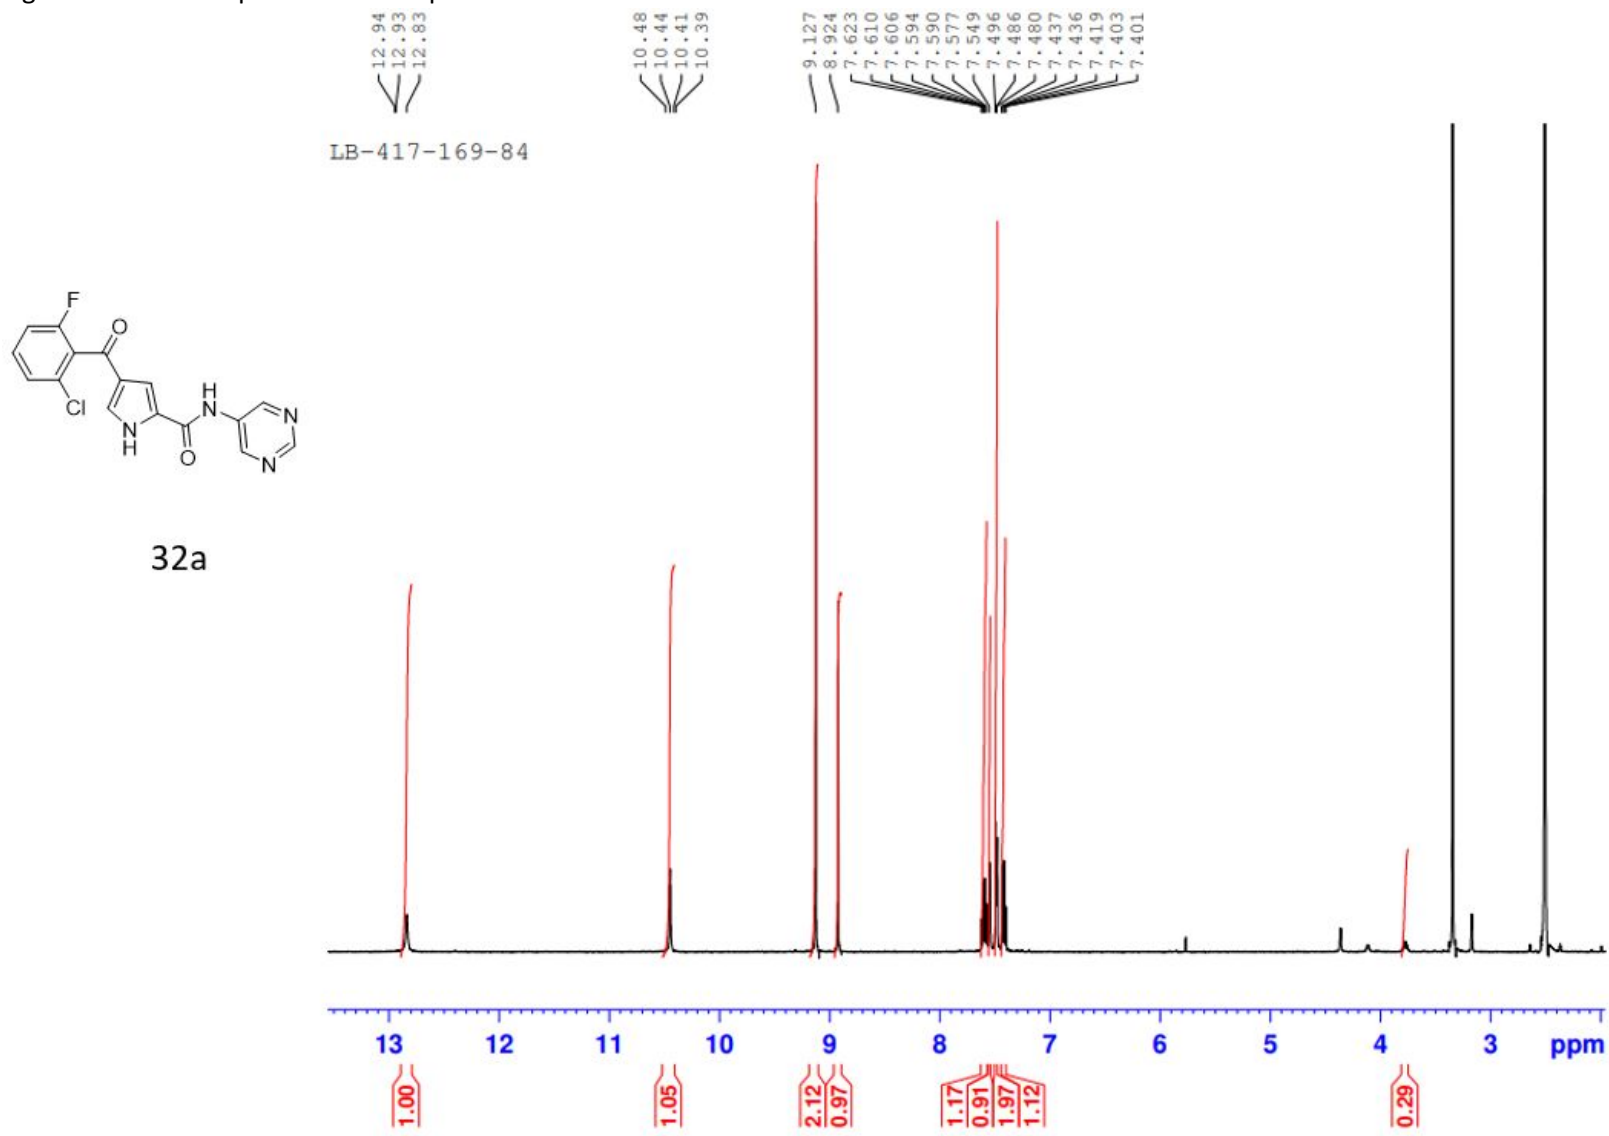

Figure S2: HPLC purity assessment of compound **32a**

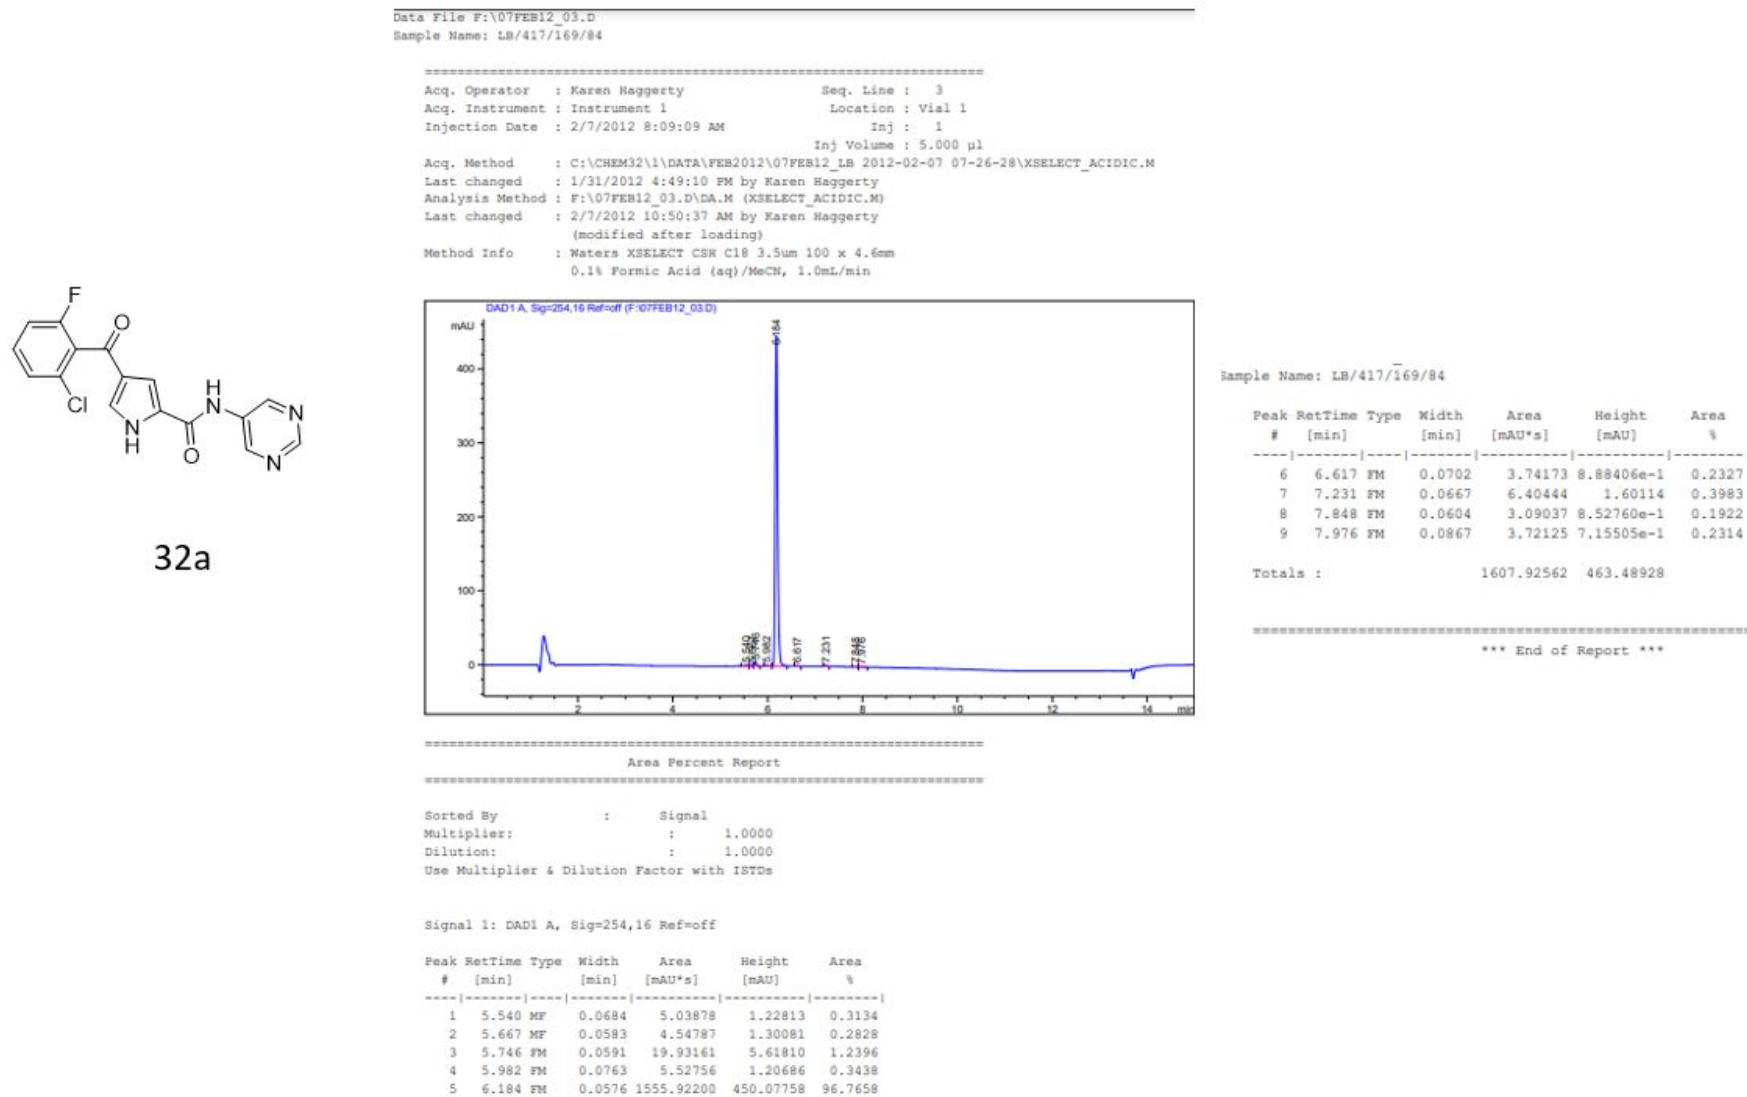

C4

Figure S3: <sup>1</sup>H NMR spectrum of compound **32b**

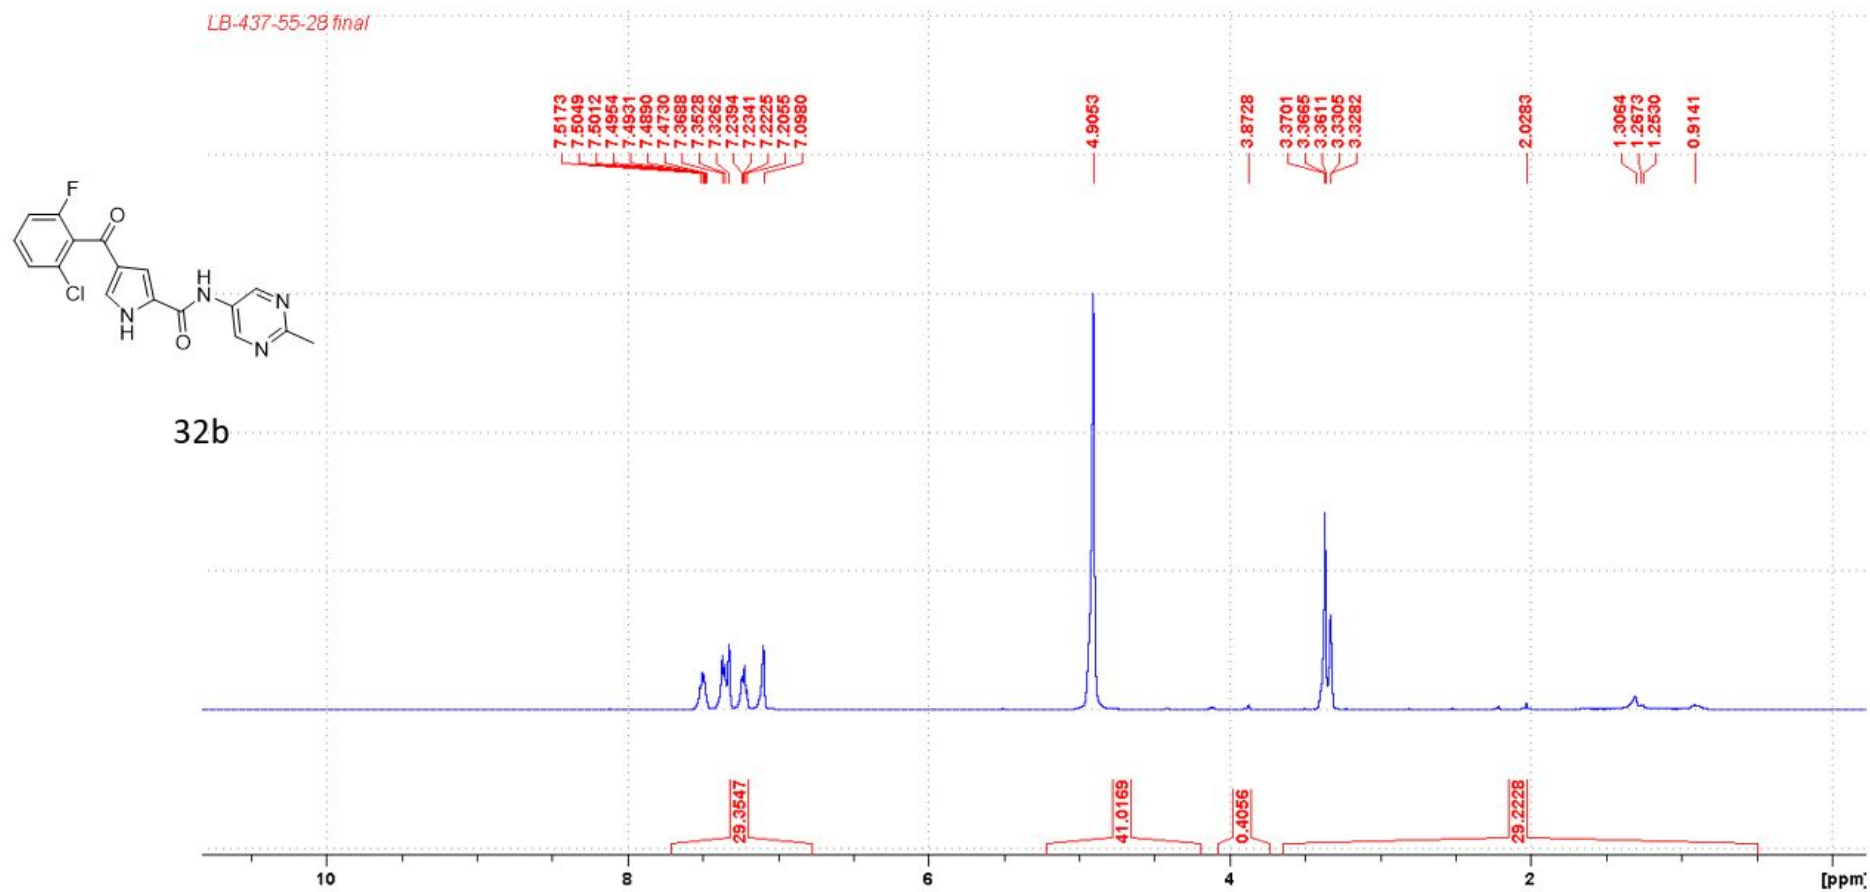

Figure S4: HPLC purity assessment of compound **32b**

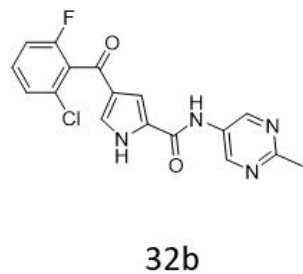

```

Data File F:\23MAY12_11.D
Sample Name: LB/437/55/28

=====
Acq. Operator   : Karen Haggerty           Seq. Line :    7
Acq. Instrument : Instrument 1              Location  : Vial 65
Injection Date  : 5/23/2012 11:35:43 AM    Inj       :    1
                                           Inj Volume: 5.000 µl
Different Inj Volume from Sequence !      Actual Inj Volume : 10.000 µl
Acq. Method    : C:\CHEM32\1\DATA\MAY2012\23MAY12_SMT_LB 2012-05-23 08-40-14\XSELECT_ACIDIC.M
Last changed   : 5/23/2012 8:40:21 AM by Karen Haggerty
Analysis Method : F:\23MAY12_11.D\DA.M (XSELECT_ACIDIC.M)
Last changed   : 5/23/2012 2:00:11 PM by Karen Haggerty
                (modified after loading)
Method Info    : Waters XSELECT CSR C18 3.5µm 100 x 4.6mm
                0.1% Formic Acid (aq)/MeCN, 1.0mL/min
    
```

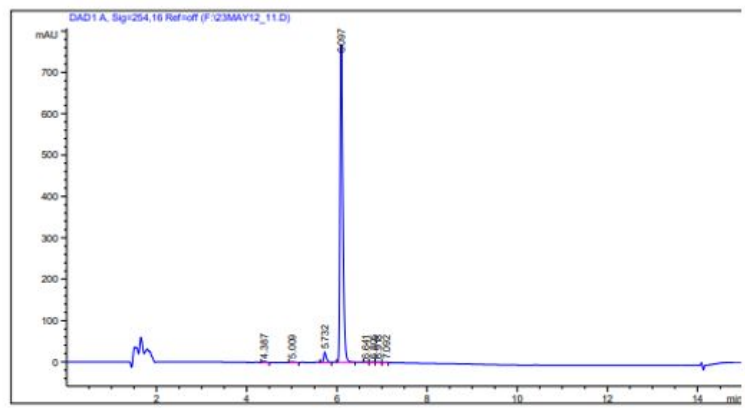

Sample Name: LB/437/55/28

| Peak #   | RetTime [min] | Type | Width [min] | Area [mAU*s] | Height [mAU] | Area %  |
|----------|---------------|------|-------------|--------------|--------------|---------|
| 4        | 6.097         | FM   | 0.0699      | 3236.33252   | 772.19928    | 95.4348 |
| 5        | 6.641         | FM   | 0.0832      | 7.20853      | 1.44415      | 0.2126  |
| 6        | 6.805         | FM   | 0.1067      | 9.30931      | 1.45399      | 0.2745  |
| 7        | 6.918         | FM   | 0.1028      | 9.30425      | 1.50831      | 0.2744  |
| 8        | 7.092         | FM   | 0.0889      | 8.06266      | 1.51183      | 0.2378  |
| Totals : |               |      |             | 3391.14472   | 807.16584    |         |

\*\*\* End of Report \*\*\*

```

=====
Area Percent Report
=====
Sorted By      :      Signal
Multiplier:    :      1.0000
Dilution:      :      1.0000
Use Multiplier & Dilution Factor with ISTDs

Signal 1: DAD1 A, Sig=254,16 Ref=off

Peak RetTime Type Width Area Height Area
# [min] ----- [min] [mAU*s] [mAU] %
-----
1  4.387 BB  0.0566 10.54312  2.88661  0.3109
2  5.009 BB  0.0692  7.75120  1.63698  0.2286
3  5.732 FM  0.0697 102.63313 24.52467  3.0265
    
```

Figure S5: <sup>1</sup>H NMR spectrum of compound **32c**

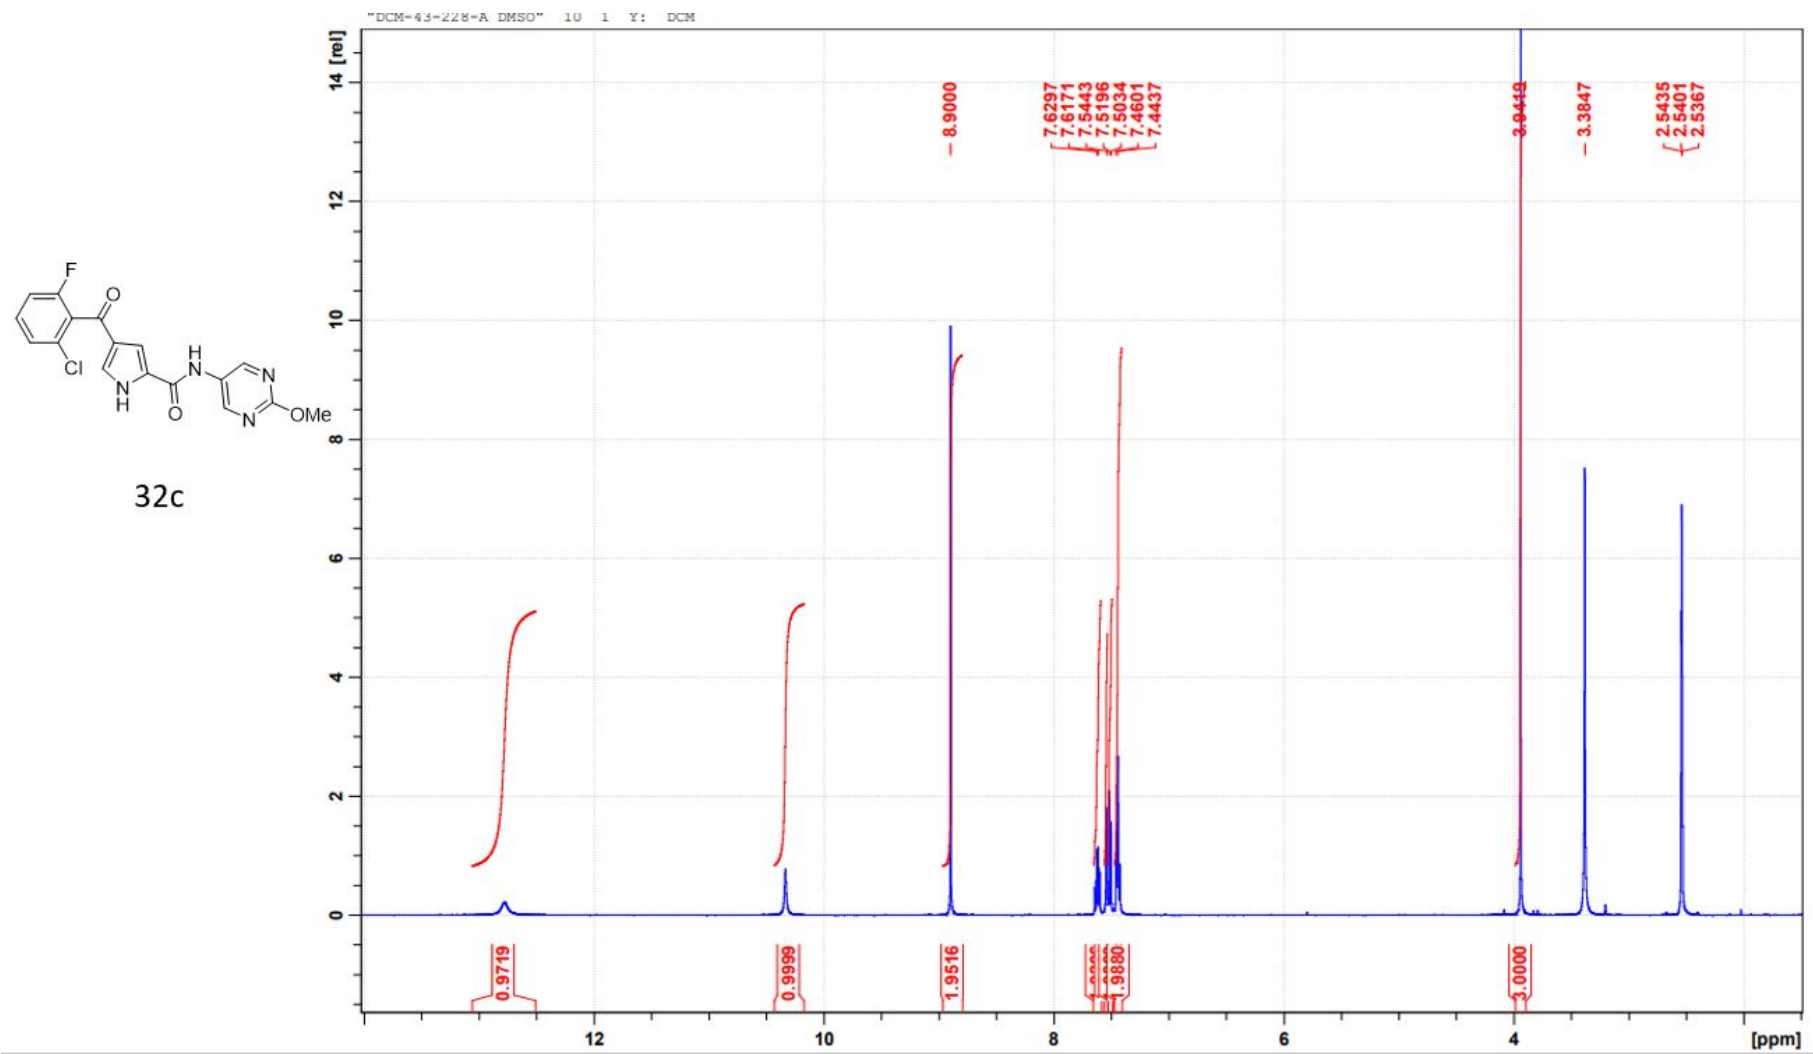



Figure S6: <sup>13</sup>C NMR spectrum of compound **32c**

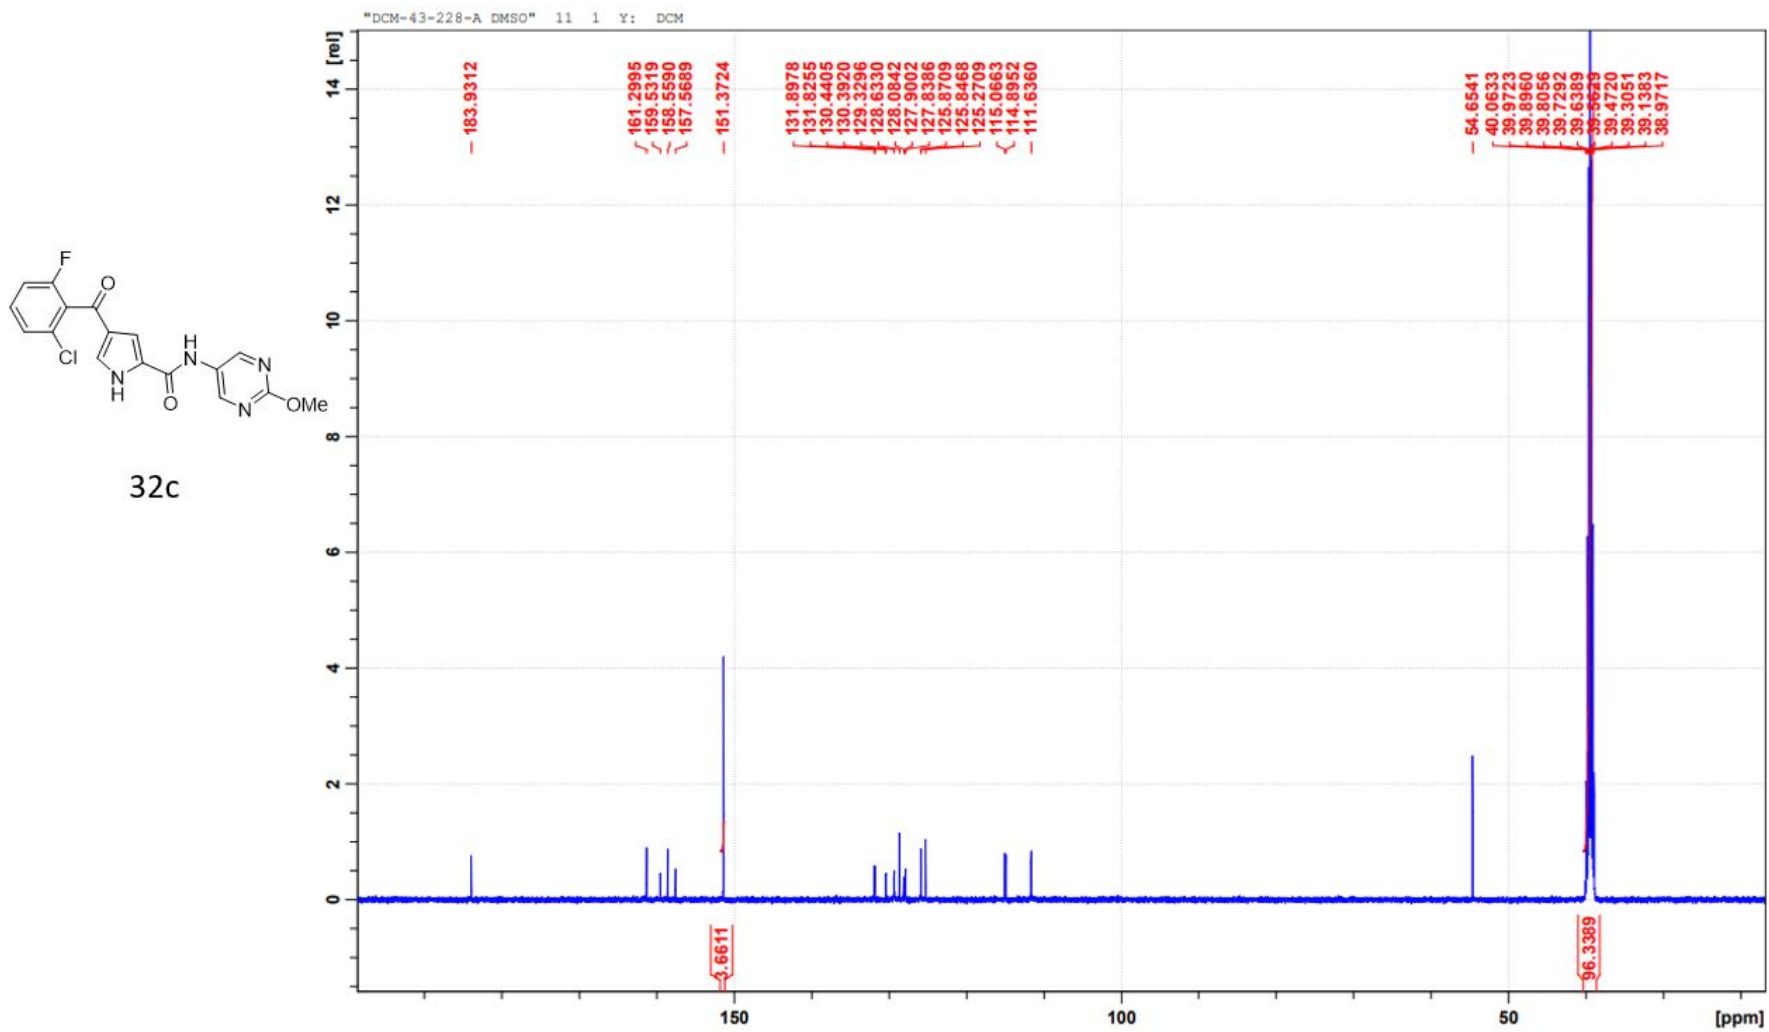

Figure S7: <sup>1</sup>H NMR spectrum of compound **32d**

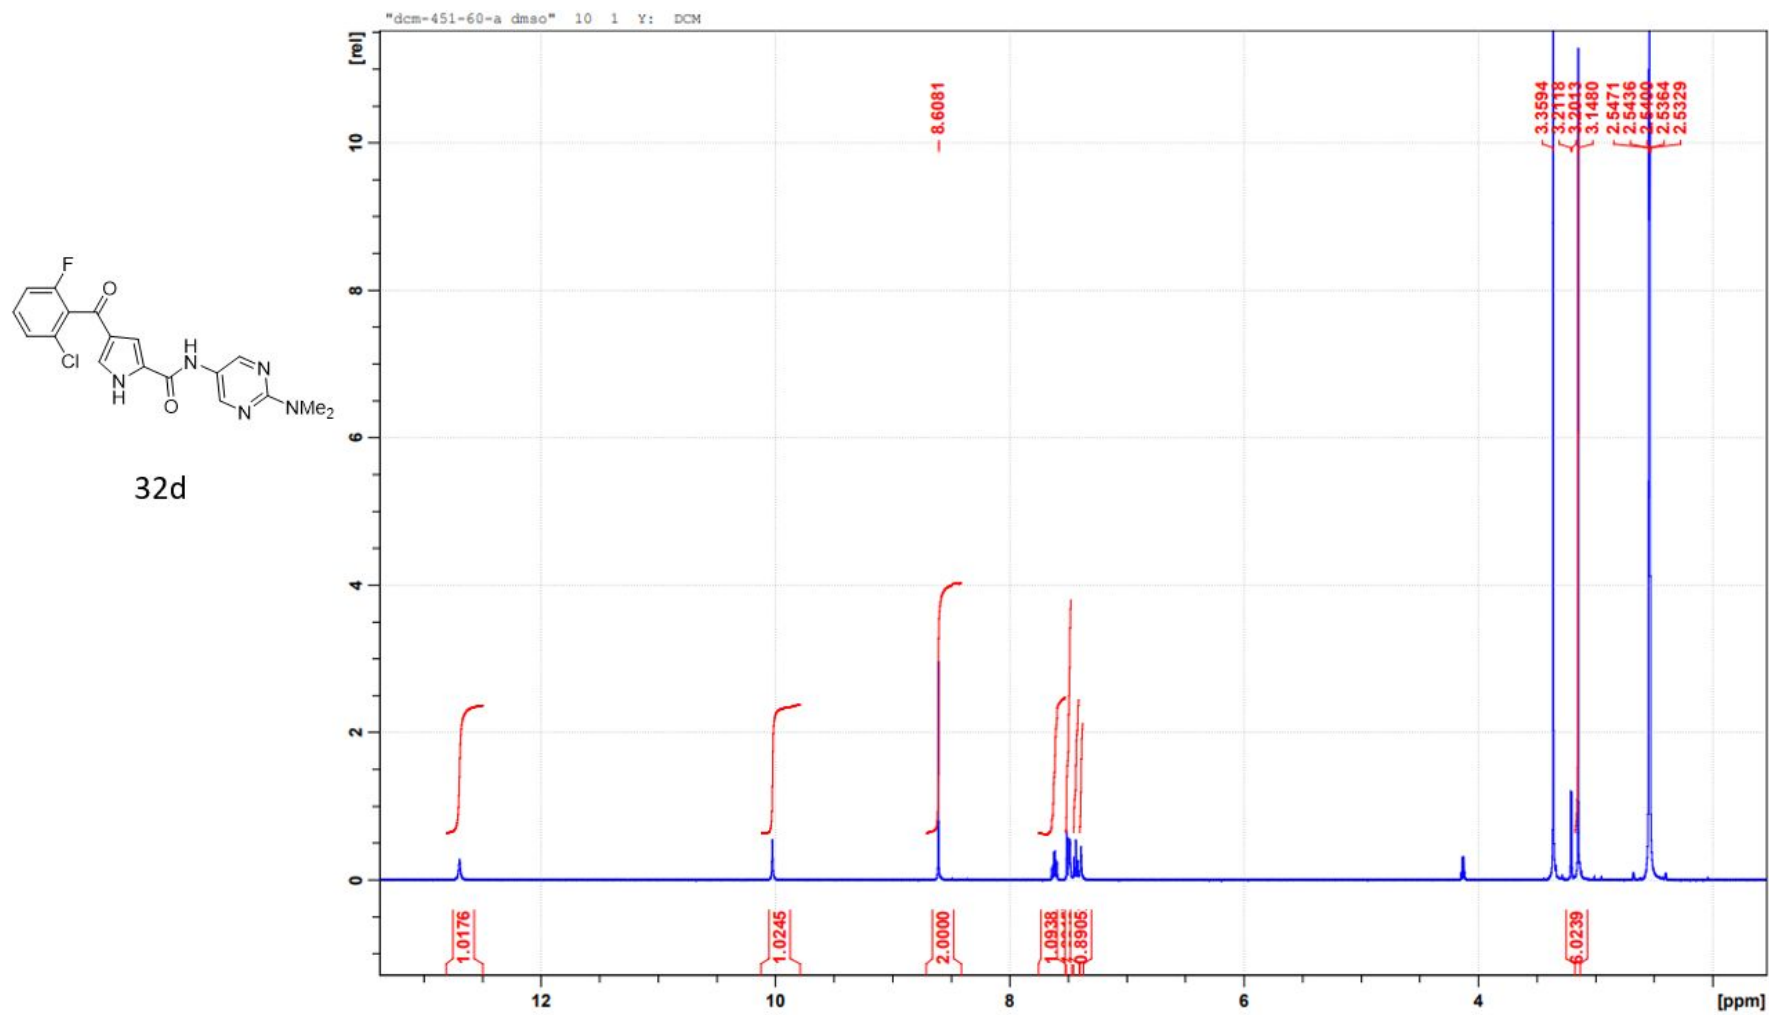

Figure S8:  $^{13}\text{C}$  NMR spectrum of compound **32d**

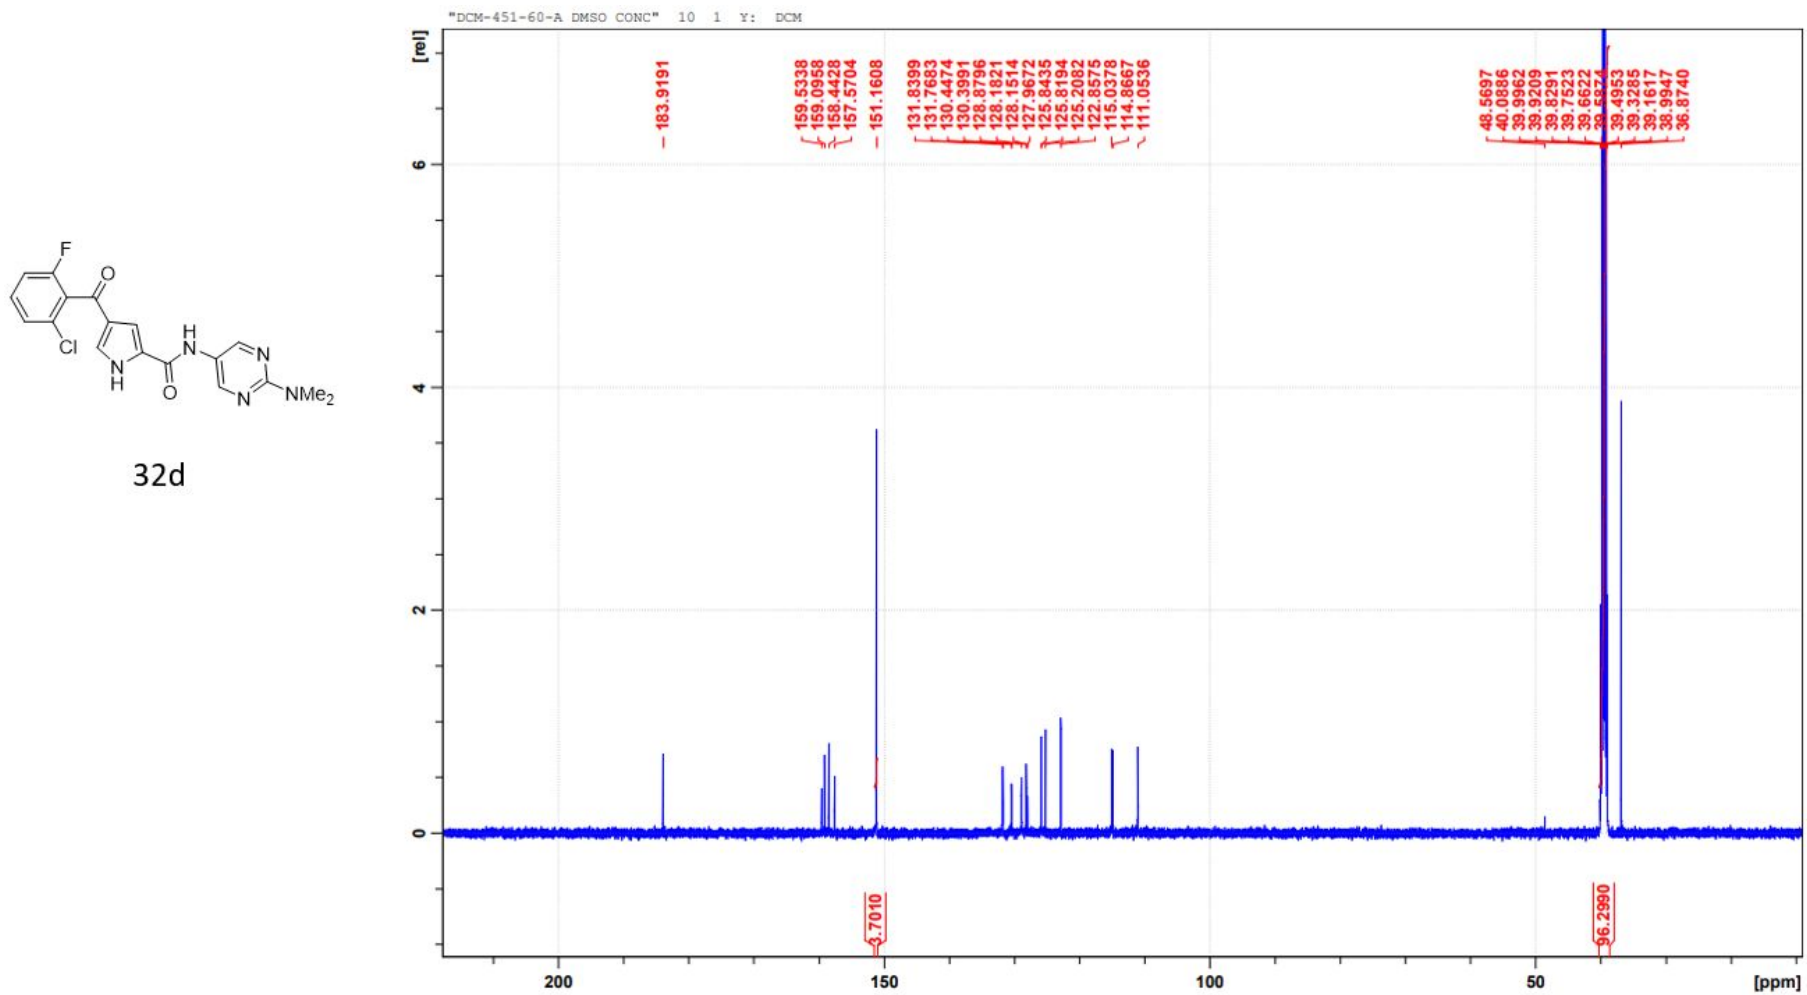

Figure S9: <sup>1</sup>H NMR spectrum of compound **32e**

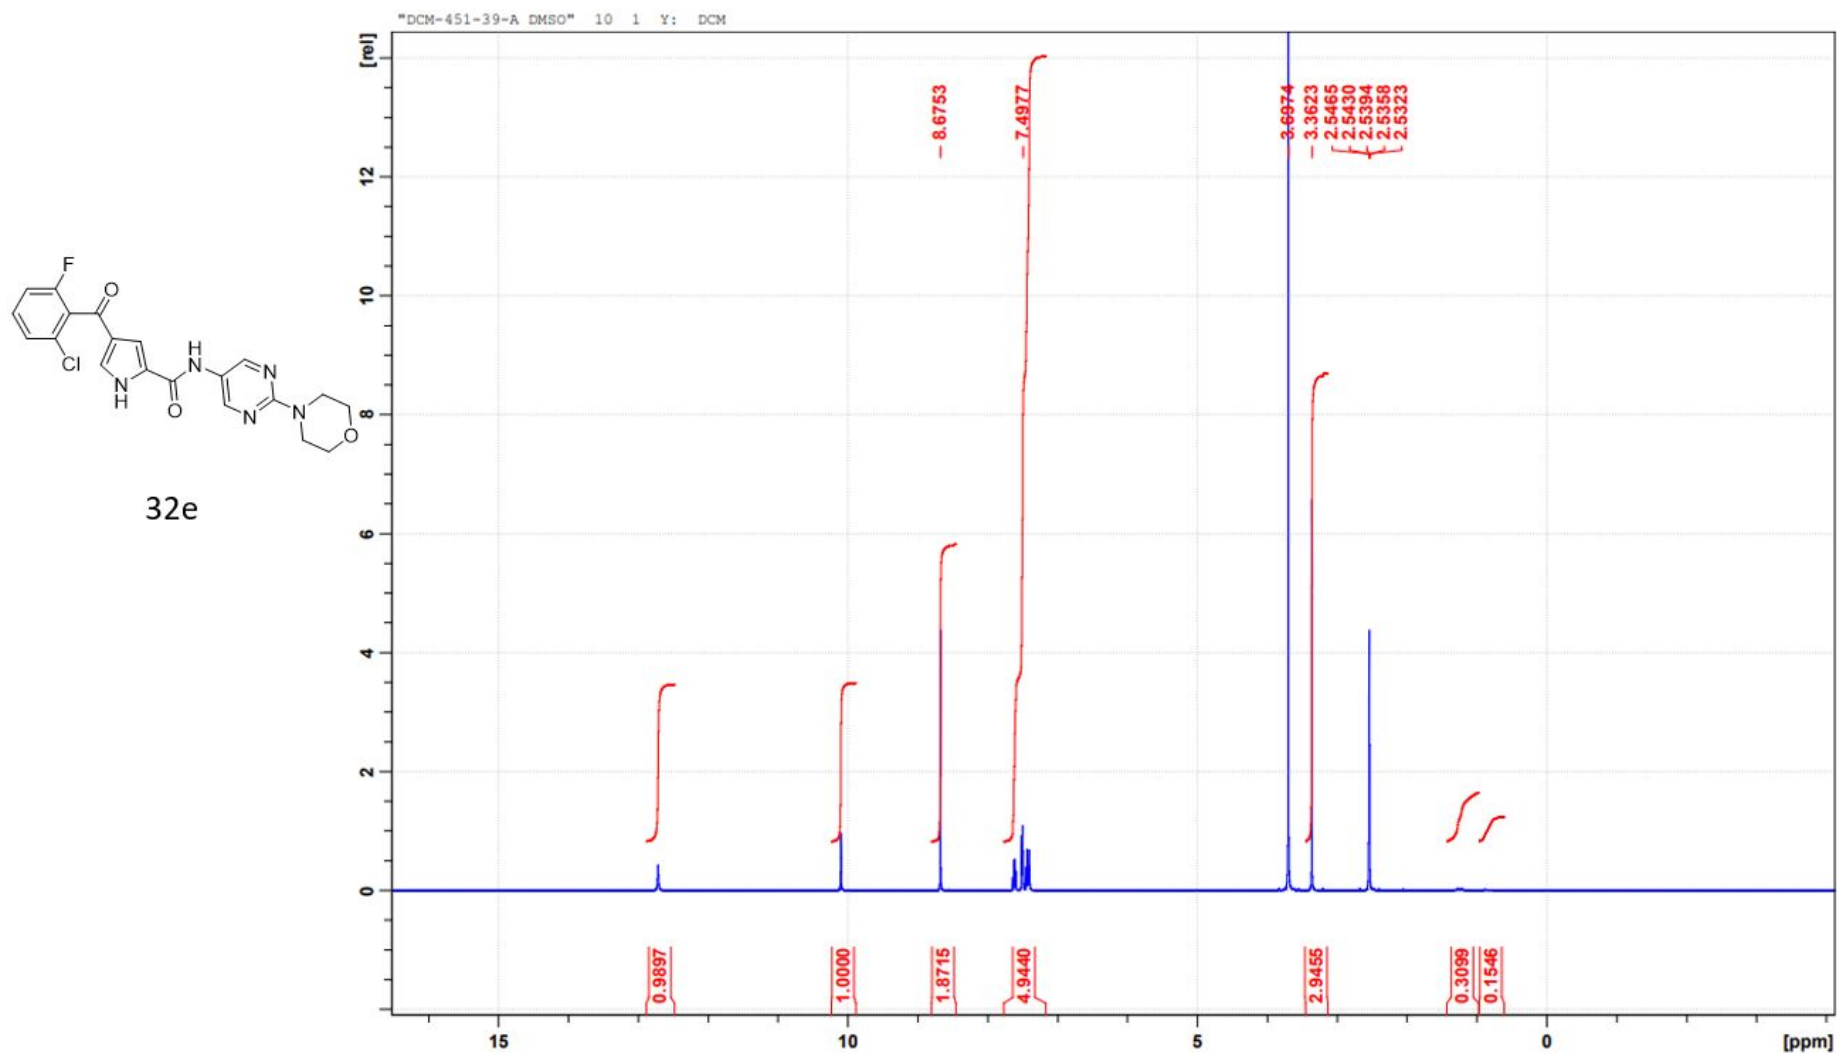

Figure S10: <sup>13</sup>C NMR spectrum of compound **32e**

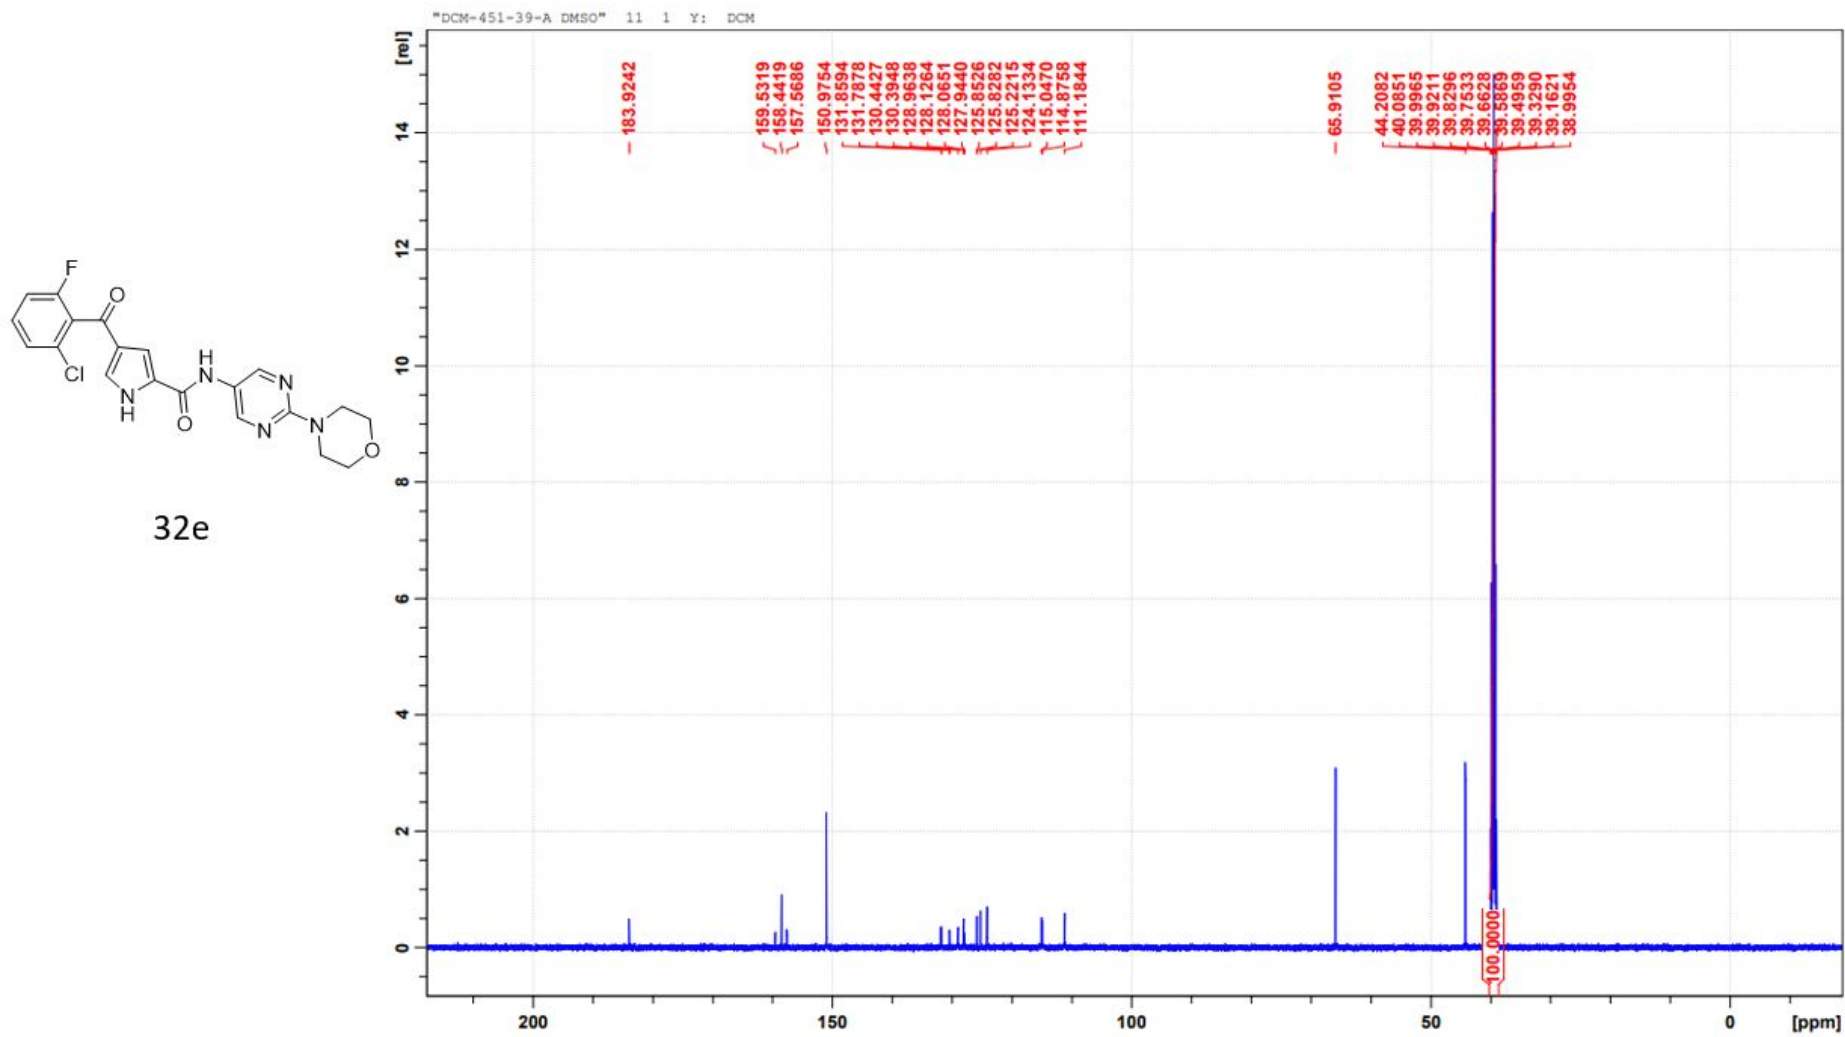

Figure S11: <sup>1</sup>H NMR spectrum of compound **32f**

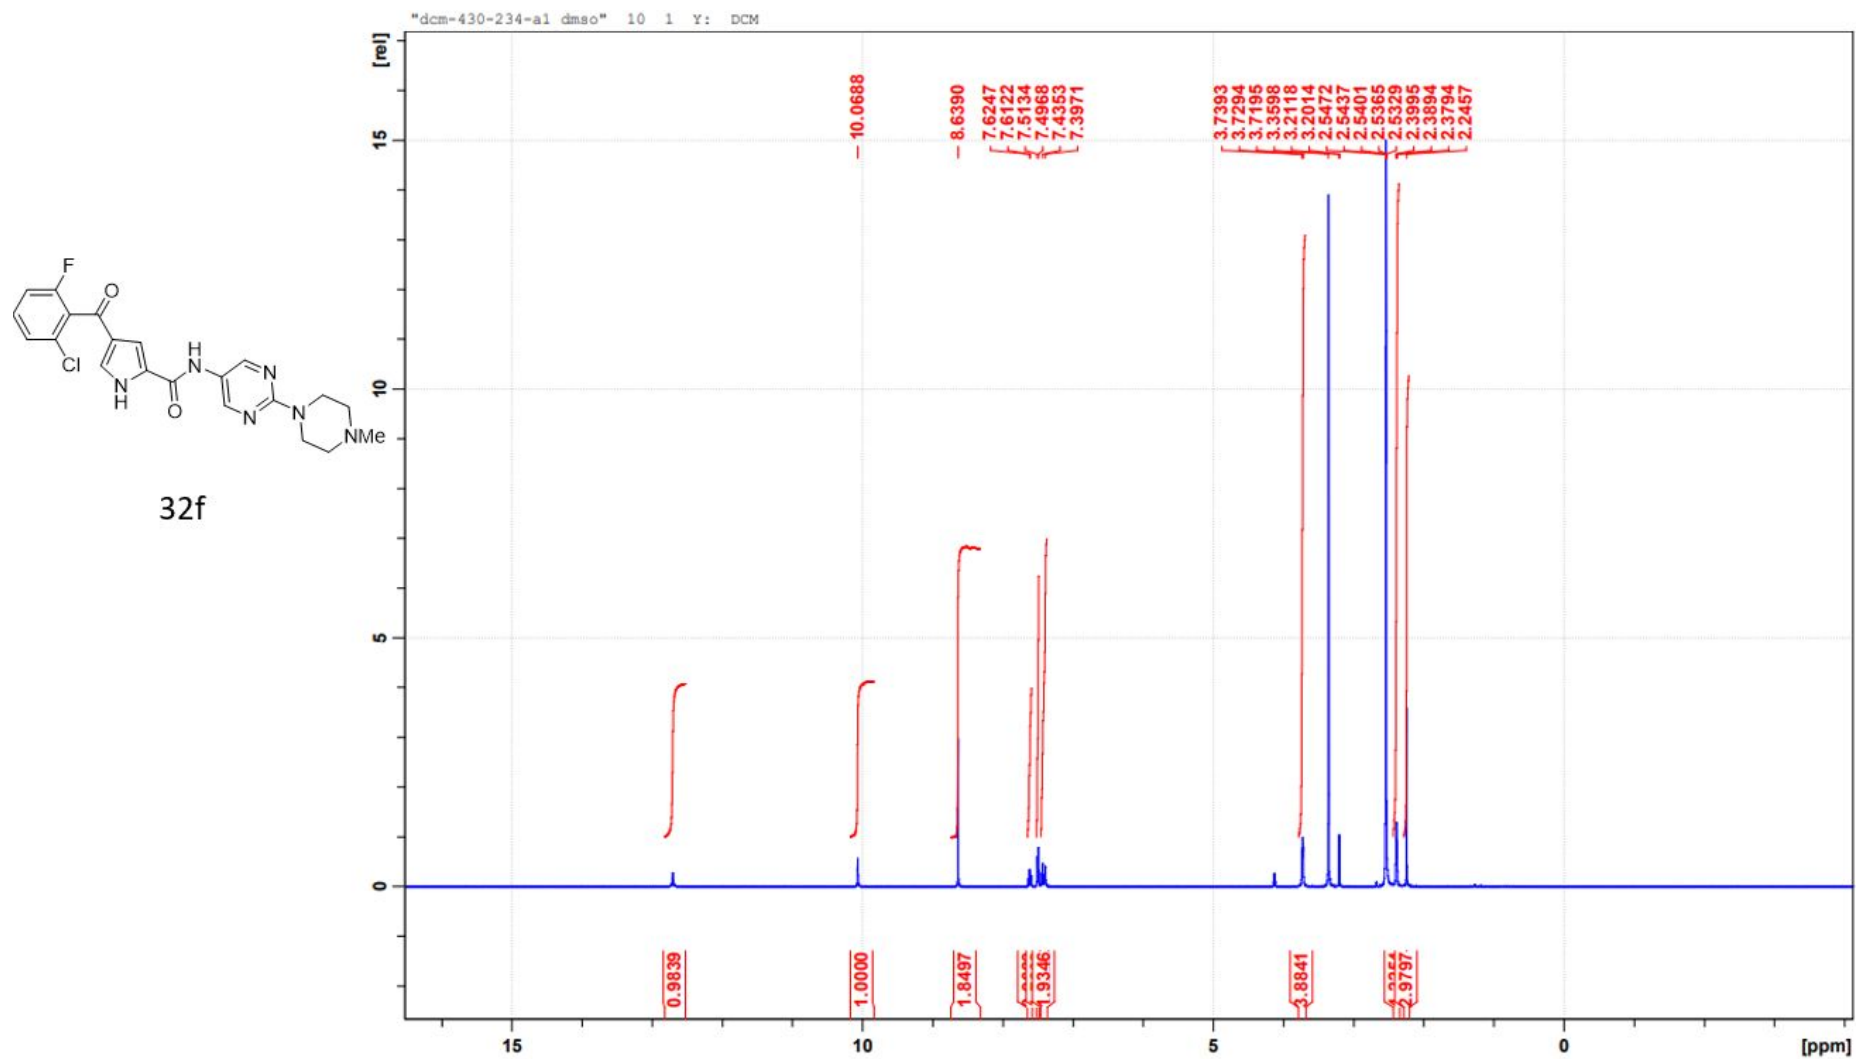

Figure S12: <sup>13</sup>C NMR spectrum of compound **32f**

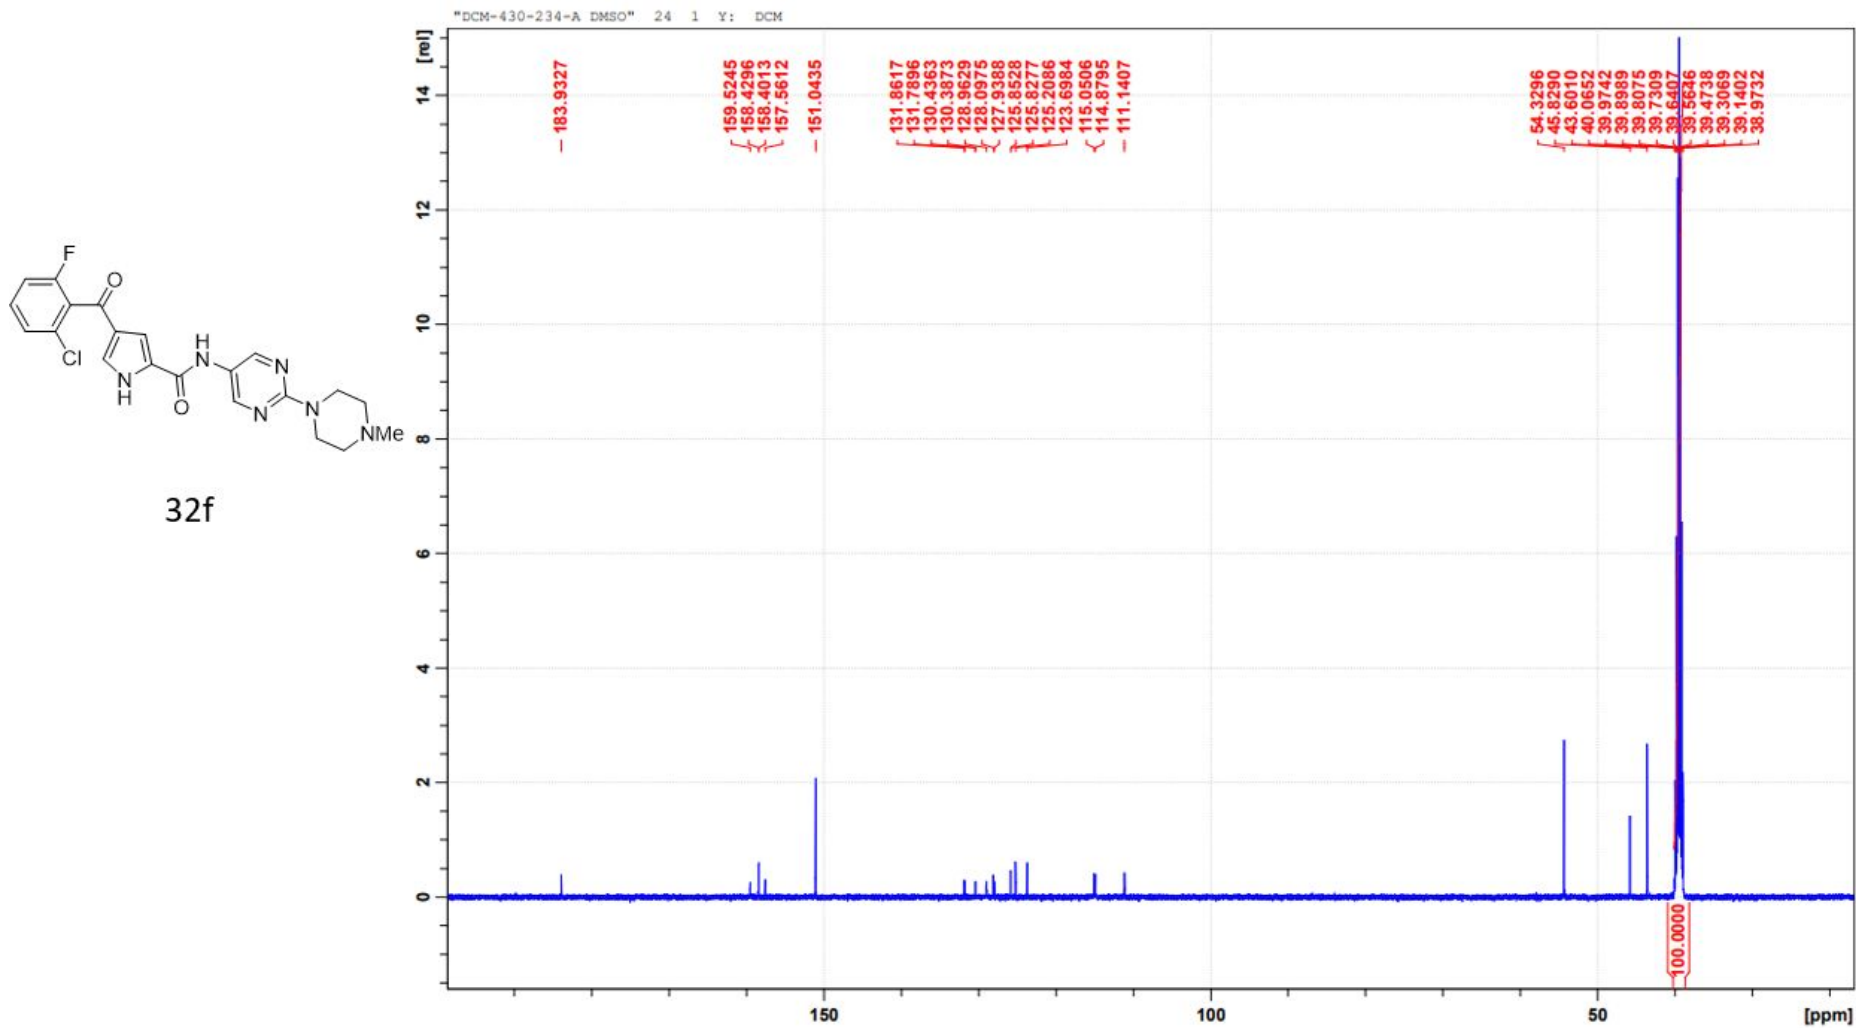

Figure S13: <sup>1</sup>H NMR spectrum of compound **32g**

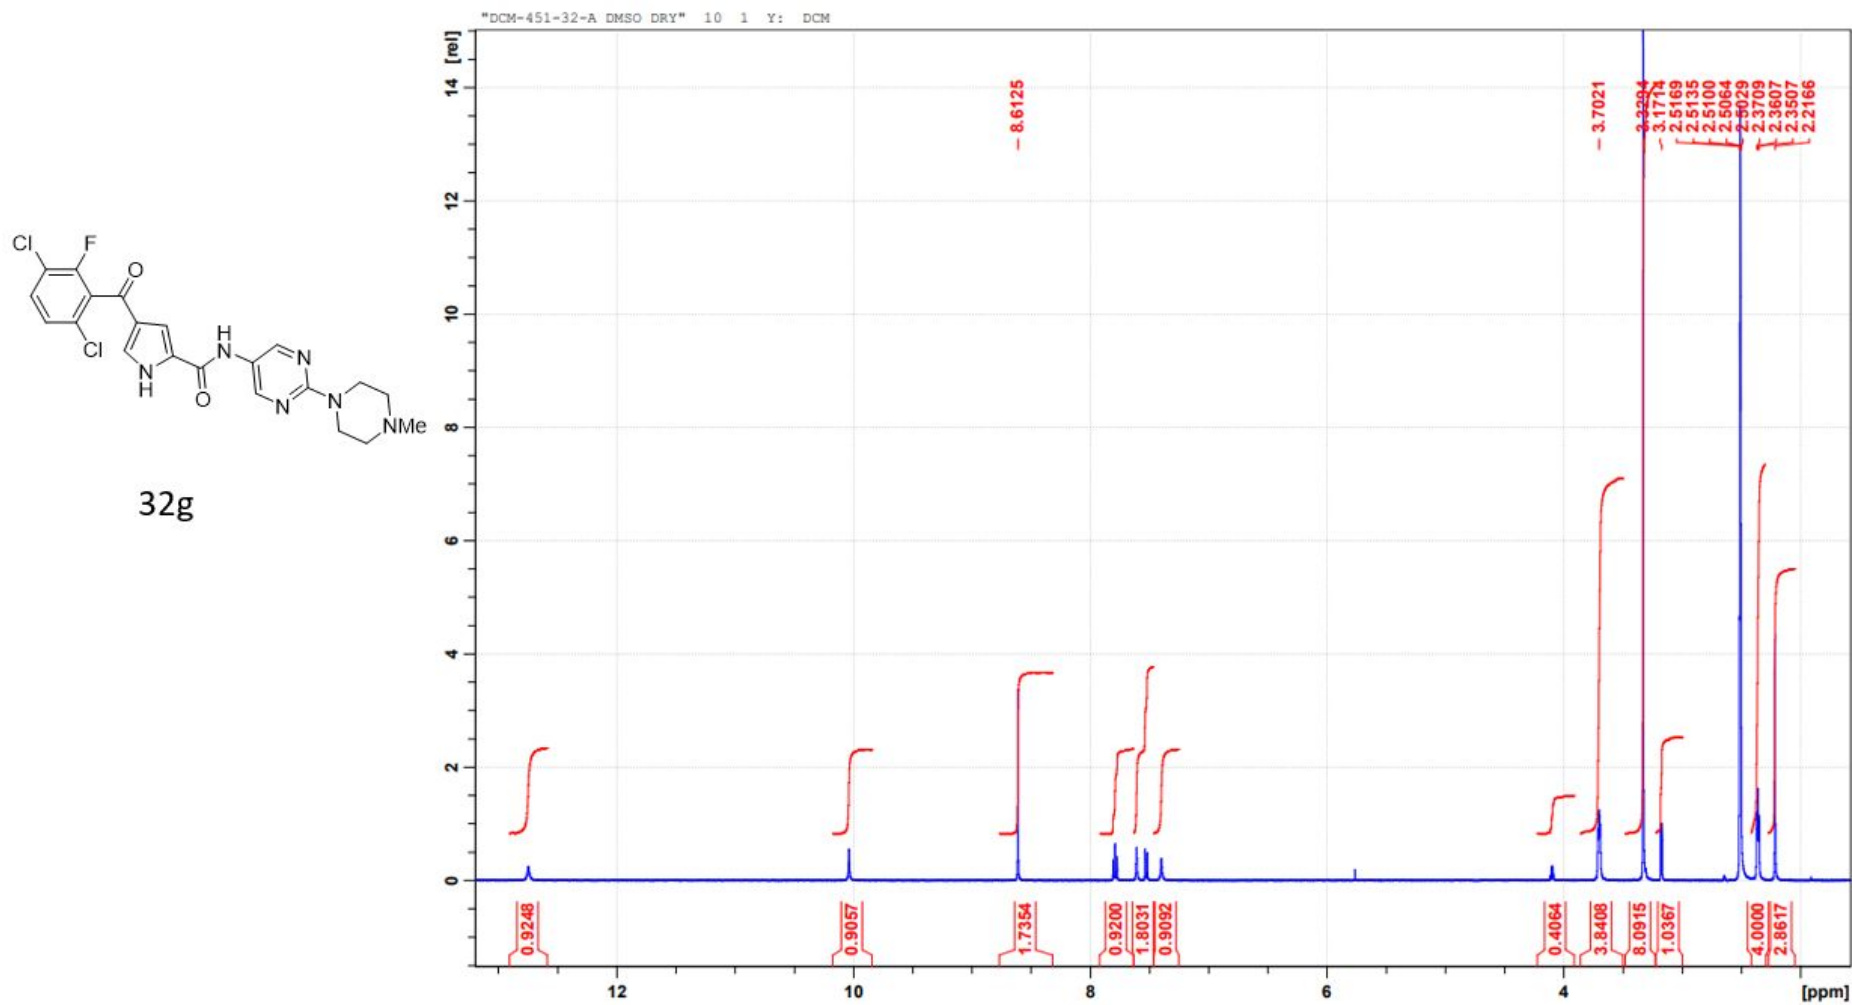



Figure S14: <sup>13</sup>C NMR spectrum of compound **32g**

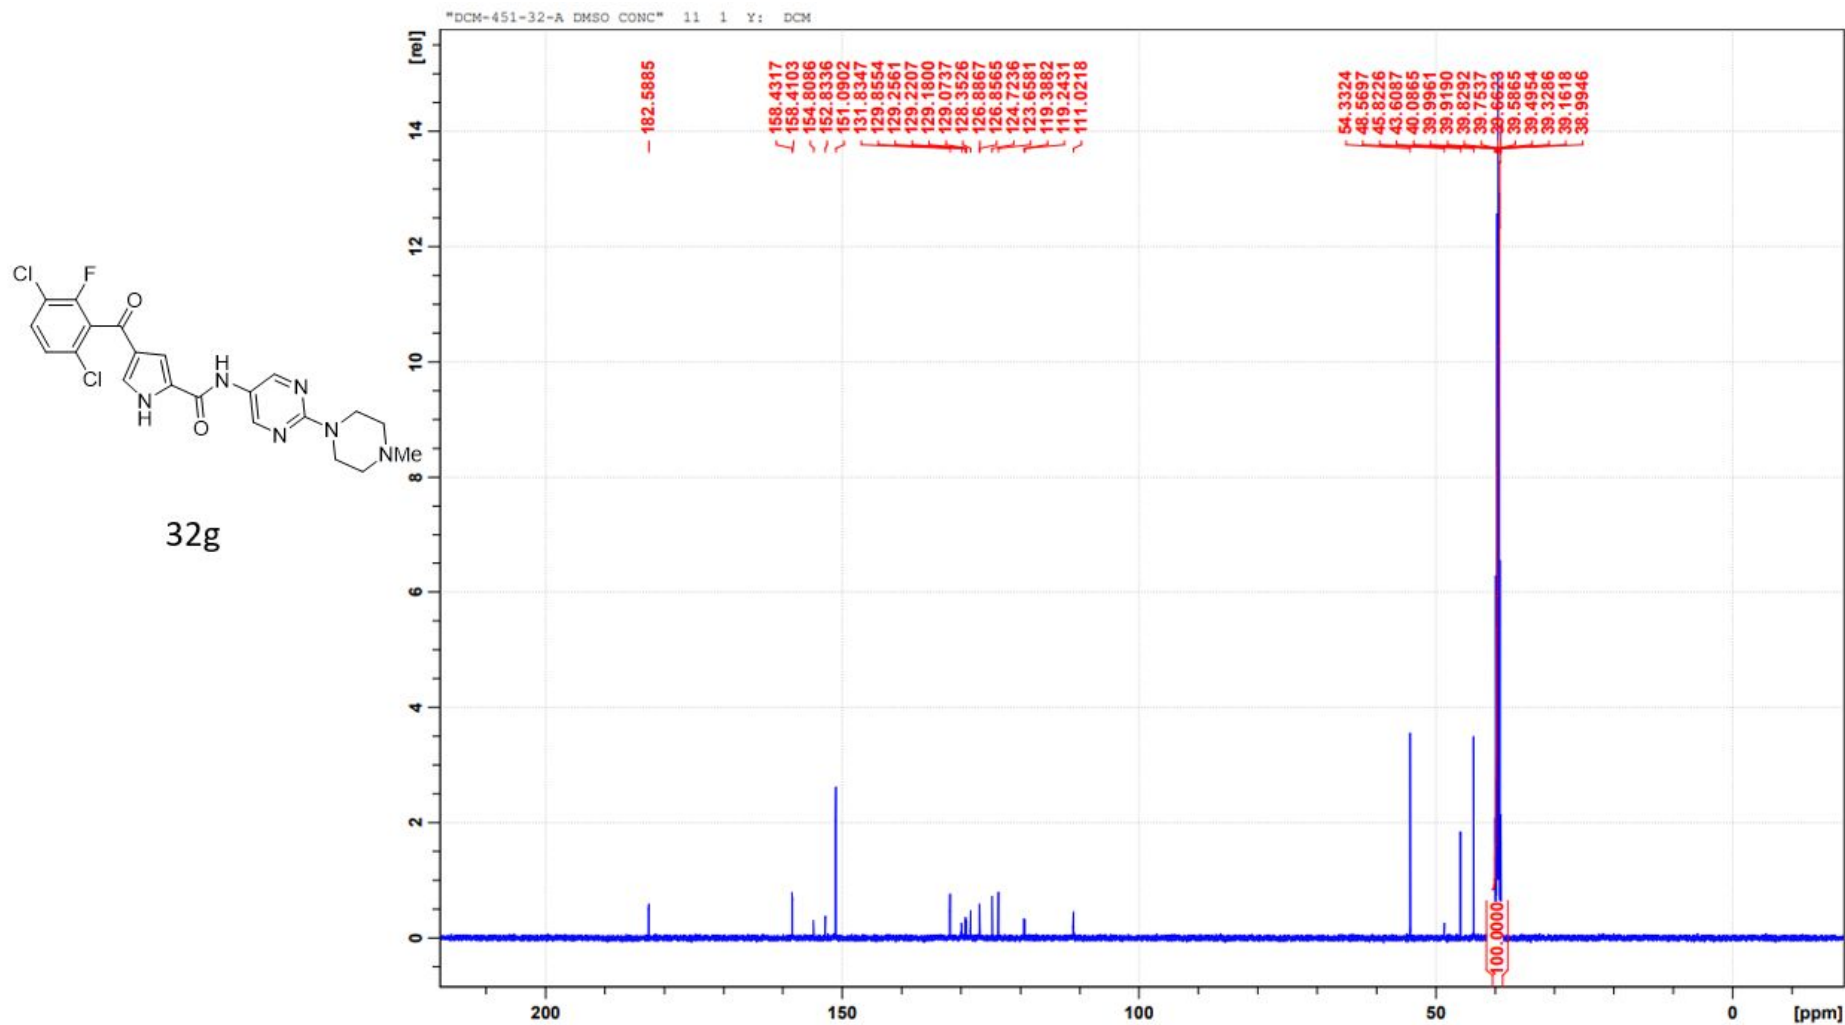

Figure S15: <sup>1</sup>H NMR spectrum of compound **32i**

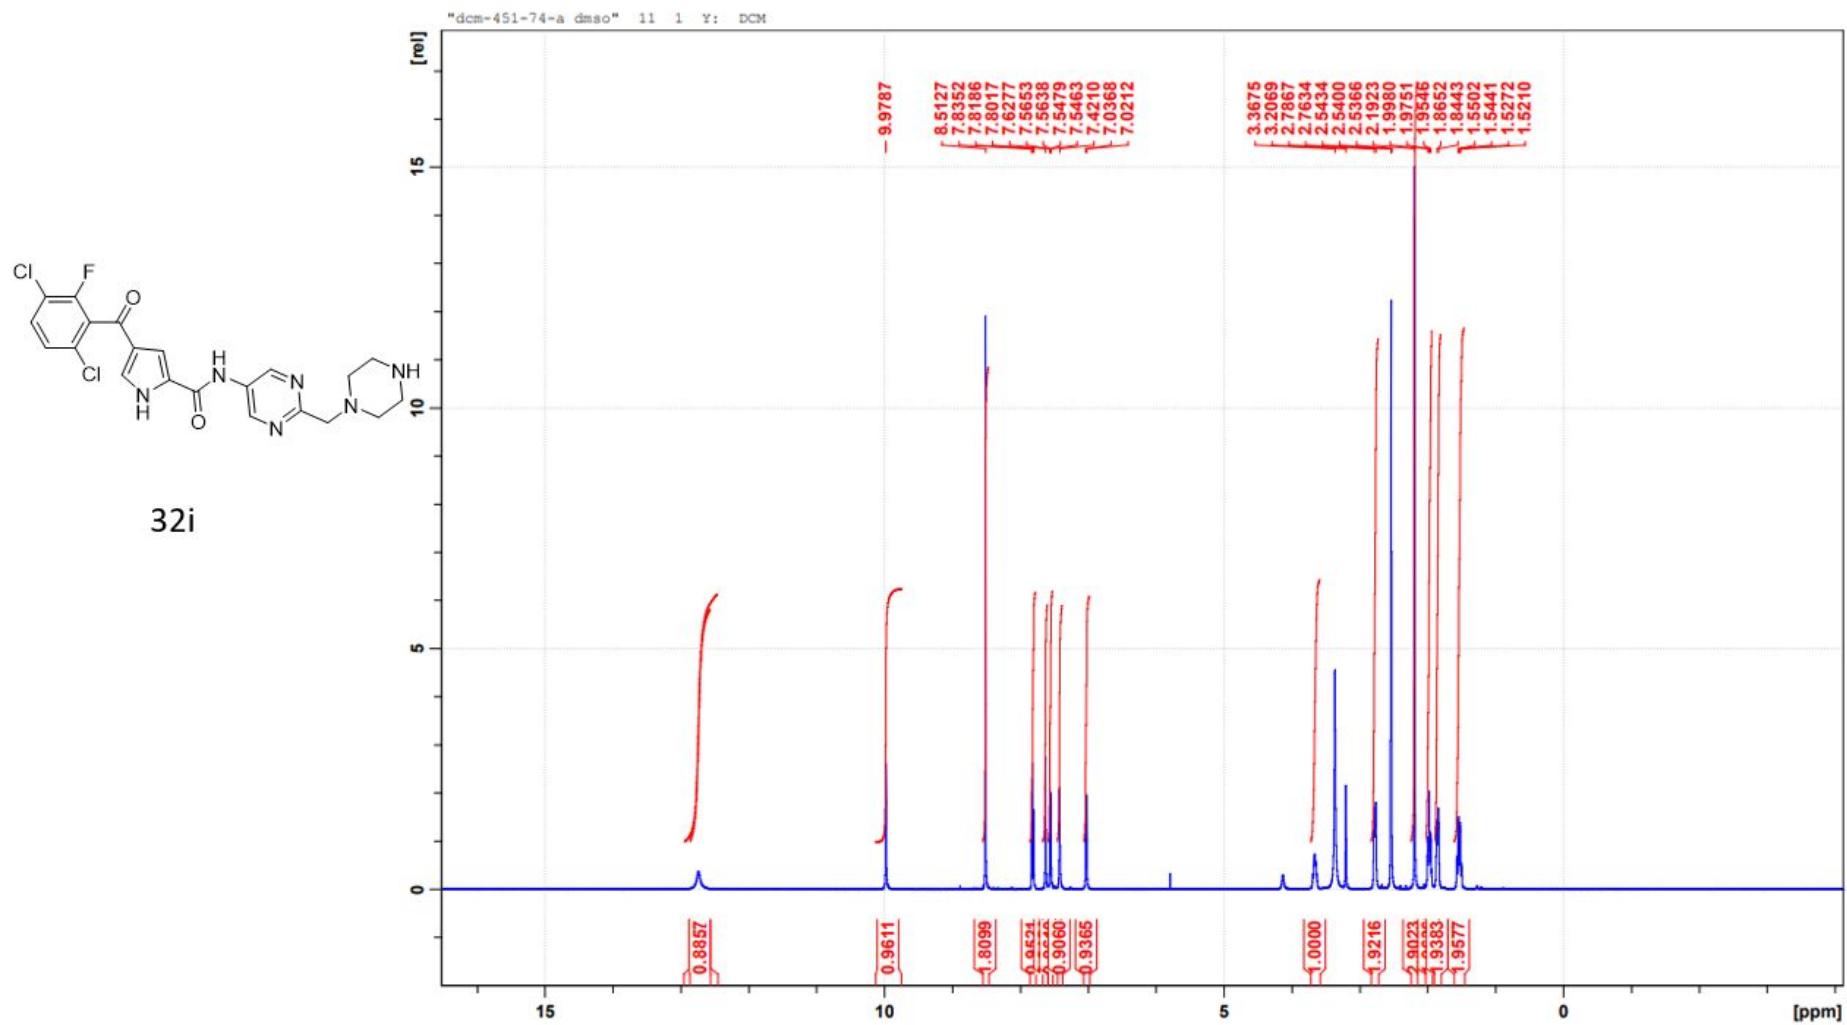

Figure S16: <sup>1</sup>H NMR spectrum of compound **32k**

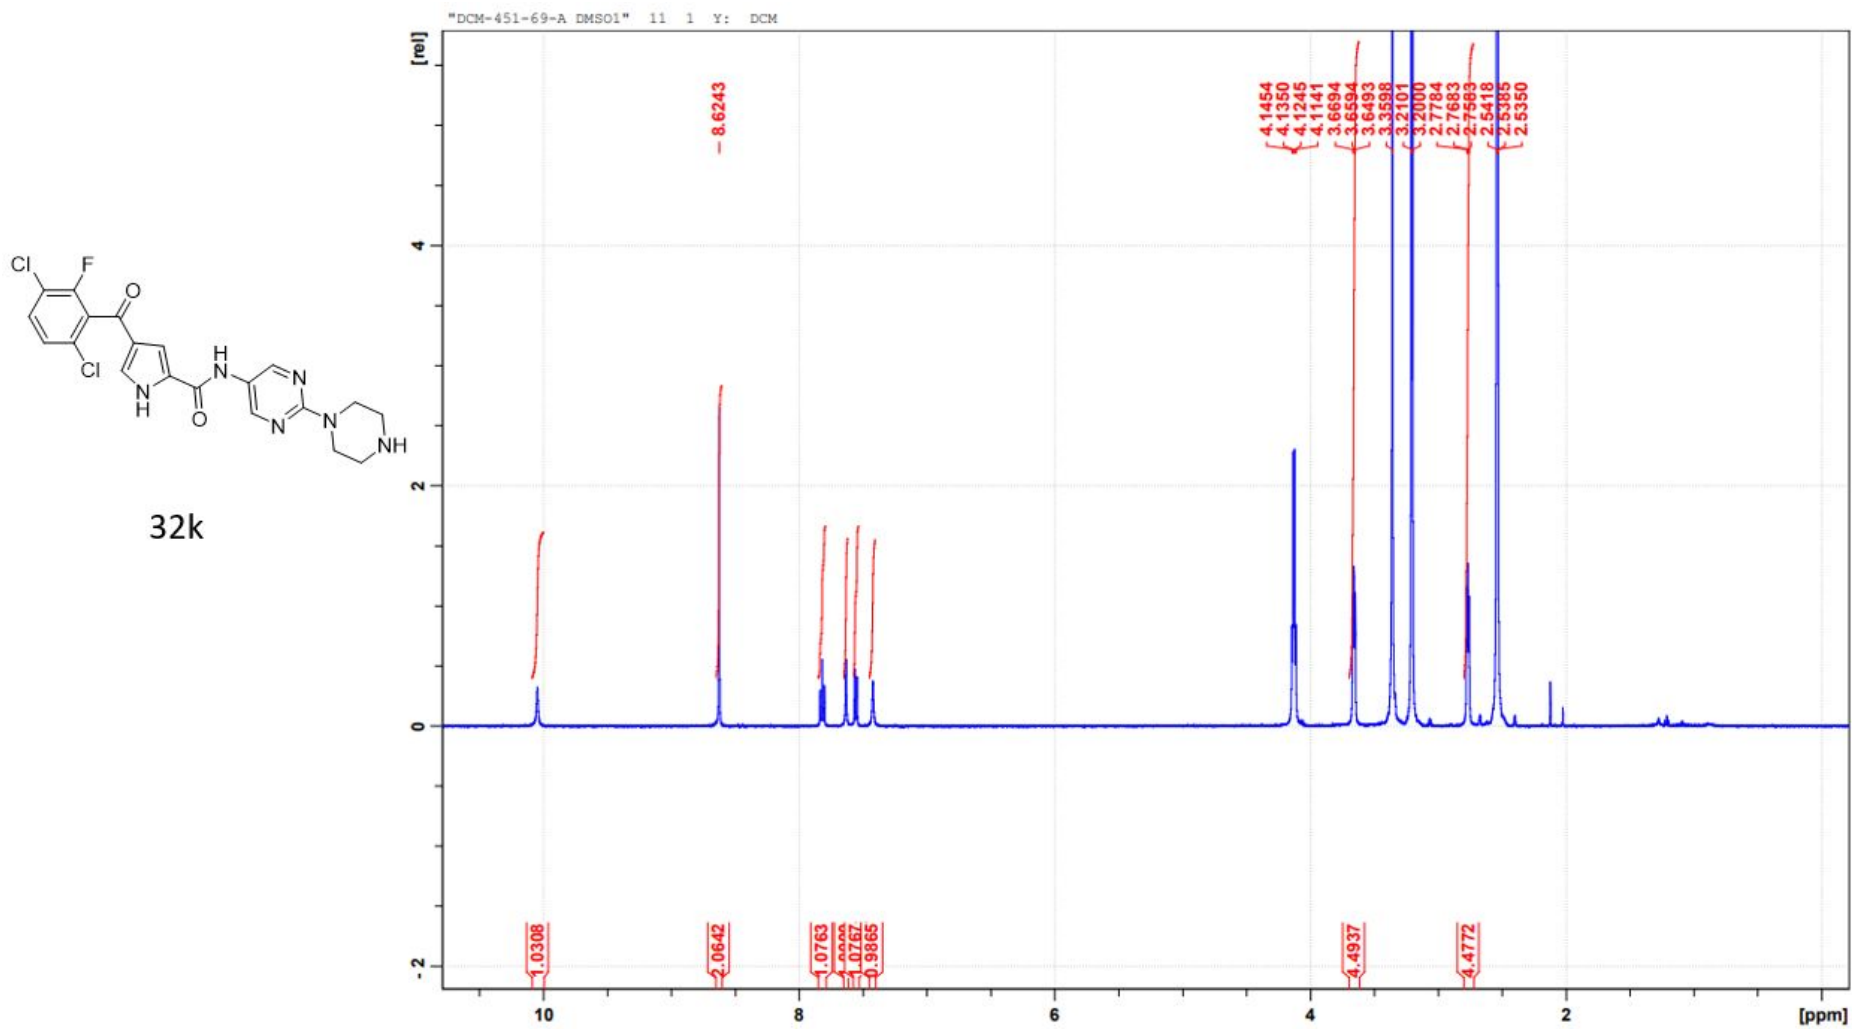

Figure S17: HPLC purity assessment of compound **32k**

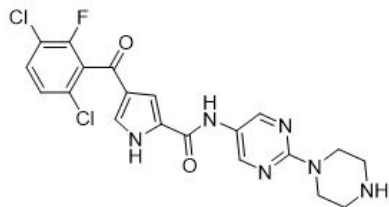

**32k**

Data File F:\31JAN12\_12.D  
Sample Name: DCM/451/69/A

```

=====
Acq. Operator   : Karen Haggerty           Seq. Line :    8
Acq. Instrument : Instrument 1             Location  : Vial 65
Injection Date  : 1/31/2013 7:28:11 PM    Inj       :    1
                                           Inj Volume: 5.000 µl
Different Inj Volume from Sequence !      Actual Inj Volume : 2.000 µl
Acq. Method     : C:\CHEM32\1\DATA\JAN2013\31JAN13_AES_RHB_DCM_BJC_2013-01-31_16-16-16\
XSELECT_ACIDIC.M
Last changed    : 1/31/2013 4:16:23 PM by Karen Haggerty
Analysis Method : F:\31JAN12_12.D\DA.M (XSELECT_ACIDIC.M)
Last changed    : 2/1/2013 6:48:49 AM by Karen Haggerty
                                           (modified after loading)
Method Info     : Waters XSELECT CSH C18 3.5µm 100 x 4.6mm
0.1% Formic Acid (aq)/MeCN, 1.0mL/min
=====
    
```

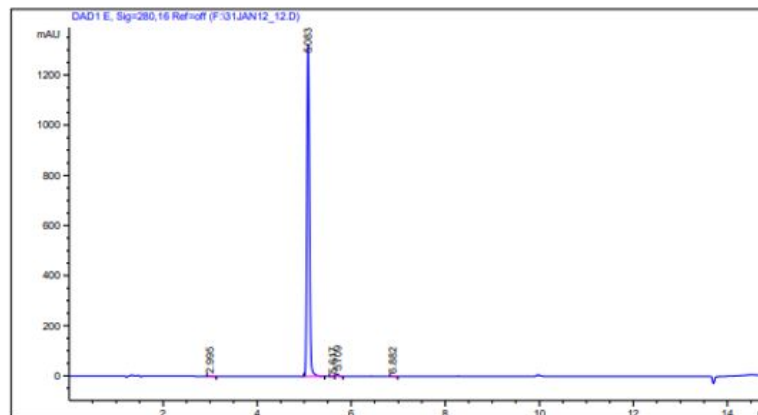

Area Percent Report

```

=====
Sorted By      :      Signal
Multiplier:    :      1.0000
Dilution:      :      1.0000
Use Multiplier & Dilution Factor with ISTDs
    
```

Signal 1: DAD1 E, Sig=280,16 Ref=off

| Peak # | RetTime [min] | Type | Width [min] | Area [mAU*s] | Height [mAU] | Area %  |
|--------|---------------|------|-------------|--------------|--------------|---------|
| 1      | 2.995         | BB   | 0.0614      | 12.25065     | 2.89338      | 0.2575  |
| 2      | 5.083         | VB   | 0.0553      | 4698.15674   | 1328.35876   | 98.7493 |
| 3      | 5.617         | uv   | 0.0641      | 5.05713      | 1.17285      | 0.1063  |

Figure S18: <sup>1</sup>H NMR spectrum of compound **321**

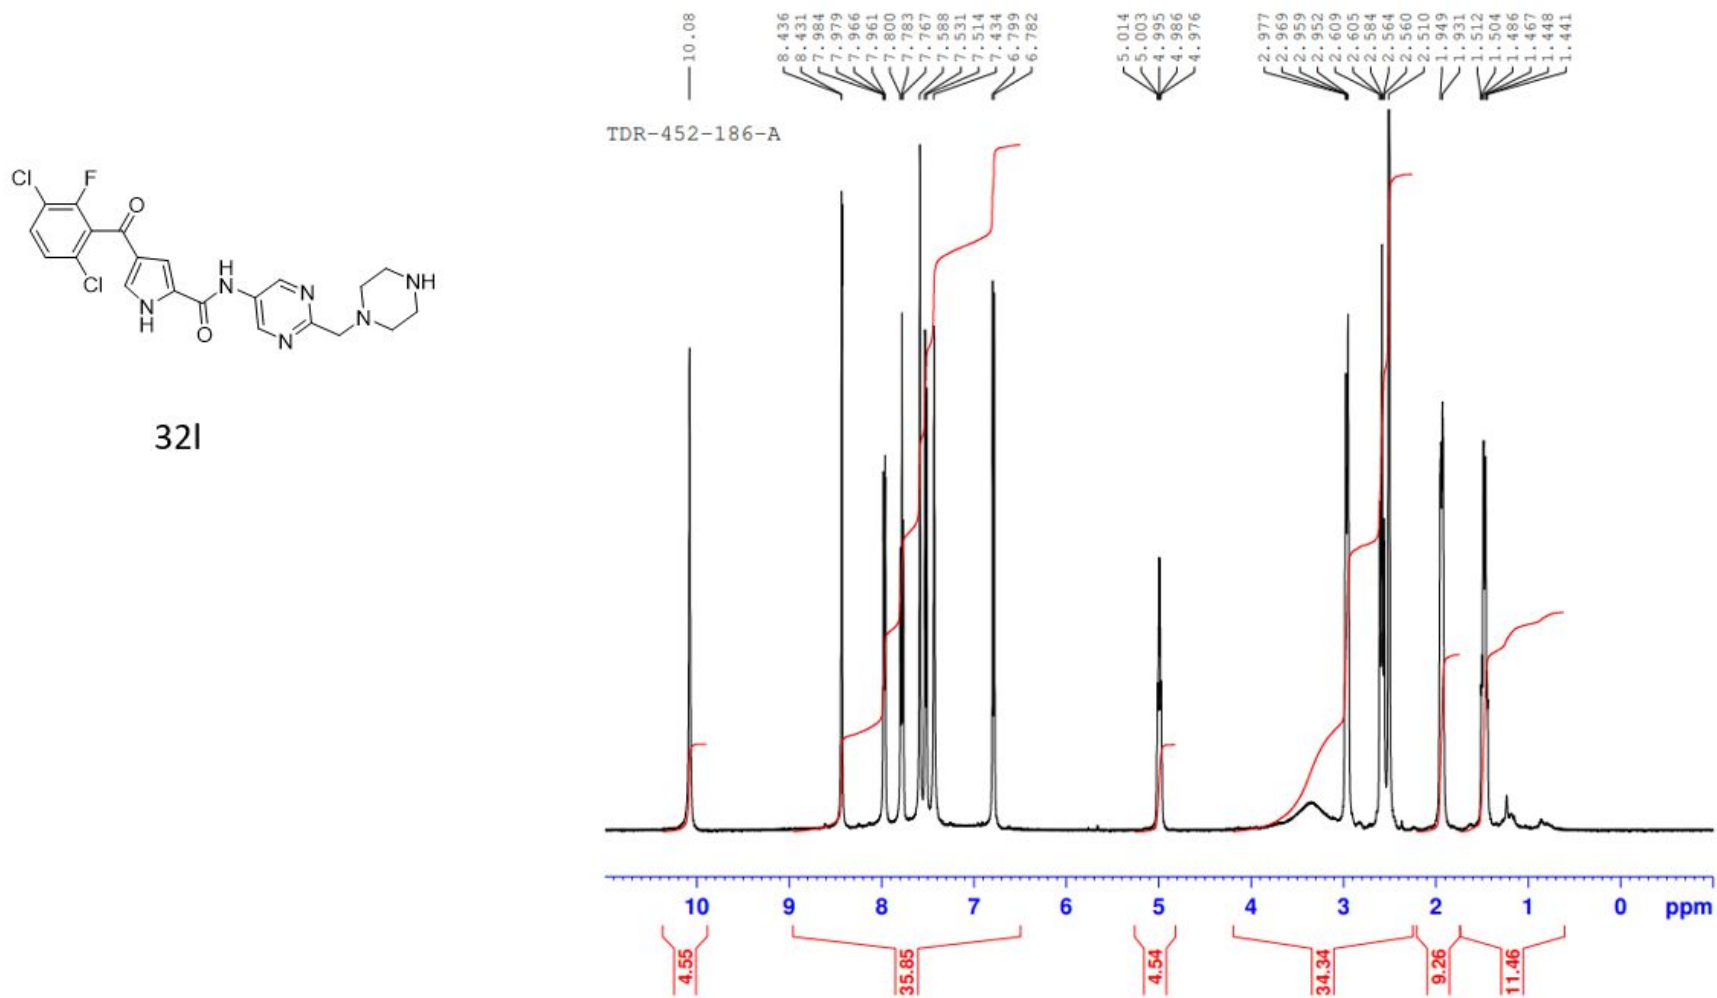

Figure S19: <sup>1</sup>H NMR spectrum of compound **32m**

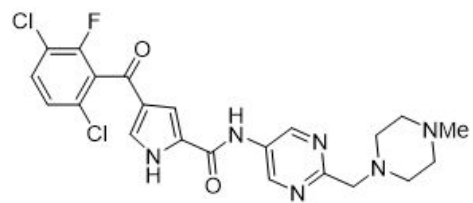

**32m**

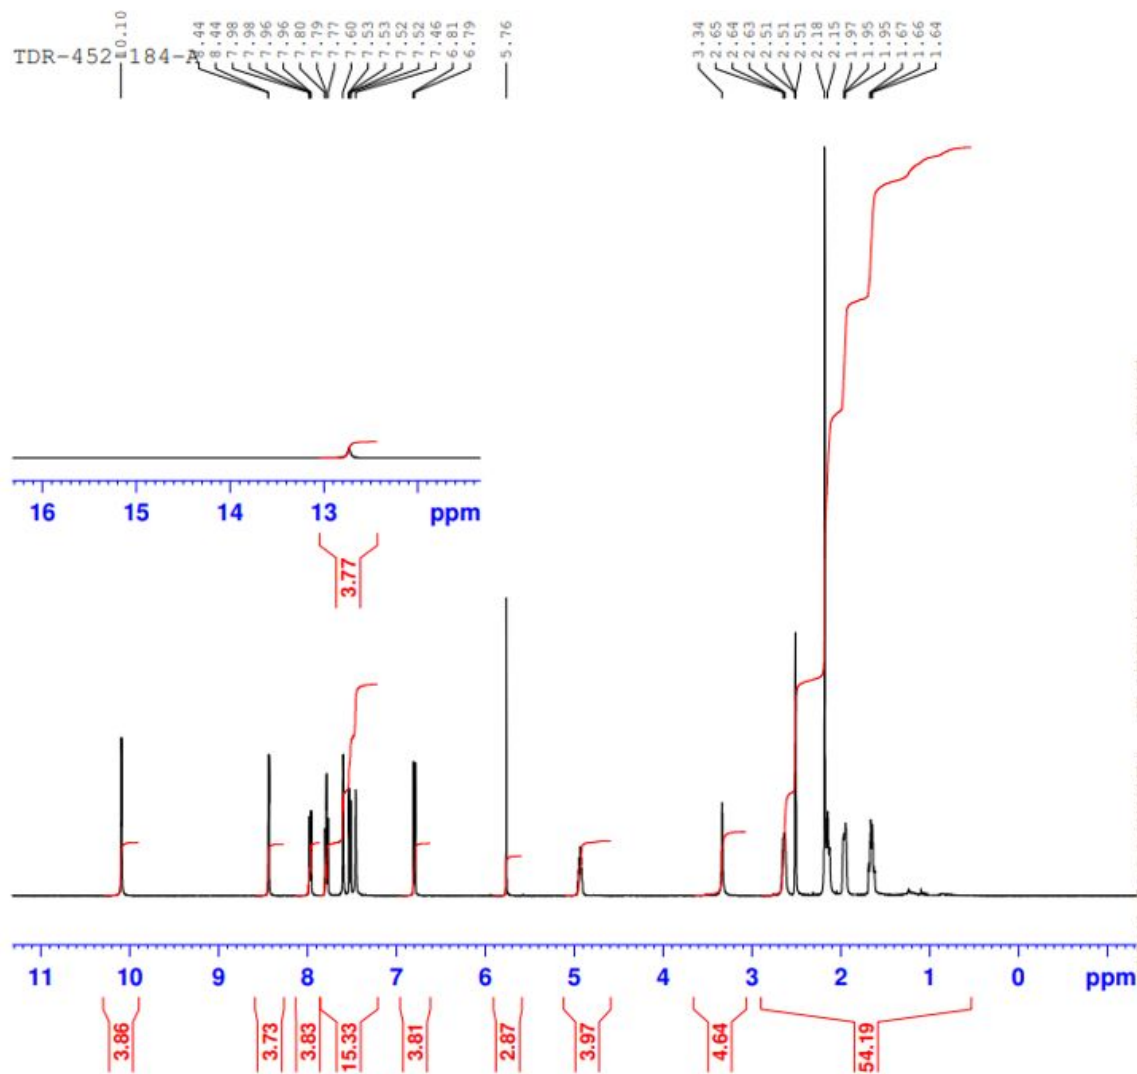

Figure S20: <sup>1</sup>H NMR spectrum of compound **33f**

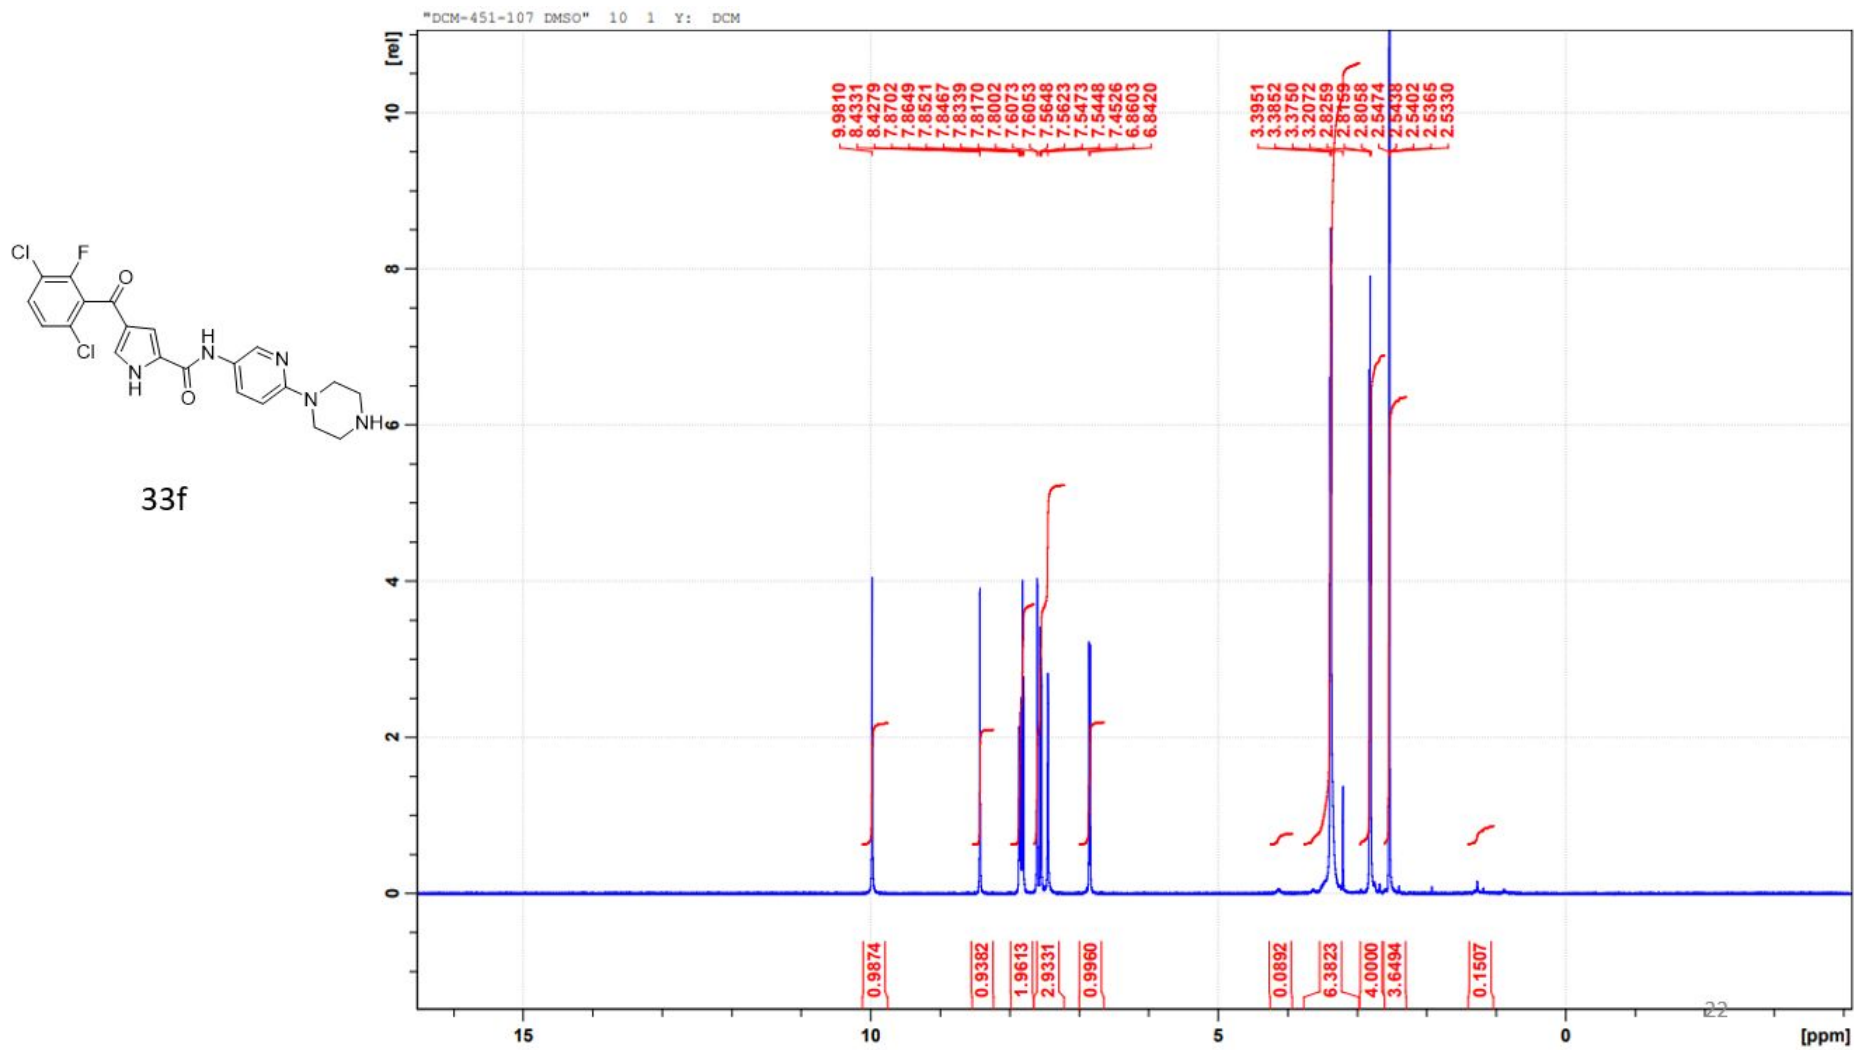

Figure S21: <sup>13</sup>C NMR spectrum of compound **33f**

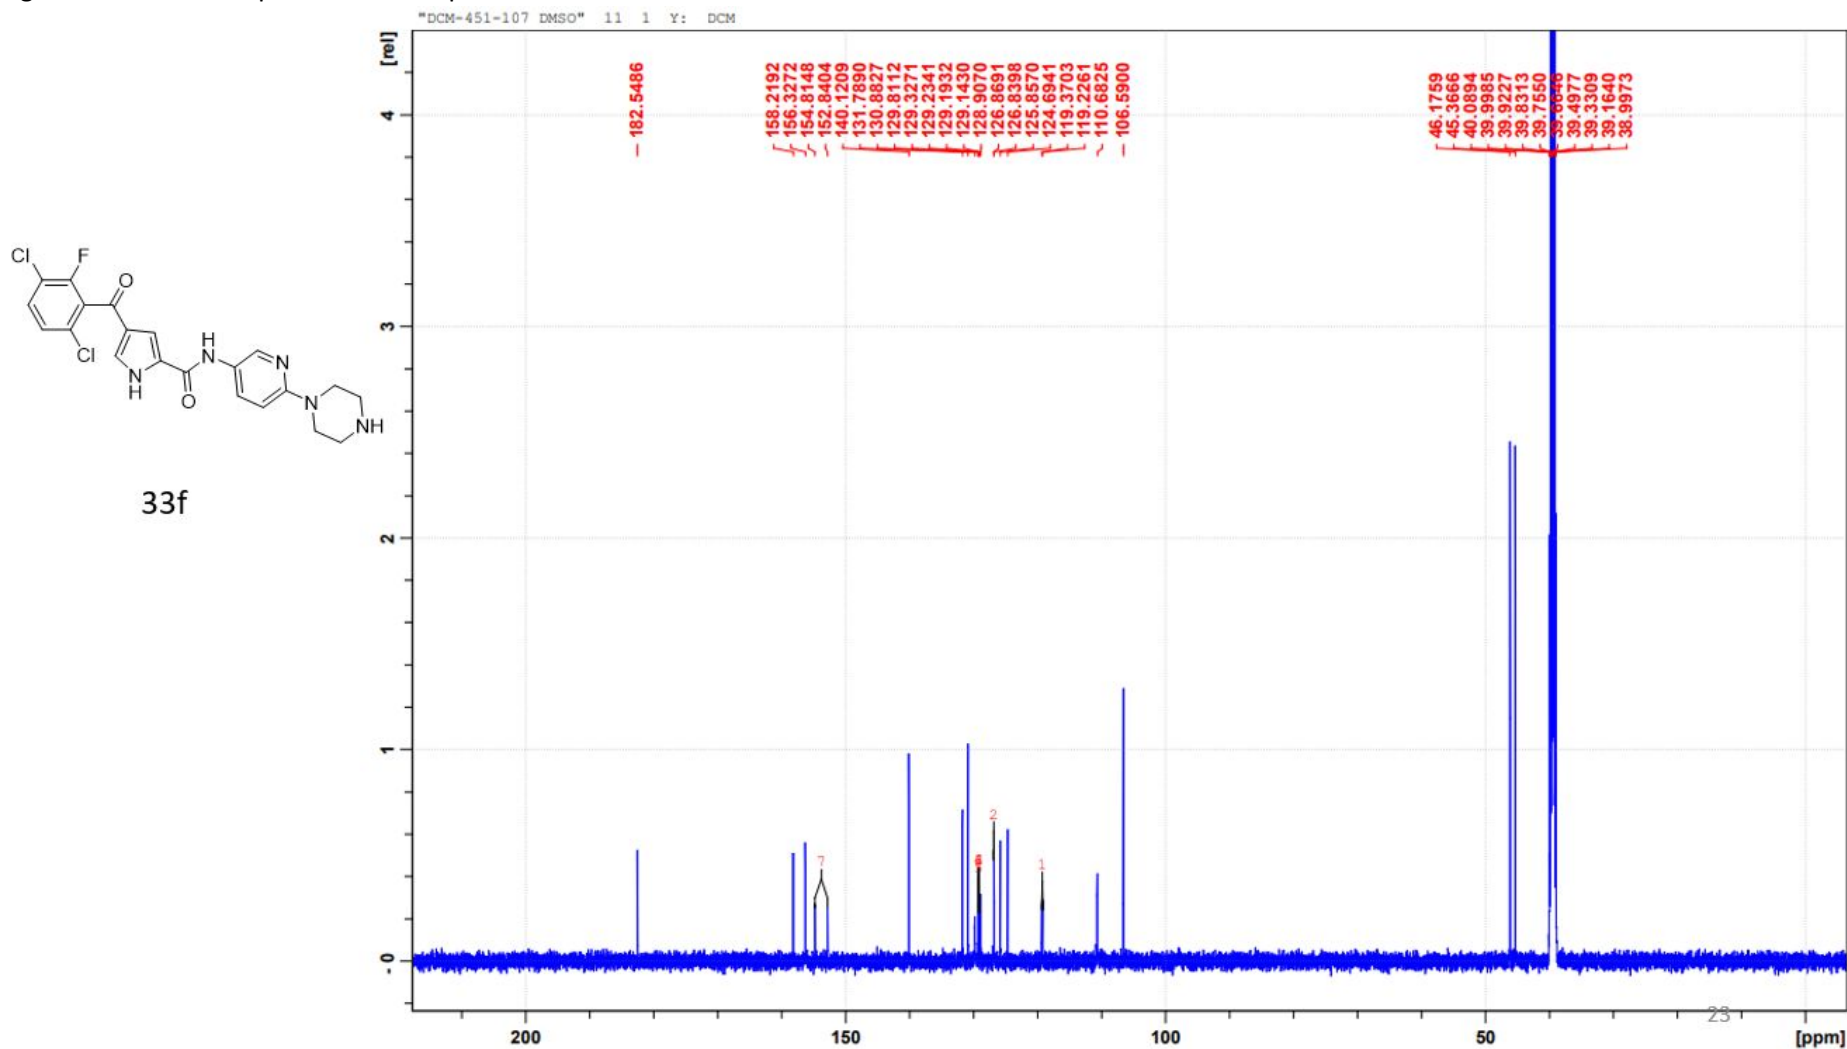



Figure S22: HPLC purity assessment of compound **33f**

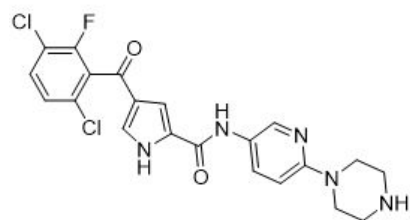

**33f**

Sample Name: DCM/451/107

```

=====
Acq. Operator   : Karen Haggerty           Seq. Line :    5
Acq. Instrument : Instrument 1              Location  : Vial 3
Injection Date  : 3/4/2013 11:36:45 AM     Inj       :    1
                                           Inj Volume: 5.000 µl
Different Inj Volume from Sequence !      Actual Inj Volume: 1.000 µl
Acq. Method    : C:\CHEM32\1\DATA\MAR2013\04MAR13_DCM_JEP 2013-03-04 09-47-43\XSELECT_
ACIDIC.M
Last changed   : 3/4/2013 9:47:51 AM by Karen Haggerty
Analysis Method: F:\04MAR13_07.D\DA.M (XSELECT_ACIDIC.M)
Last changed   : 3/5/2013 6:56:02 AM by Karen Haggerty
                (modified after loading)
Method Info    : Waters XSELECT CSR C18 3.5µm 100 x 4.6mm
                0.1% Formic Acid (aq)/MeCN, 1.0mL/min
=====
    
```

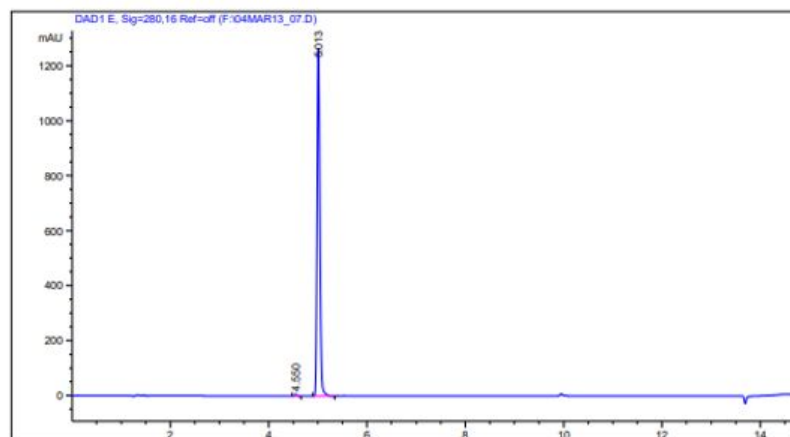

Area Percent Report

```

=====
Sorted By      :      Signal
Multiplier:    :      1.0000
Dilution:      :      1.0000
Use Multiplier & Dilution Factor with ISTDs
    
```

Signal 1: DAD1 E, Sig=280,16 Ref=off

| Peak # | RetTime [min] | Type | Width [min] | Area [mAU*s] | Height [mAU] | Area %  |
|--------|---------------|------|-------------|--------------|--------------|---------|
| 1      | 4.550         | BB   | 0.0572      | 24.22210     | 6.54375      | 0.4918  |
| 2      | 5.013         | VB   | 0.0611      | 4901.33496   | 1268.07605   | 99.5082 |

Figure S23: <sup>1</sup>H NMR spectrum of compound **33g**

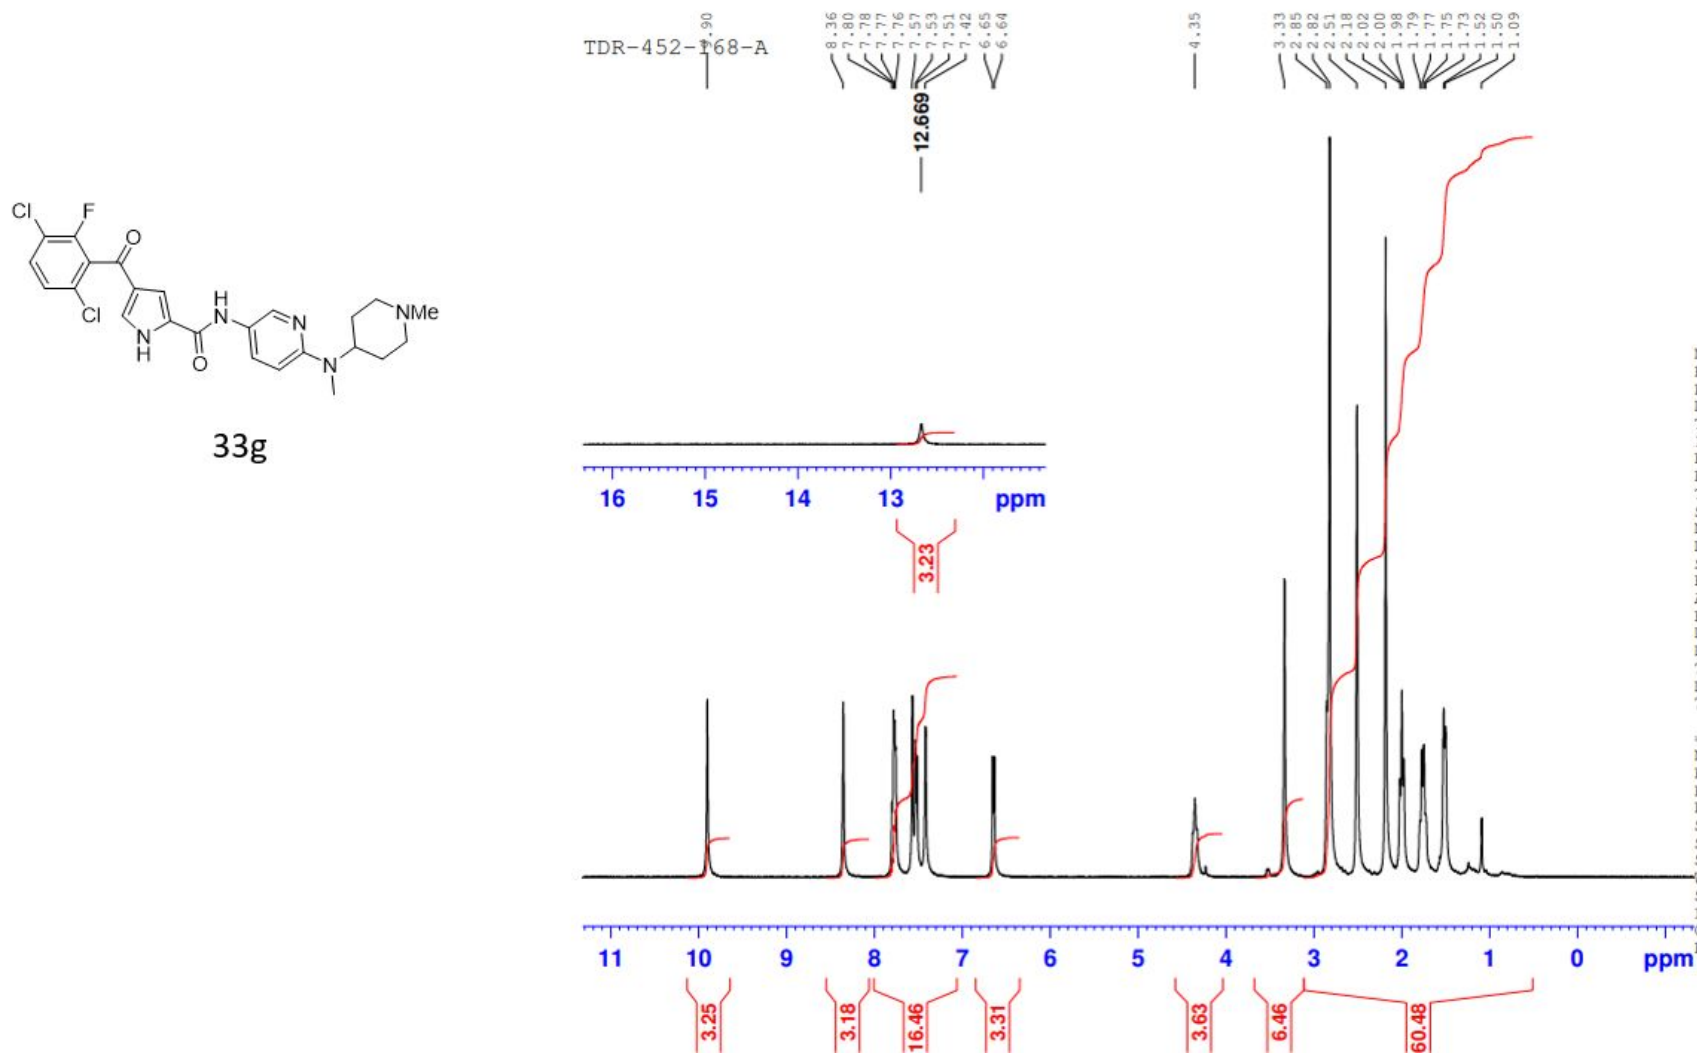



Figure S25:  $^1\text{H}$  NMR spectrum of compound **33i**

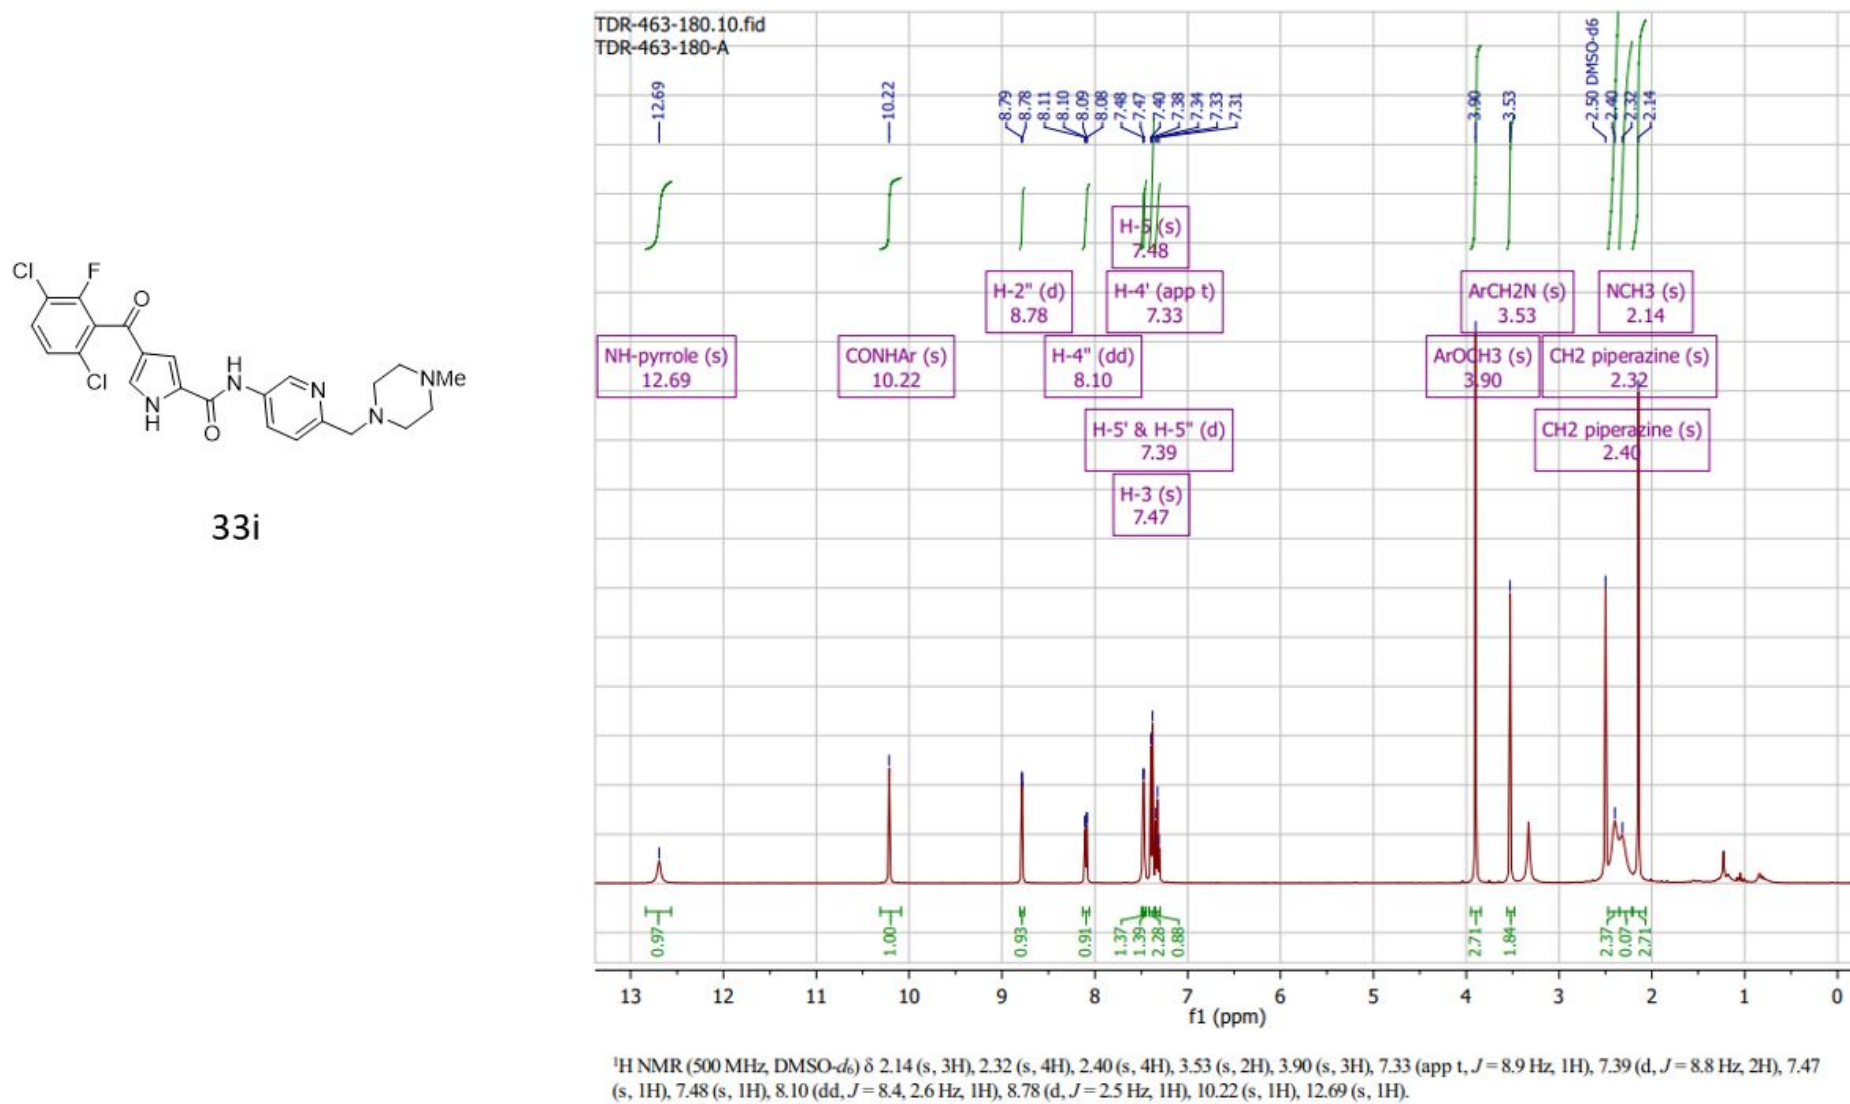

Figure S26: <sup>13</sup>C NMR spectrum of compound **33i**

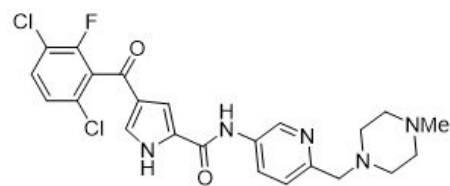

**33i**

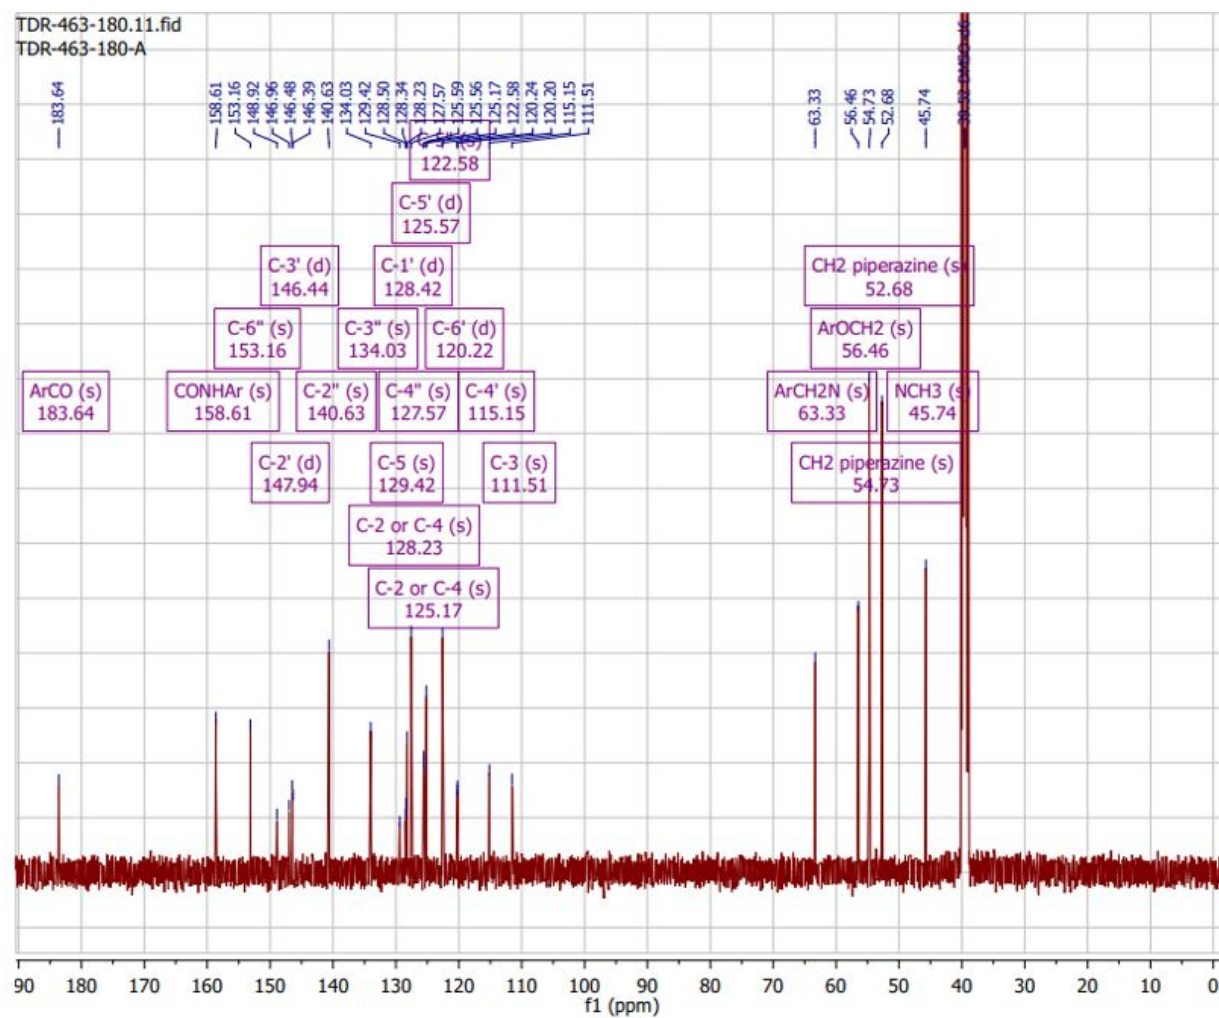

<sup>13</sup>C NMR (126 MHz, DMSO-*d*<sub>6</sub>) δ 45.7, 52.7, 54.7, 56.5, 63.3, 111.5, 115.1, 120.2 (d, *J* = 4.9 Hz), 122.6, 125.2, 125.6 (d, *J* = 3.8 Hz), 127.6, 128.2, 128.4 (d, *J* = 19.9 Hz), 129.4, 134.0, 140.6, 146.4 (d, *J* = 10.8 Hz), 147.9 (d, *J* = 247.0 Hz), 153.2, 158.6, 183.6.

Figure S27: <sup>1</sup>H NMR spectrum of compound **33j**

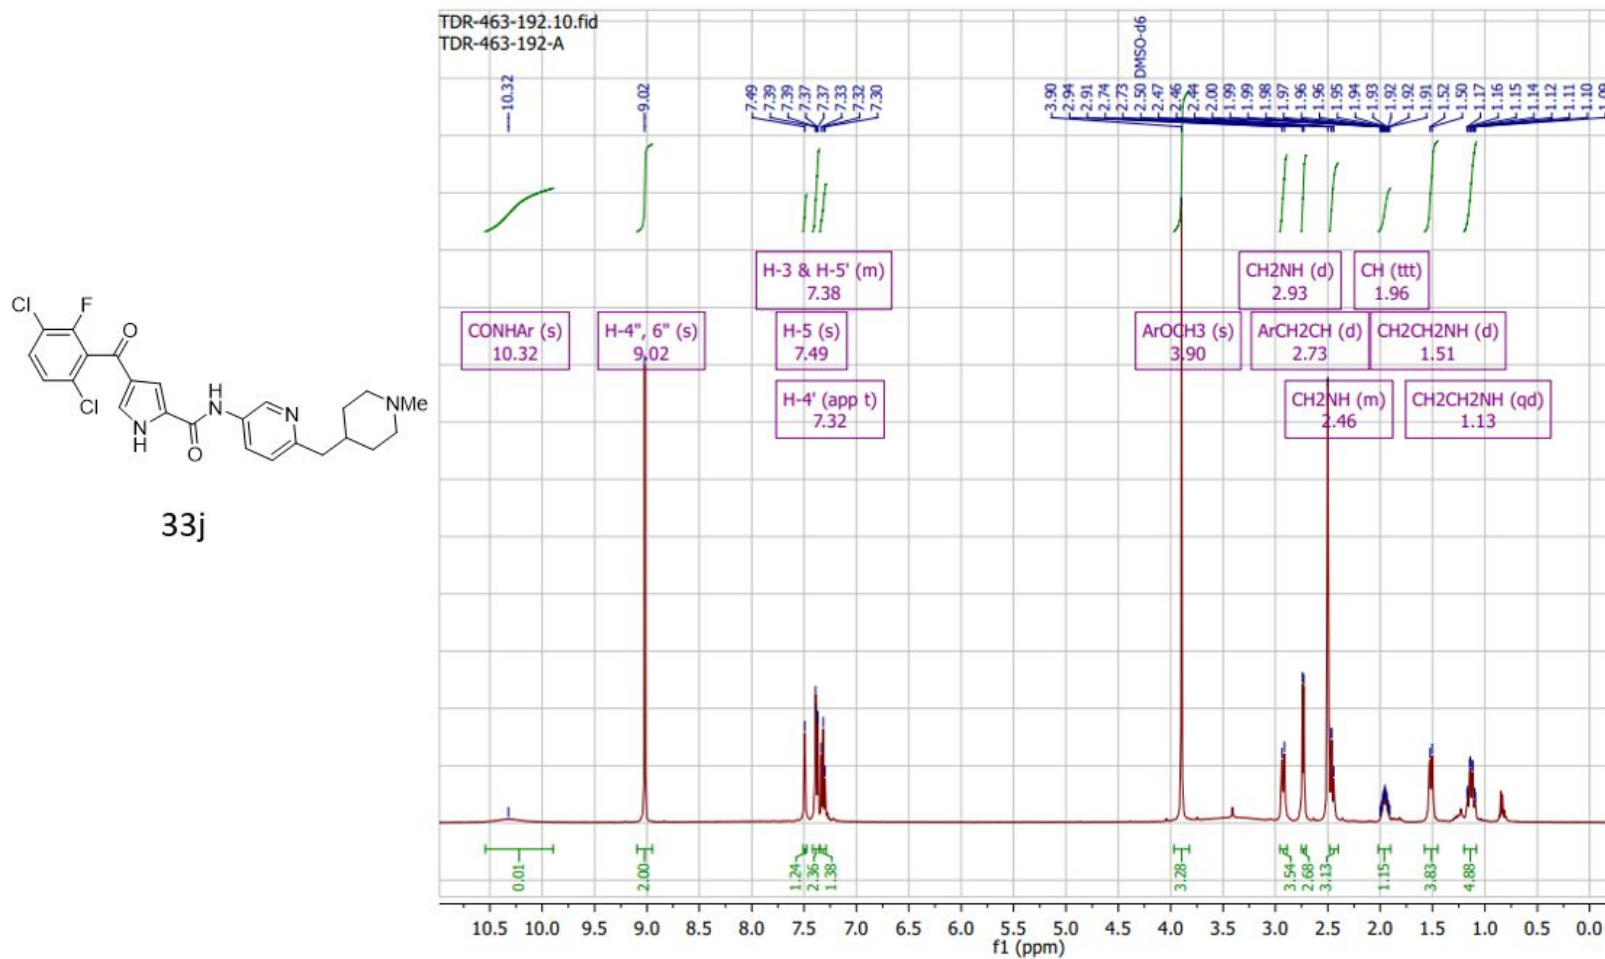

<sup>1</sup>H NMR (500 MHz, DMSO-*d*<sub>6</sub>) δ 1.13 (qd, *J* = 12.3, 3.8 Hz, 2H), 1.51 (d, *J* = 11.1 Hz, 2H), 1.96 (ttt, *J* = 11.2, 7.2, 3.9 Hz, 1H), 2.40–2.48 (m, 2H), 2.73 (d, *J* = 7.1 Hz, 2H), 2.93 (d, *J* = 12.1 Hz, 2H), 3.90 (s, 3H), 7.32 (app t, *J* = 9.0 Hz, 1H), 7.35–7.42 (m, 2H), 7.49 (s, 1H), 9.02 (s, 2H), 10.32 (s, 1H).

Figure S28:  $^{13}\text{C}$  NMR spectrum of compound **33j**

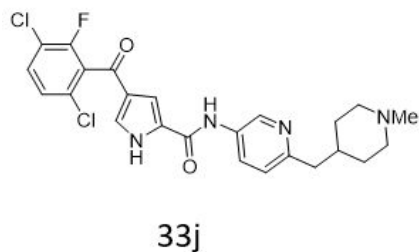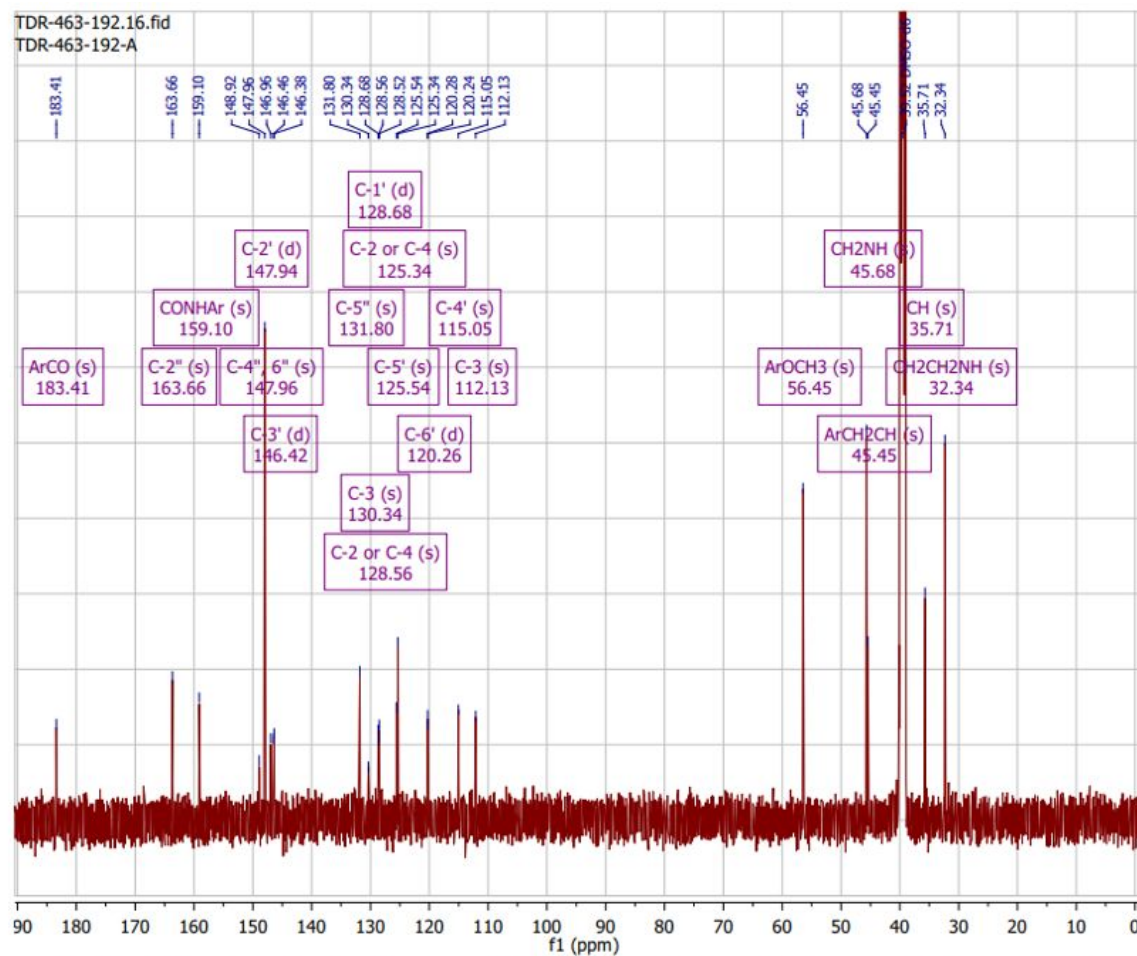

$^{13}\text{C}$  NMR (126 MHz,  $\text{DMSO}-d_6$ )  $\delta$  32.3, 35.7, 45.5, 45.7, 56.4, 112.1, 115.0, 120.3 (d,  $J = 5.0$  Hz), 125.3, 125.5, 128.6, 128.7 (d,  $J = 20.6$  Hz), 130.3, 131.8, 146.4 (d,  $J = 10.6$  Hz), 147.9 (d,  $J = 246.8$  Hz), 148.0, 159.1, 163.7, 183.4.

Figure S29: HPLC purity assessment of compound **33j**

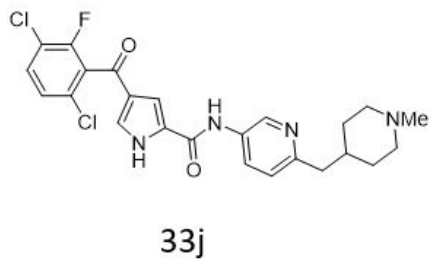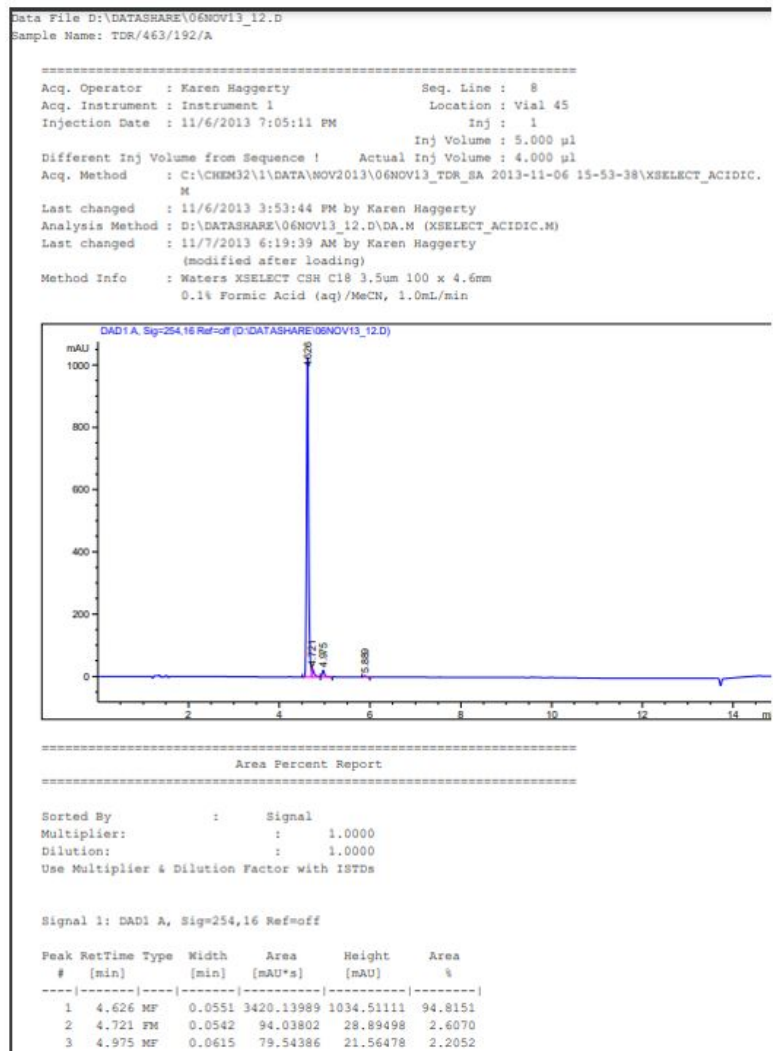



Figure S30:  $^1\text{H}$  NMR spectrum of compound **33k**

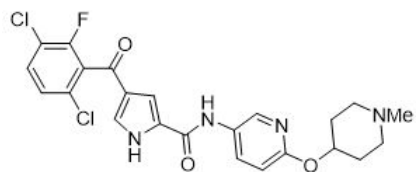

**33k**

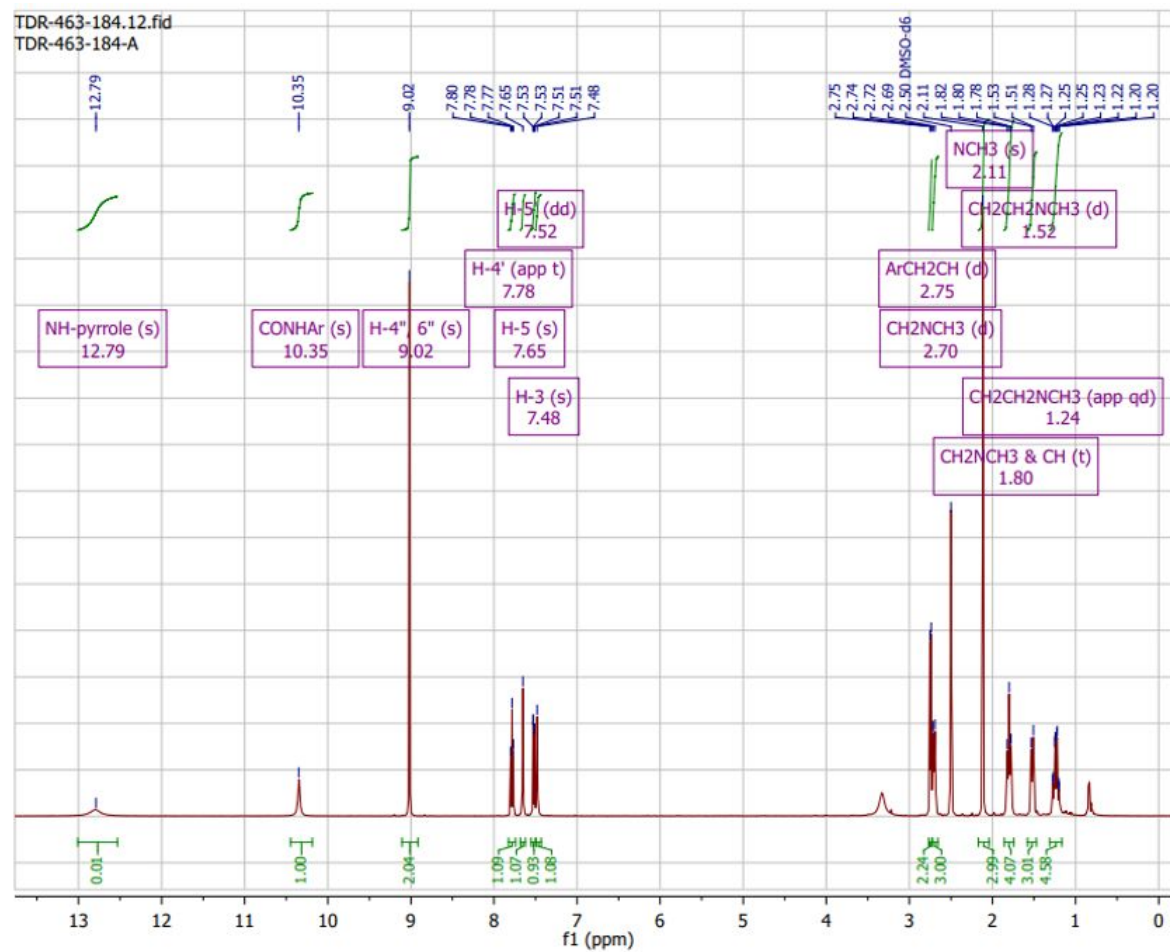

$^1\text{H}$  NMR (500 MHz,  $\text{DMSO-}d_6$ )  $\delta$  1.24 (app qd,  $J = 12.3, 3.6$  Hz, 2H), 1.52 (d,  $J = 12.2$  Hz, 2H), 1.80 (t,  $J = 11.0$  Hz, 4H), 2.11 (s, 3H), 2.70 (d,  $J = 11.4$  Hz, 2H), 2.75 (d,  $J = 7.1$  Hz, 2H), 7.48 (s, 1H), 7.52 (dd,  $J = 8.7, 1.3$  Hz, 1H), 7.65 (s, 1H), 7.78 (app t,  $J = 8.4$  Hz, 1H), 9.02 (s, 2H), 10.35 (s, 1H), 12.79 (s, 1H).

Figure S31:  $^{13}\text{C}$  NMR spectrum of compound **33k**

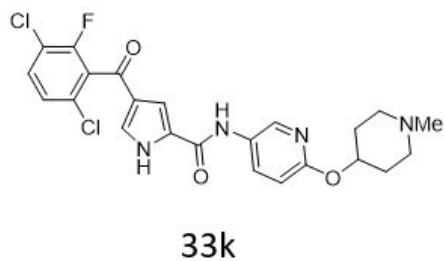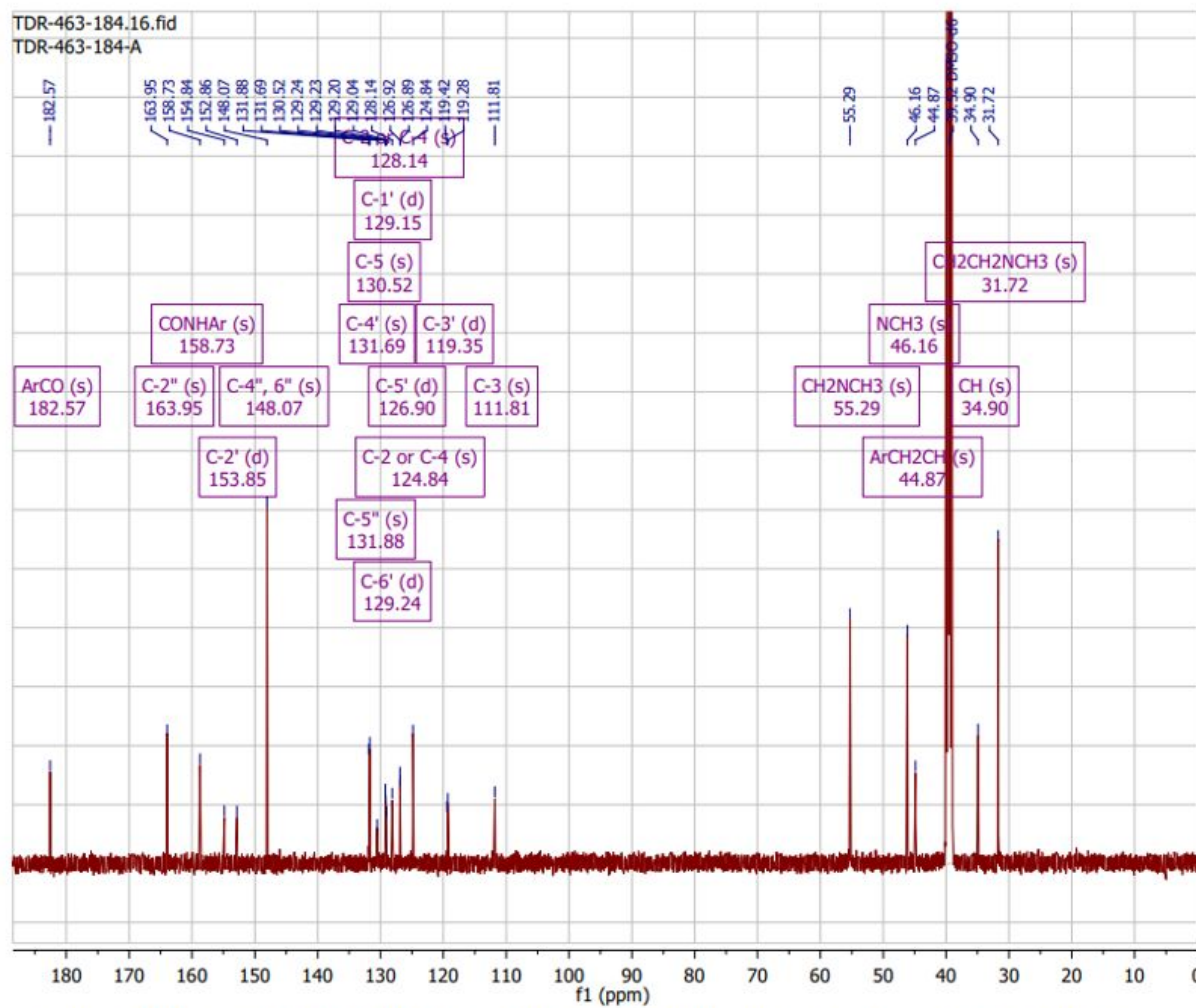

$^{13}\text{C}$  NMR (126 MHz,  $\text{DMSO}-d_6$ )  $\delta$  31.7, 34.9, 44.9, 46.2, 55.3, 111.8, 119.4 (d,  $J = 18.1$  Hz), 124.8, 126.9 (d,  $J = 3.9$  Hz), 128.1, 129.2 (d,  $J = 23.3$  Hz), 129.2 (d,  $J = 5.0$  Hz), 130.5, 131.7, 131.9, 148.1, 153.9 (d,  $J = 248.7$  Hz), 158.7, 163.9, 182.6.

Figure S32: HPLC purity assessment of compound **33k**

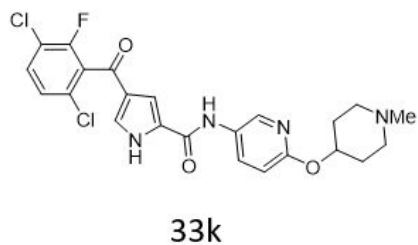

Data File D:\DATASHARE\05NOV13\_12.D  
Sample Name: TDR/463/184/A

```

=====
Acq. Operator   : Karen Haggerty           Seq. Line :    8
Acq. Instrument : Instrument 1              Location  : Vial 45
Injection Date  : 11/5/2013 7:11:29 PM      Inj       :    1
                                           Inj Volume: 5.000 µl
Different Inj Volume from Sequence !      Actual Inj Volume: 2.000 µl
Acq. Method     : C:\CHEM32\1\DATA\NOV2013\05NOV13_TDR_JEP_AB 2013-11-05 16-00-04\XSELECT_
ACIDIC.M
Last changed    : 11/5/2013 4:00:12 PM by Karen Haggerty
Analysis Method : D:\DATASHARE\05NOV13_12.D\DA.M (XSELECT_ACIDIC.M)
Last changed    : 11/6/2013 7:37:34 AM by Karen Haggerty
                 (modified after loading)
Method Info     : Waters XSELECT CSH C18 3.5µm 100 x 4.6mm
                 0.1% Formic Acid (aq)/MeCN, 1.0mL/min
=====
    
```

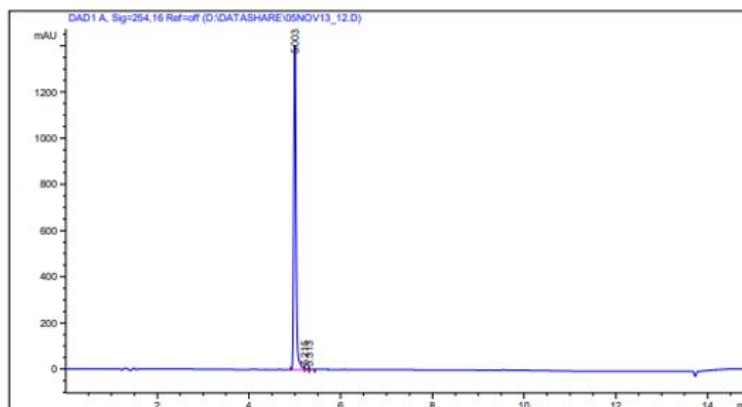

=====  
Area Percent Report  
=====

```

Sorted By      :      Signal
Multiplier:    :      1.0000
Dilution:      :      1.0000
Use Multiplier & Dilution Factor with ISTDs
    
```

Signal 1: DAD1 A, Sig=254,16 Ref=off

| Peak # | RetTime [min] | Type | Width [min] | Area [mAU*s] | Height [mAU] | Area %  |
|--------|---------------|------|-------------|--------------|--------------|---------|
| 1      | 5.003         | MF   | 0.0567      | 4798.38086   | 1409.70972   | 99.5686 |
| 2      | 5.215         | FM   | 0.0568      | 14.24326     | 4.18153      | 0.2956  |
| 3      | 5.313         | FM   | 0.0844      | 6.54838      | 1.29375      | 0.1359  |

Figure S33: <sup>1</sup>H NMR spectrum of compound **34a**

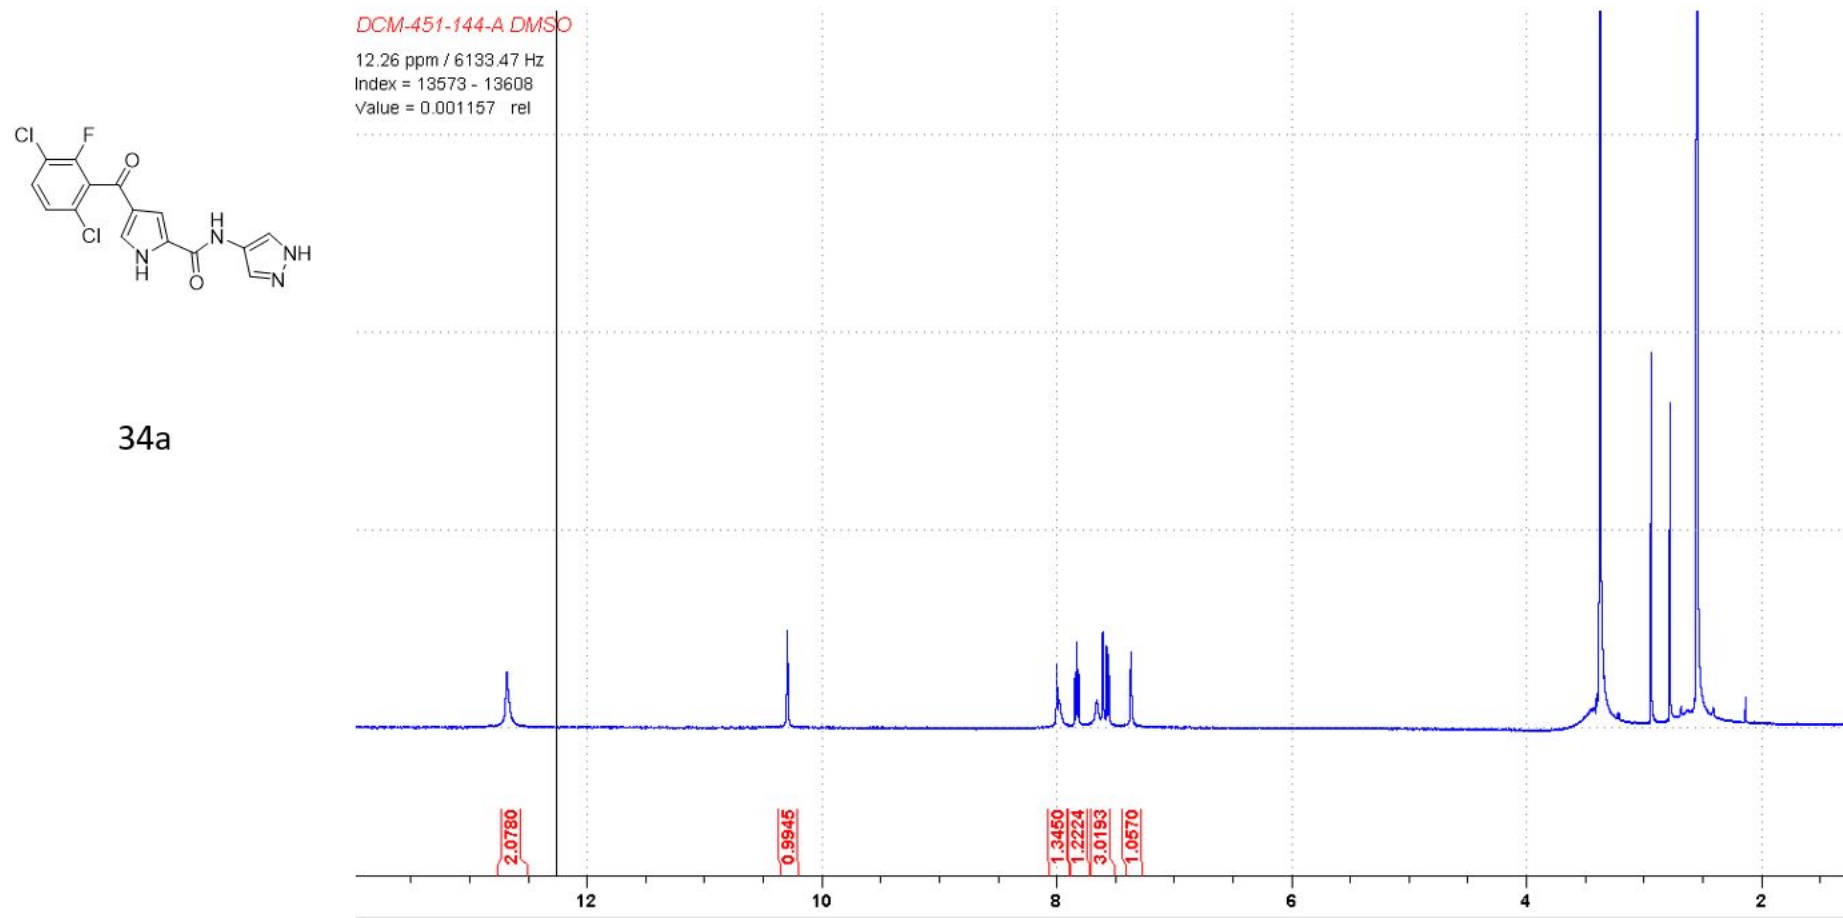

Figure S34: <sup>1</sup>H NMR spectrum of compound **34b**

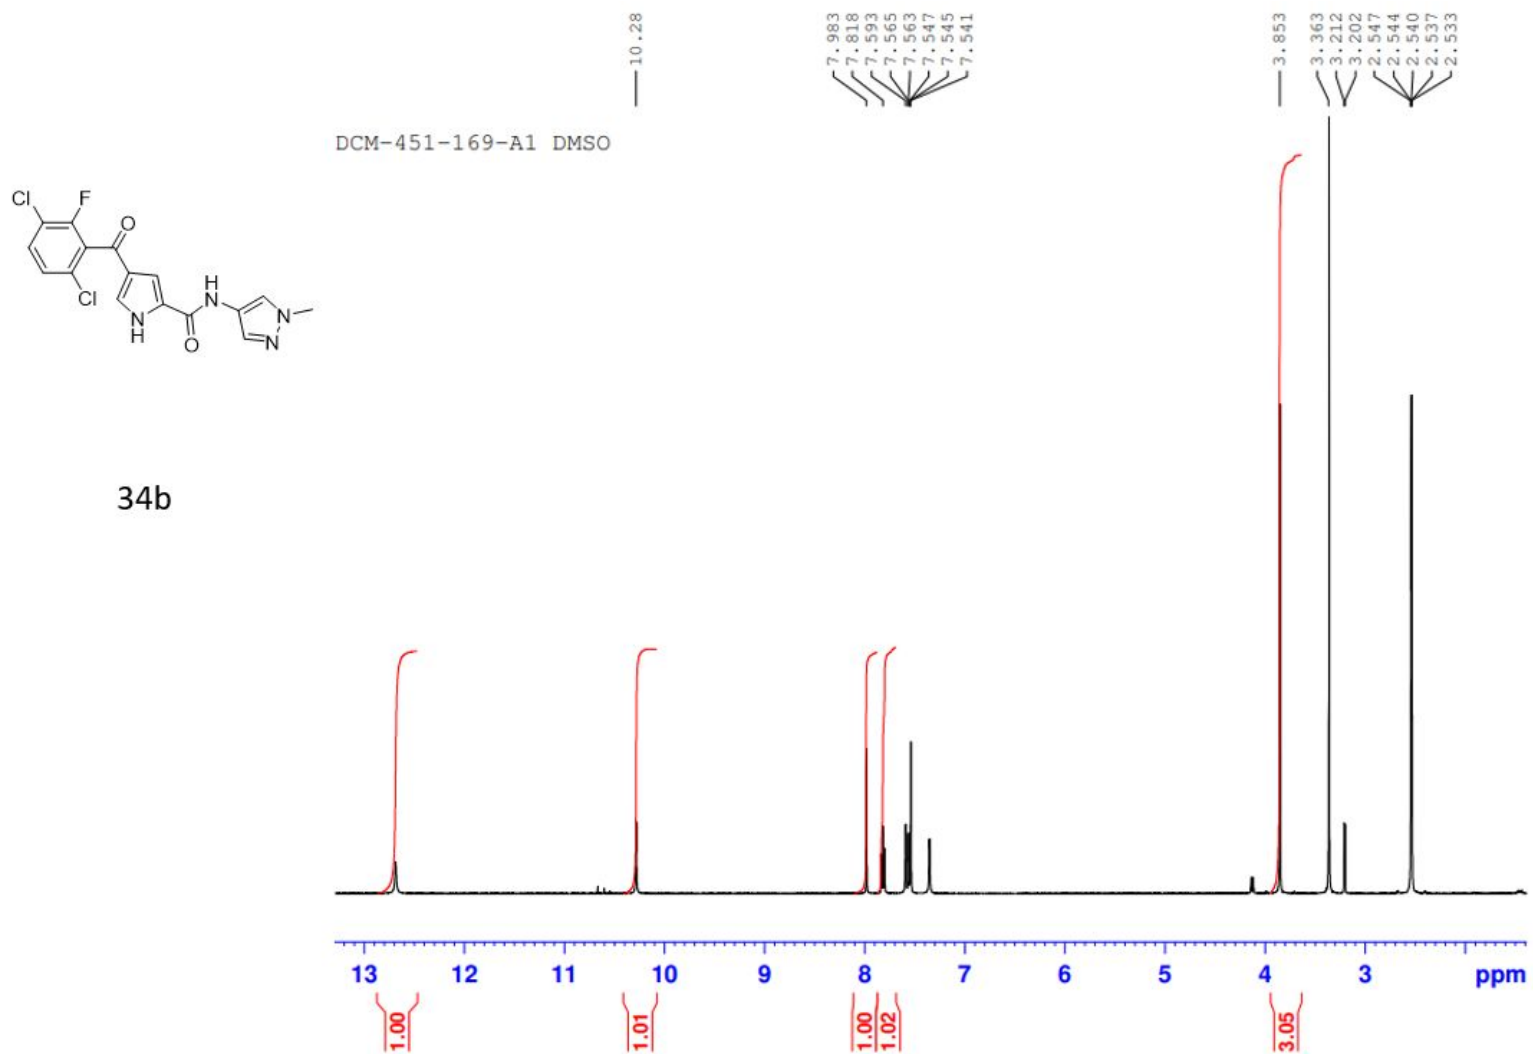

Figure S35: <sup>13</sup>C NMR spectrum of compound **34b**

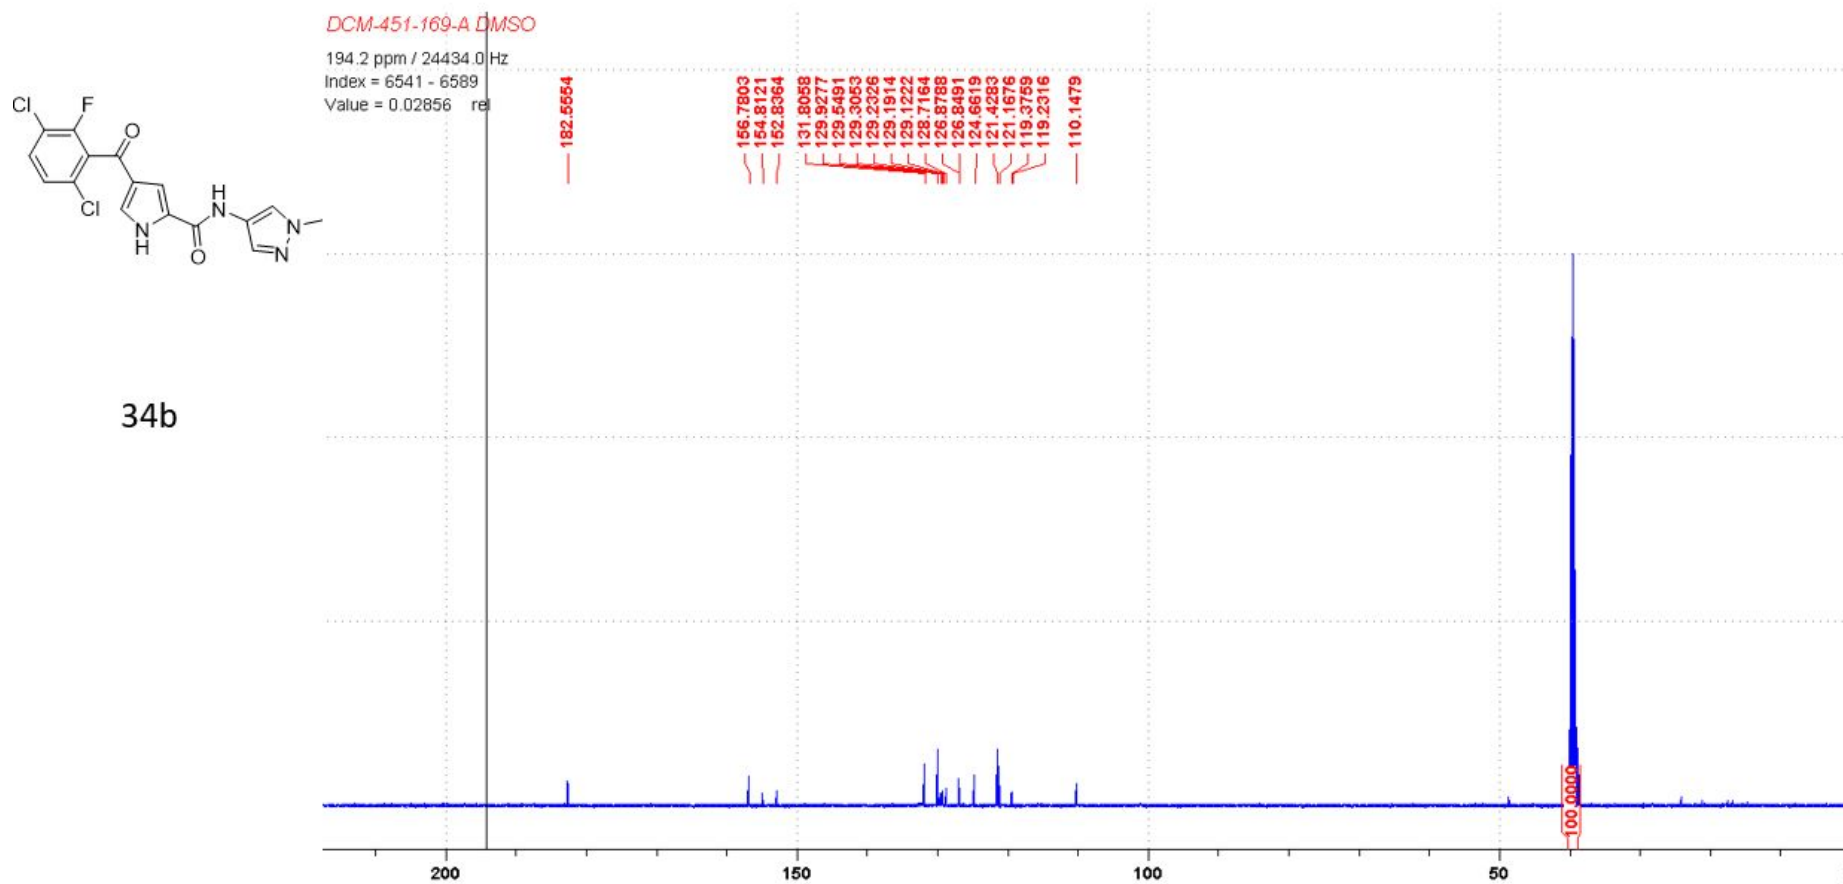

Figure S36: HPLC purity assessment of compound **34b**

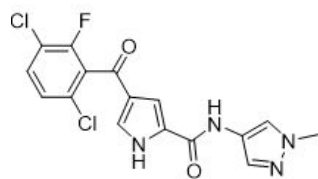

**34b**

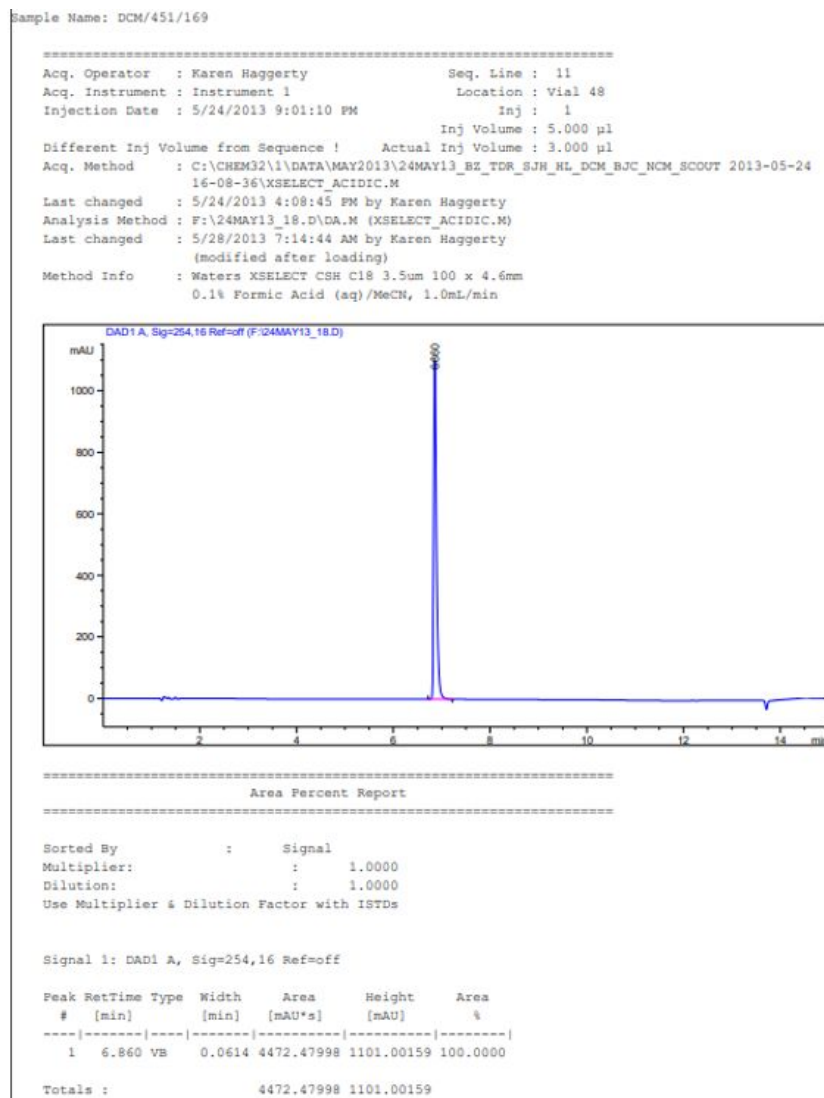

Figure S37: <sup>1</sup>H NMR spectrum of compound **34c**

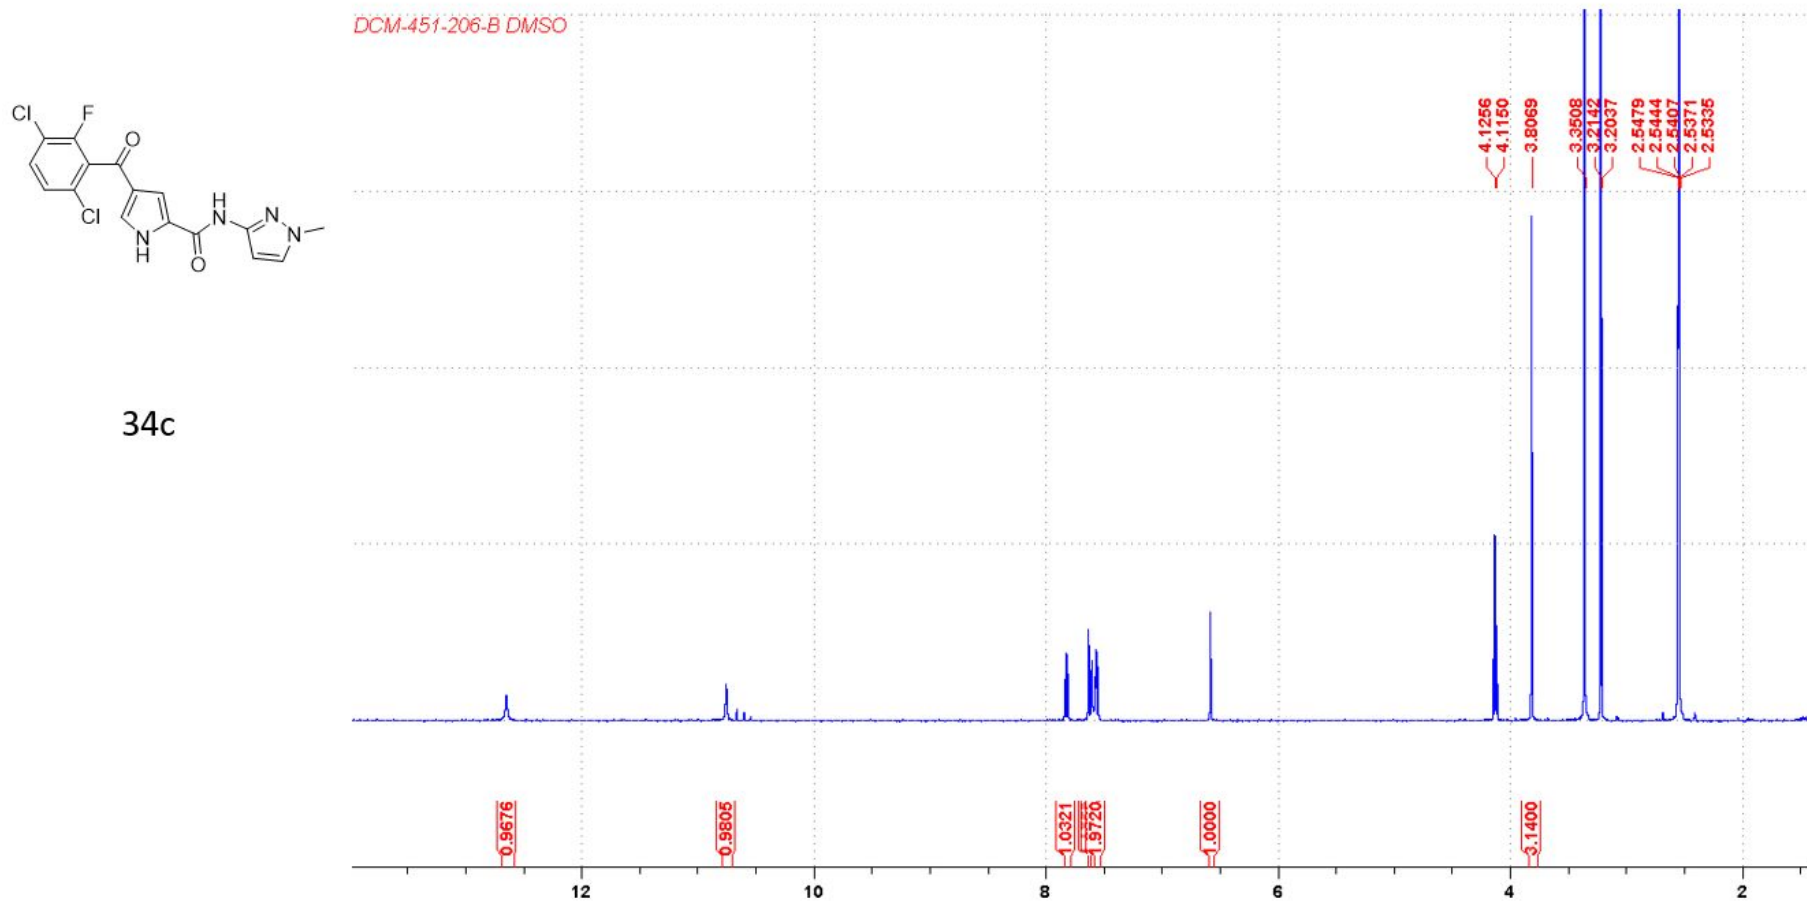



Figure S38: <sup>1</sup>H NMR spectrum of compound **34d**

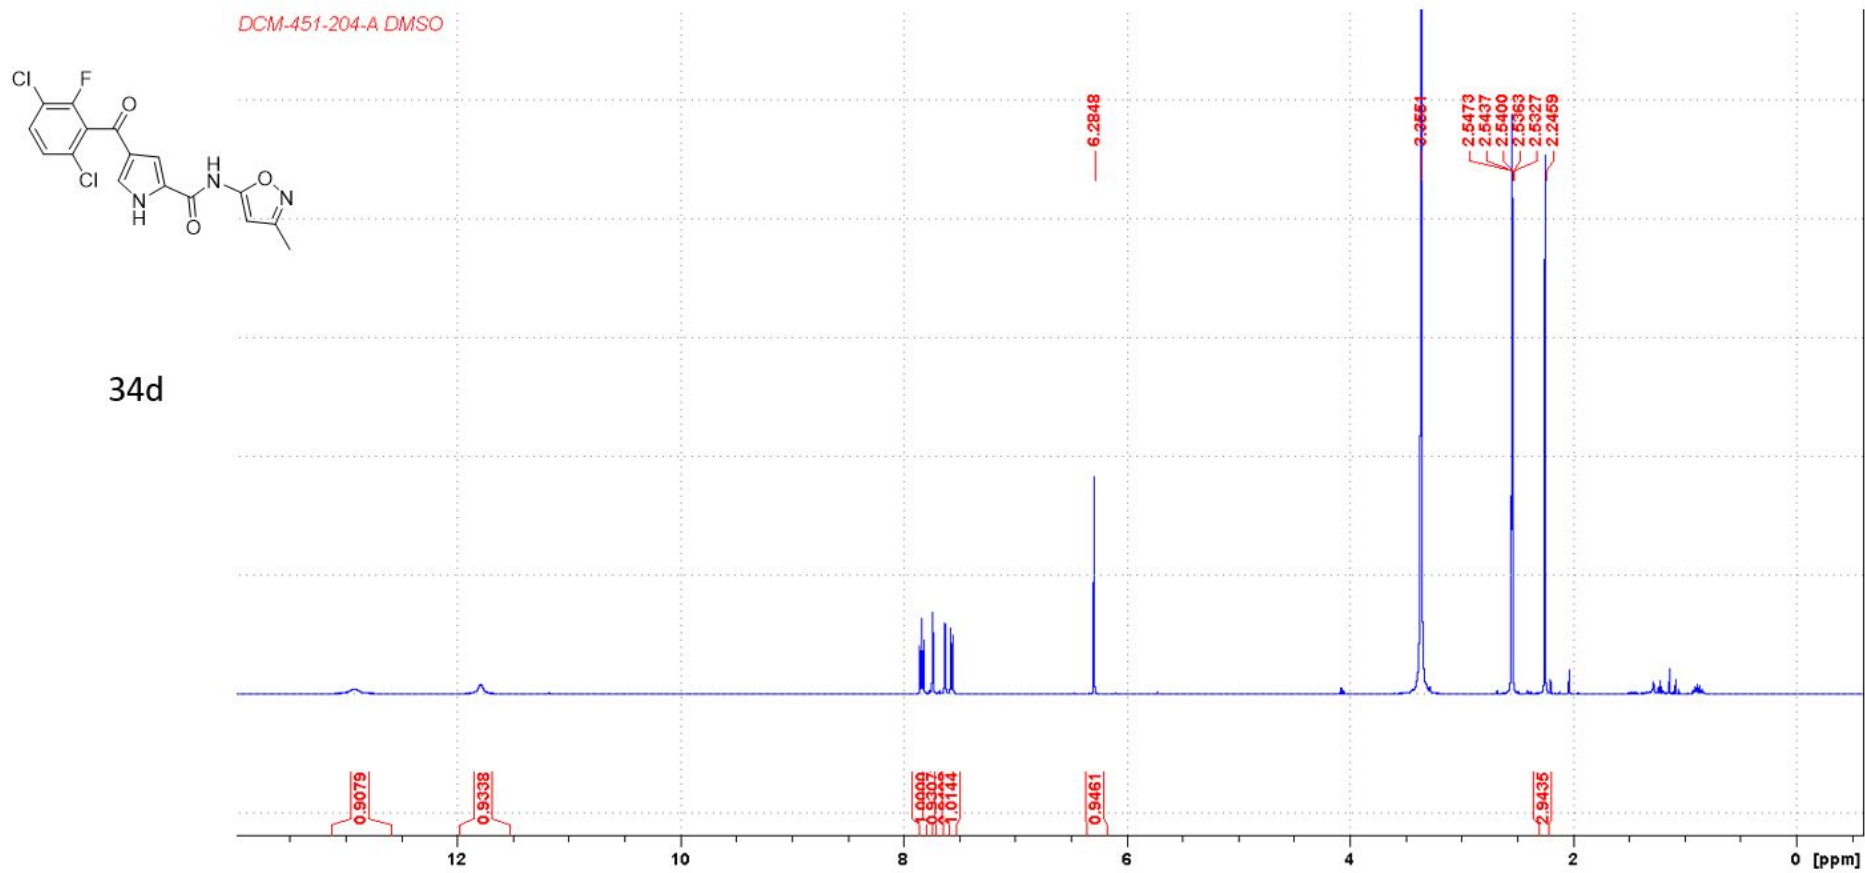

Figure S39: <sup>13</sup>C NMR spectrum of compound **34d**

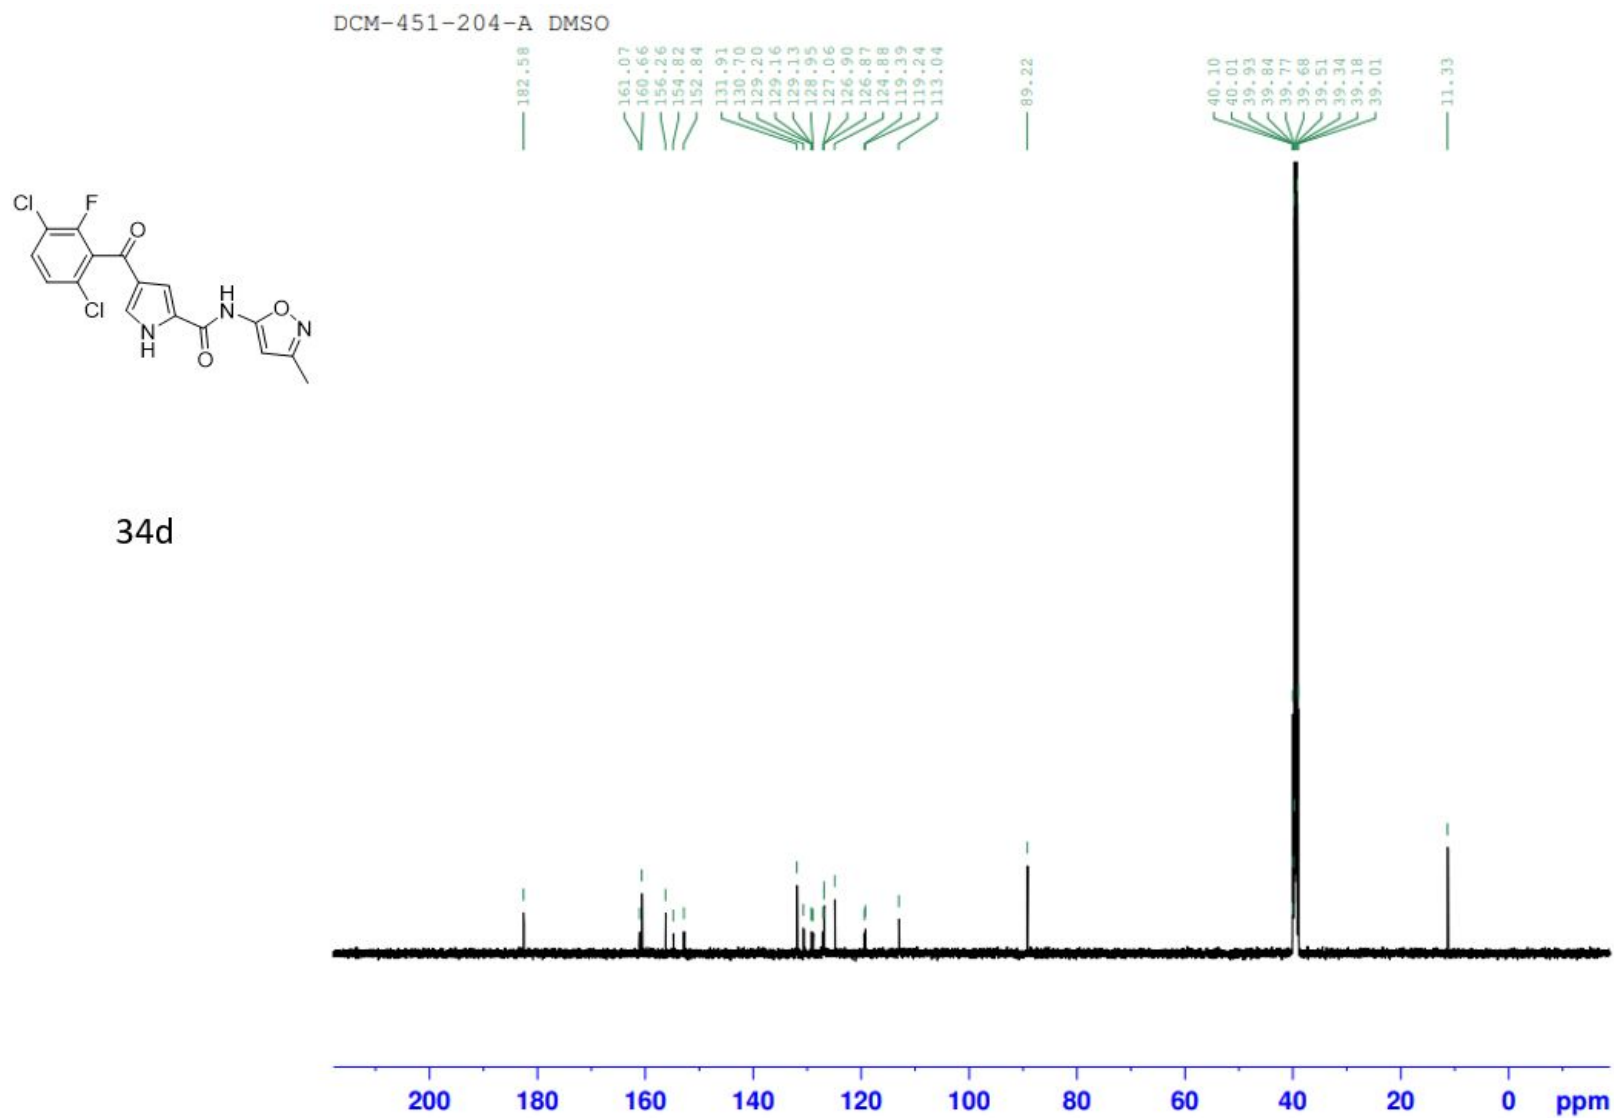

Figure S40: <sup>1</sup>H NMR spectrum of compound **34e**

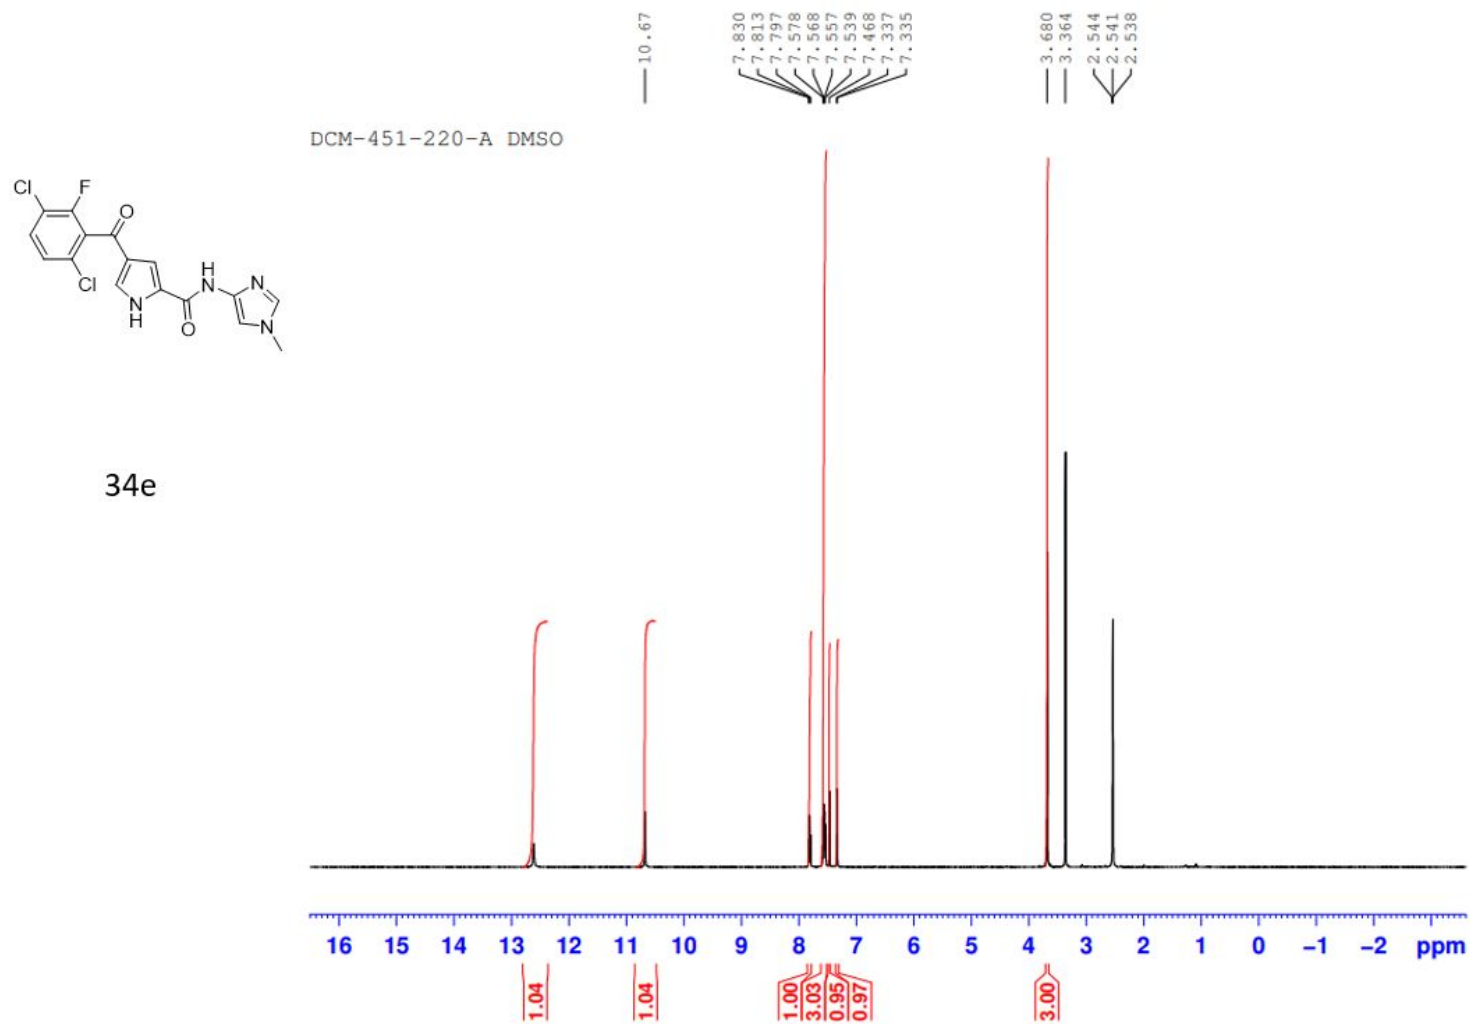

Figure S41: <sup>13</sup>C NMR spectrum of compound **34e**

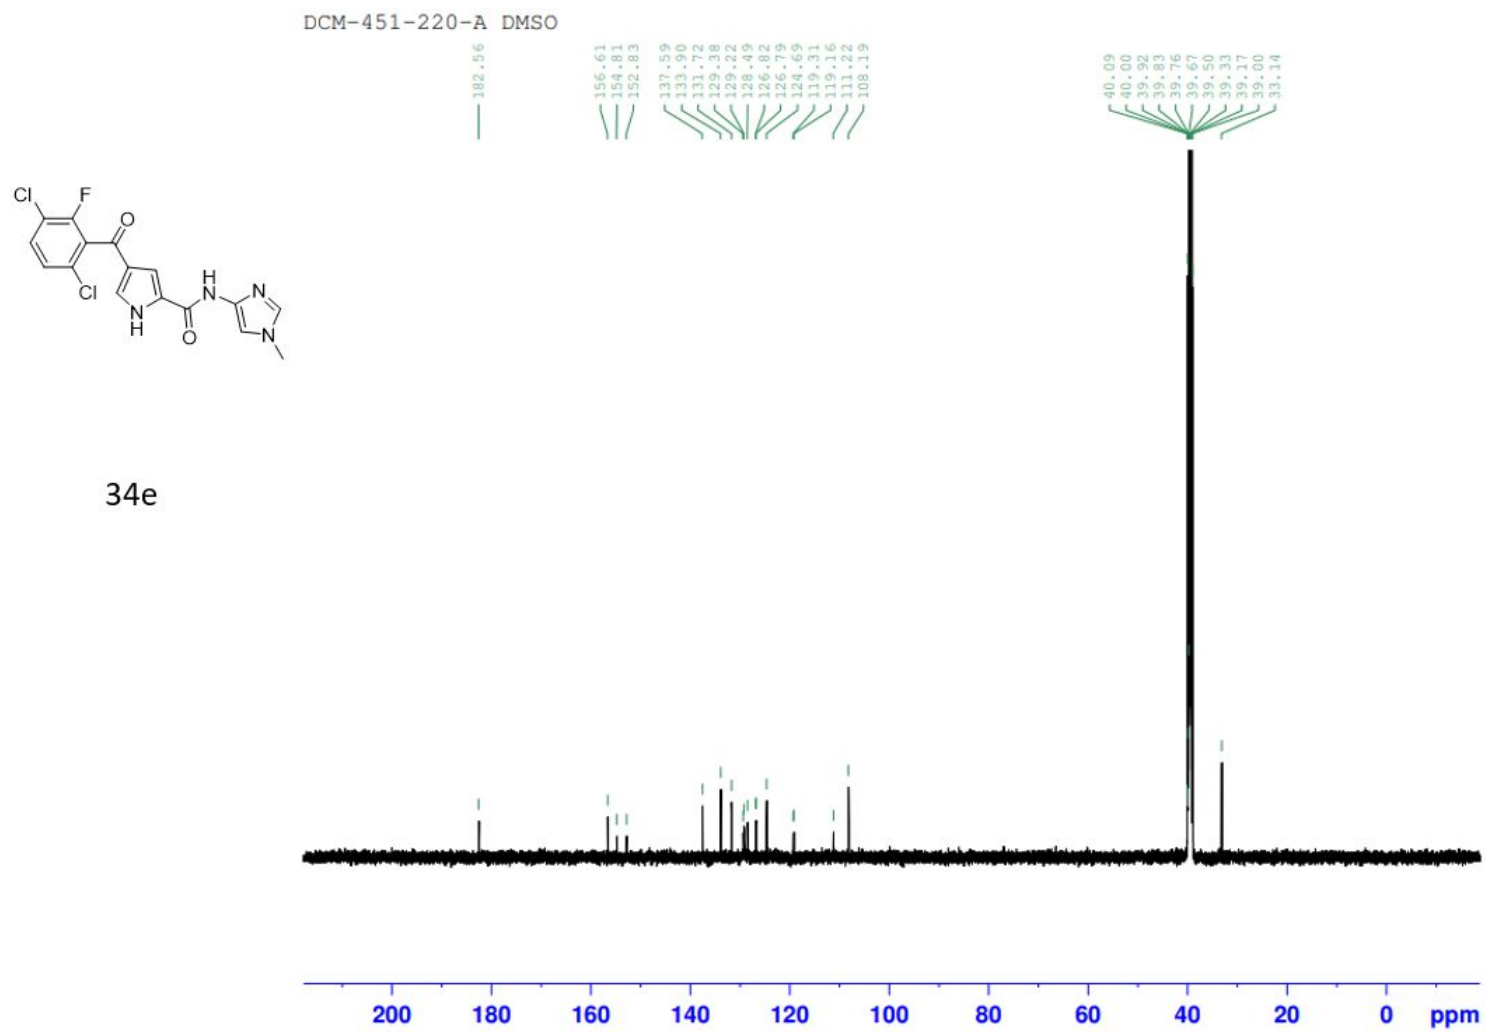

Figure S42: <sup>1</sup>H NMR spectrum of compound **34h**

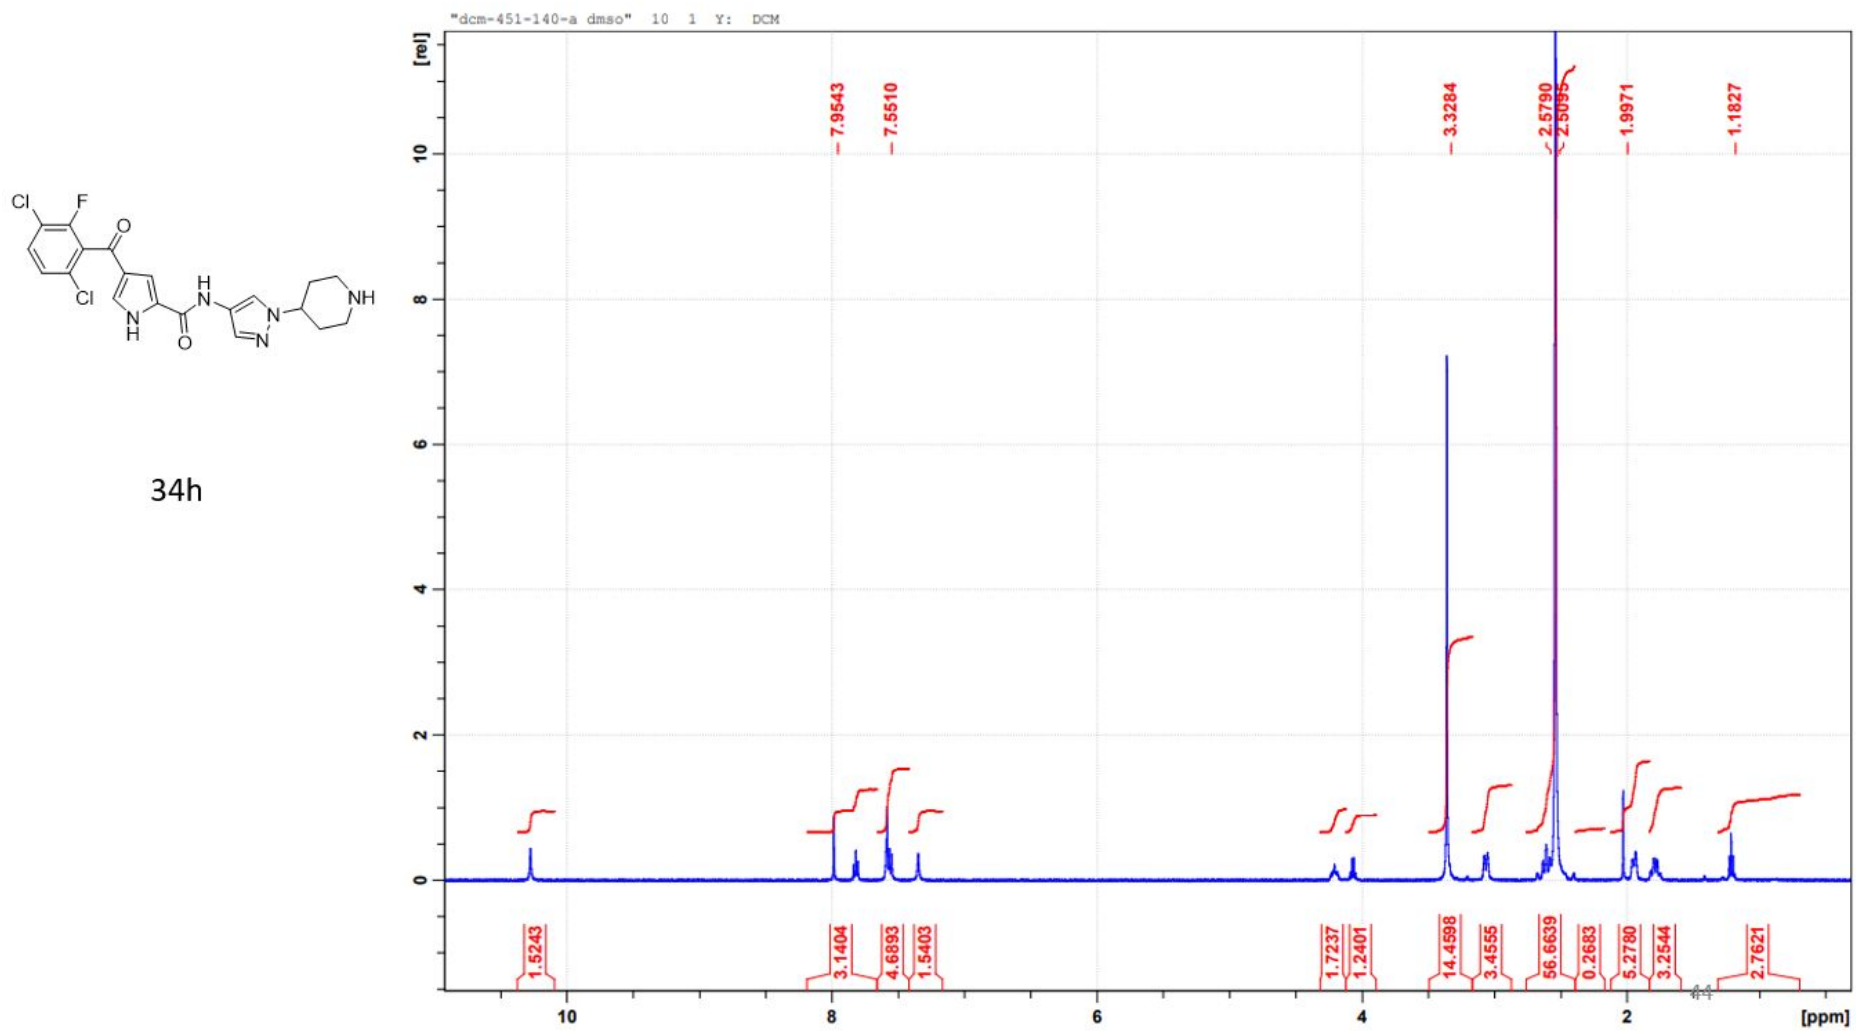

Figure S43: <sup>13</sup>C NMR spectrum of compound **34h**

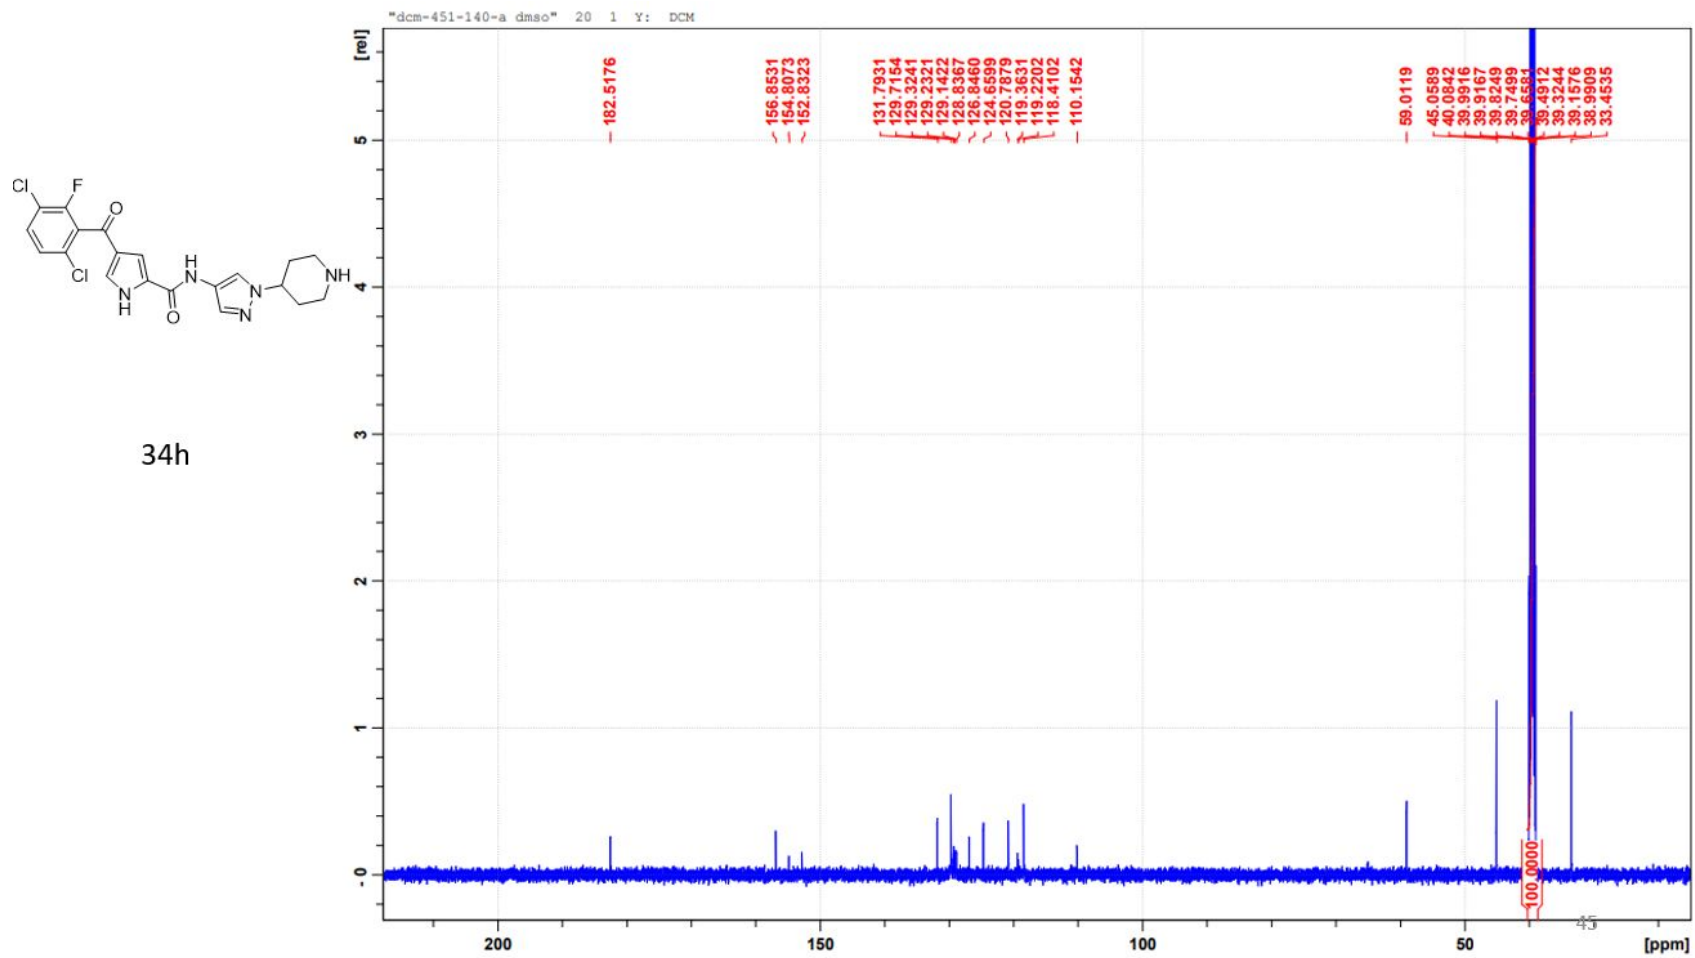

Figure S44: HPLC purity assessment of compound **34b**

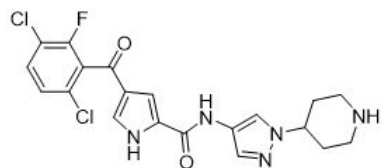

**34h**

```

Data File F:\09APR13_09.D
Sample Name: DCM/451/140/A

=====
Acq. Operator   : Karen Haggerty           Seq. Line :    7
Acq. Instrument : Instrument 1             Location  : Vial 3
Injection Date  : 4/10/2013 6:15:20 PM      Inj       :    1
                                           Inj Volume: 5.000 µl
Different Inj Volume from Sequence !      Actual Inj Volume : 4.000 µl
Acq. Method    : C:\CHEM32\1\DATA\APR2013\10APR13_HL_BJC_DCM_BE_SA 2013-04-10 15-53-10\
                                           XSELECT_ACIDIC.M
Last changed   : 4/10/2013 3:53:18 PM by Karen Haggerty
Analysis Method : F:\09APR13_09.D\DA.M (XSELECT_ACIDIC.M)
Last changed   : 4/11/2013 8:00:45 AM by Karen Haggerty
                                           (modified after loading)
Method Info    : Waters XSELECT CSH C18 3.5µm 100 x 4.6mm
                                           0.1% Formic Acid (aq)/MeCN, 1.0mL/min
    
```

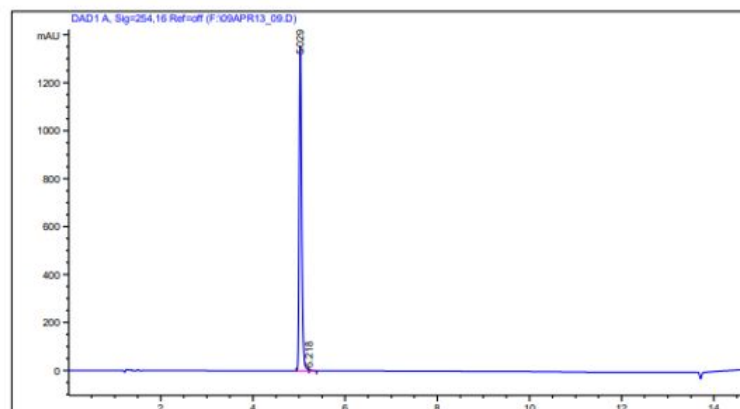

=====  
 Area Percent Report  
 =====

```

Sorted By      :      Signal
Multiplier:    :      1.0000
Dilution:      :      1.0000
Use Multiplier & Dilution Factor with ISTDs
    
```

Signal 1: DAD1 A, Sig=254,16 Ref=off

| Peak # | RetTime [min] | Type | Width [min] | Area [mAU*s] | Height [mAU] | Area %  |
|--------|---------------|------|-------------|--------------|--------------|---------|
| 1      | 5.029         | FM   | 0.0618      | 5047.23096   | 1361.69678   | 99.7055 |
| 2      | 5.218         | FM   | 0.0564      | 14.90839     | 4.40299      | 0.2945  |

Figure S45: <sup>1</sup>H NMR spectrum of compound **34i**

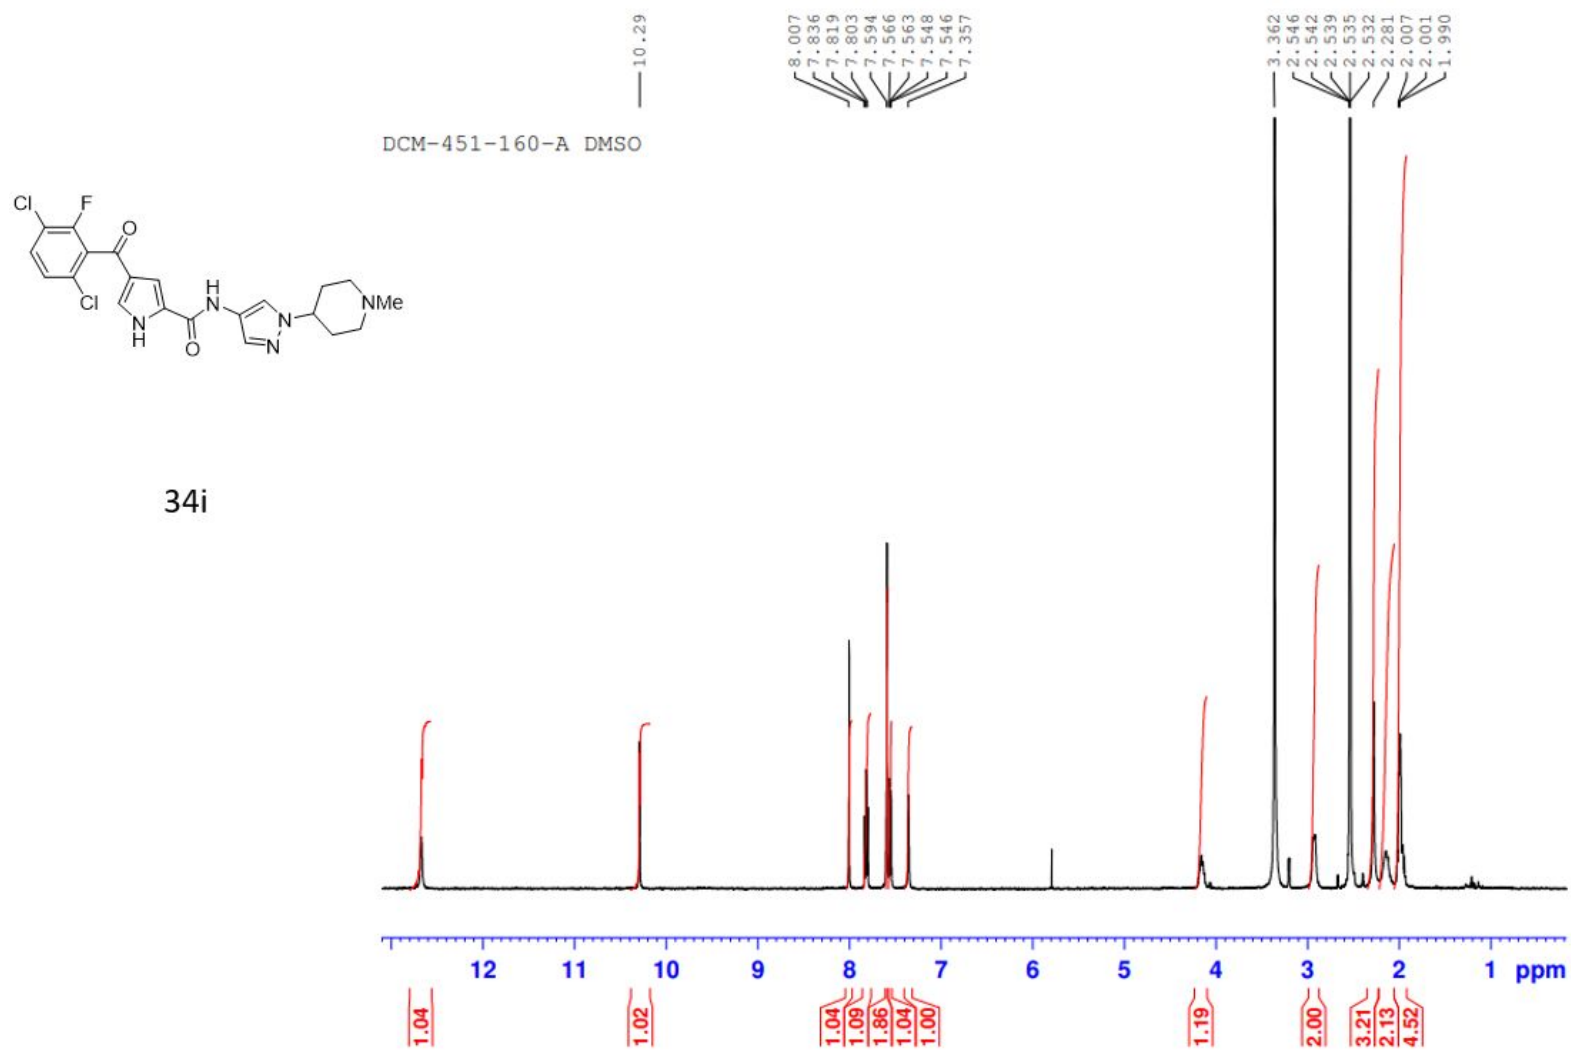



Figure S46: <sup>13</sup>C NMR spectrum of compound **34i**

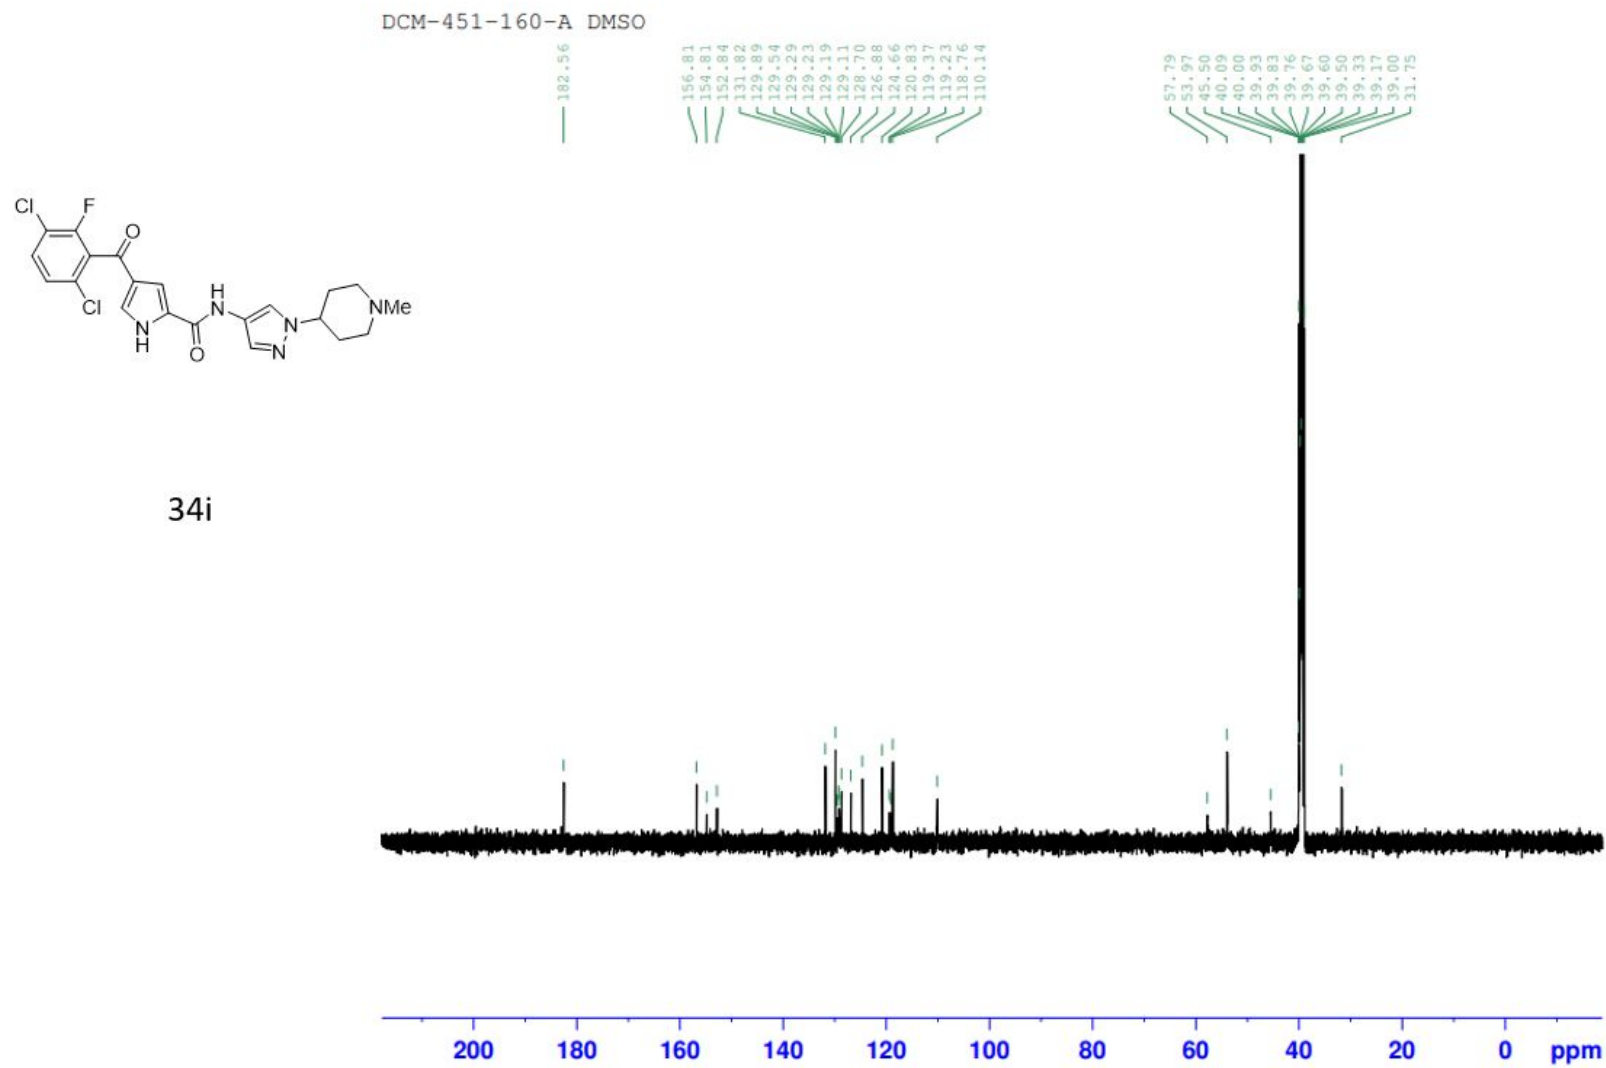

Figure S47: <sup>1</sup>H NMR spectrum of compound **34j**

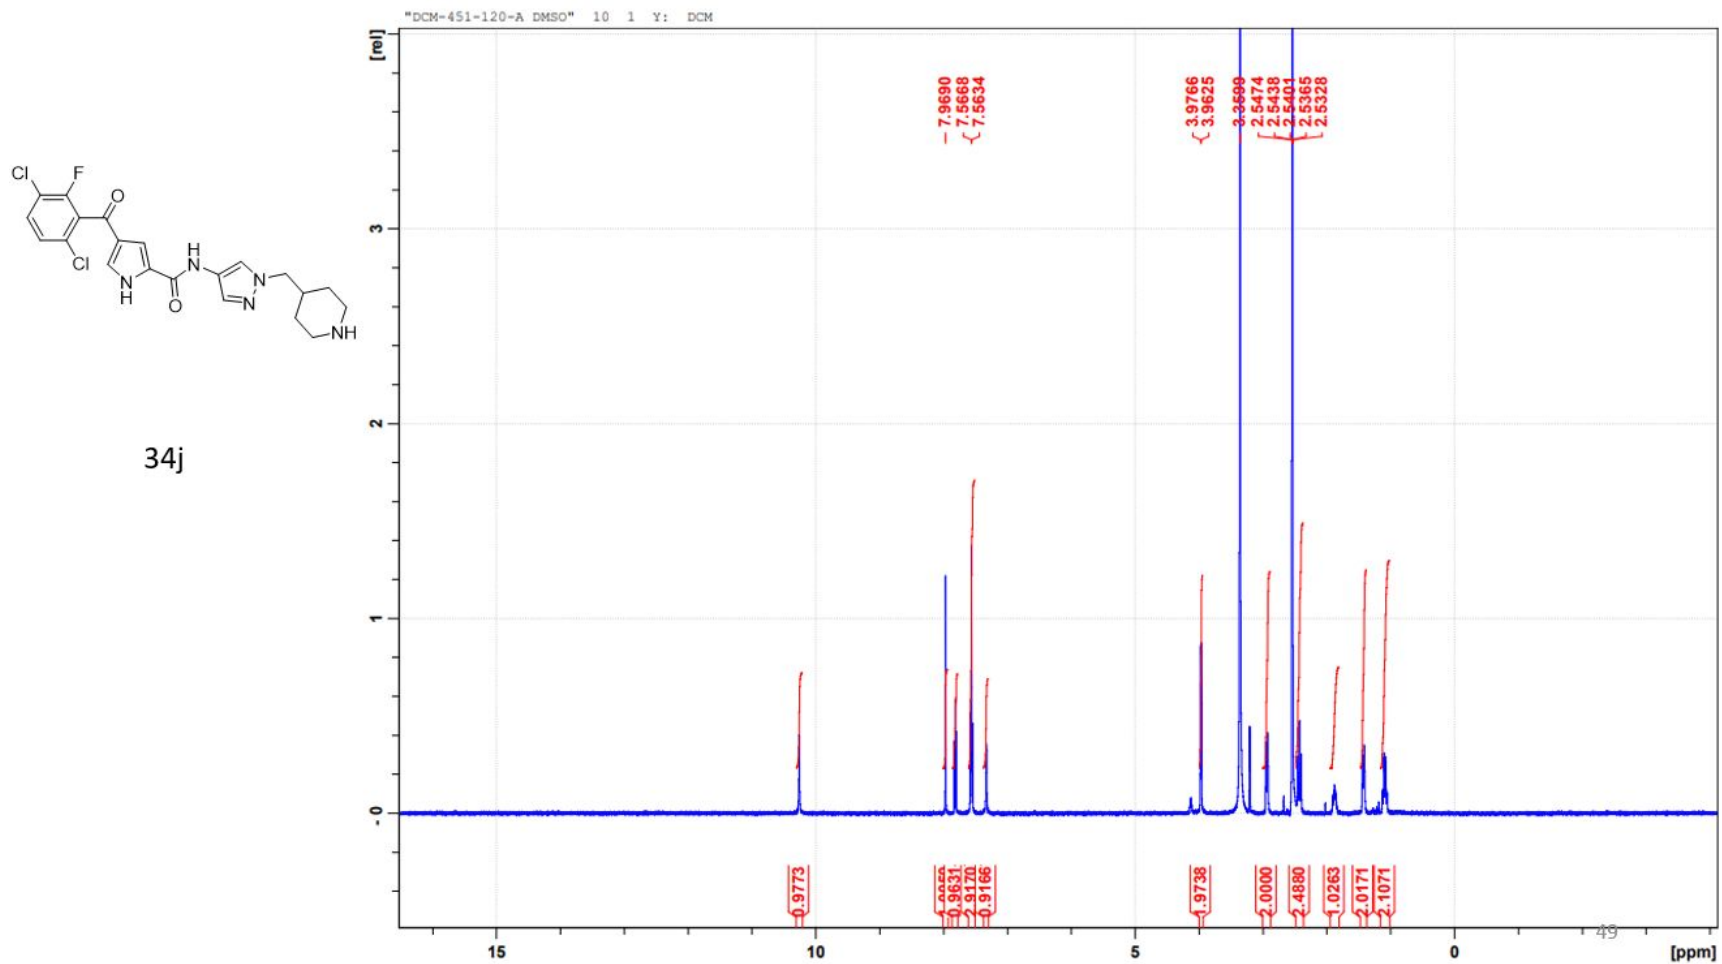

Figure S48: <sup>13</sup>C NMR spectrum of compound **34j**

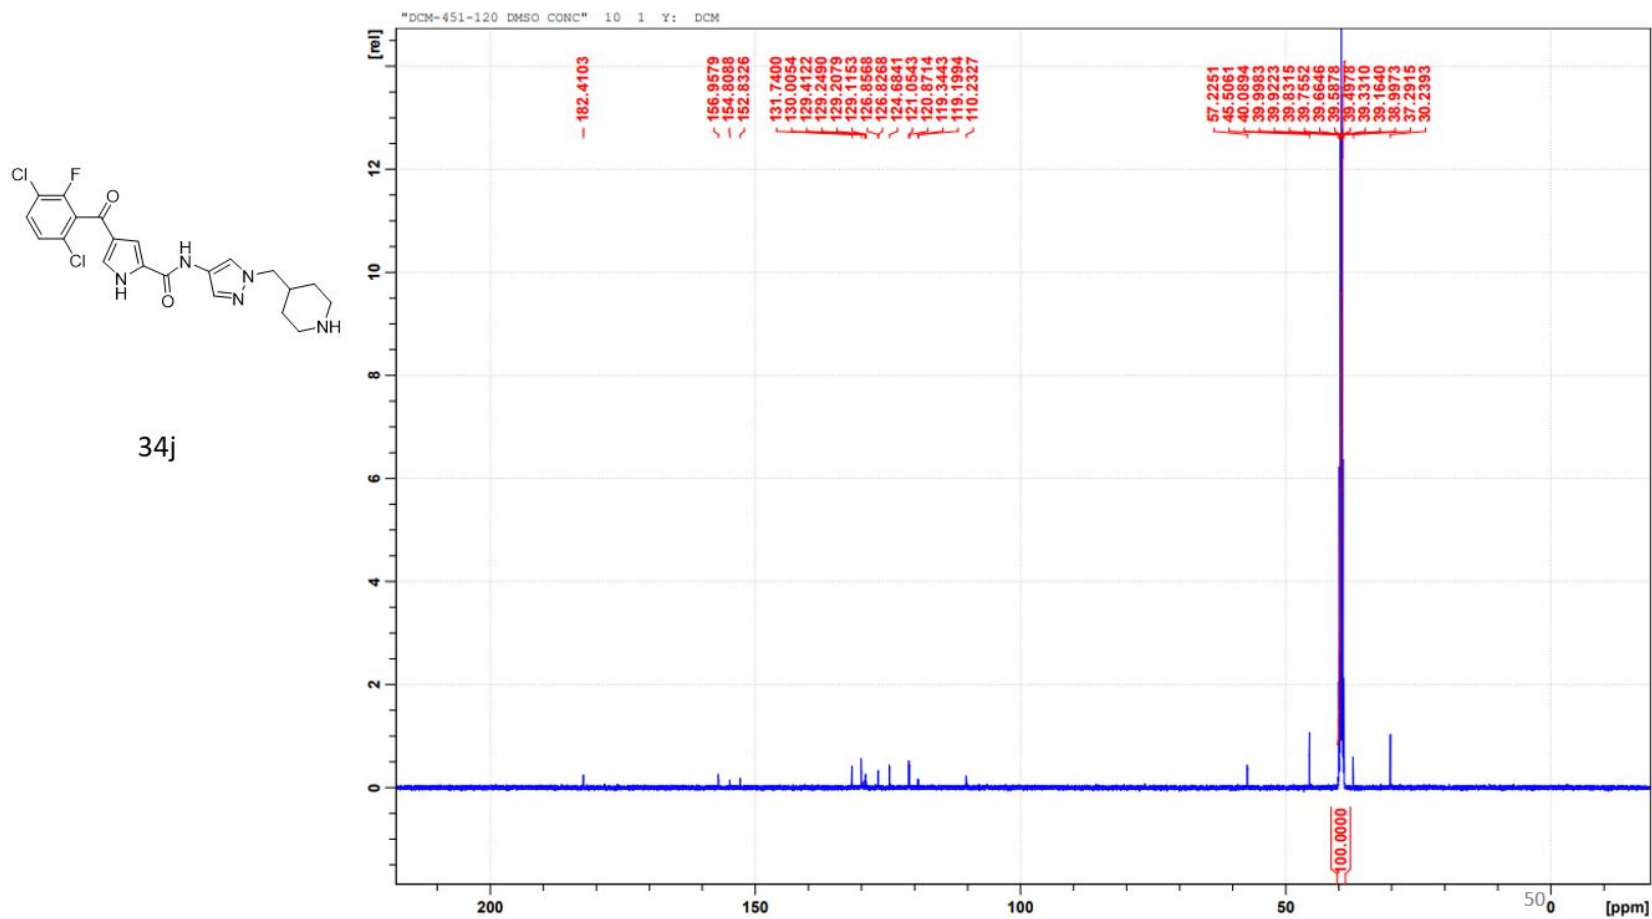

Figure S49: <sup>1</sup>H NMR spectrum of compound **34k**

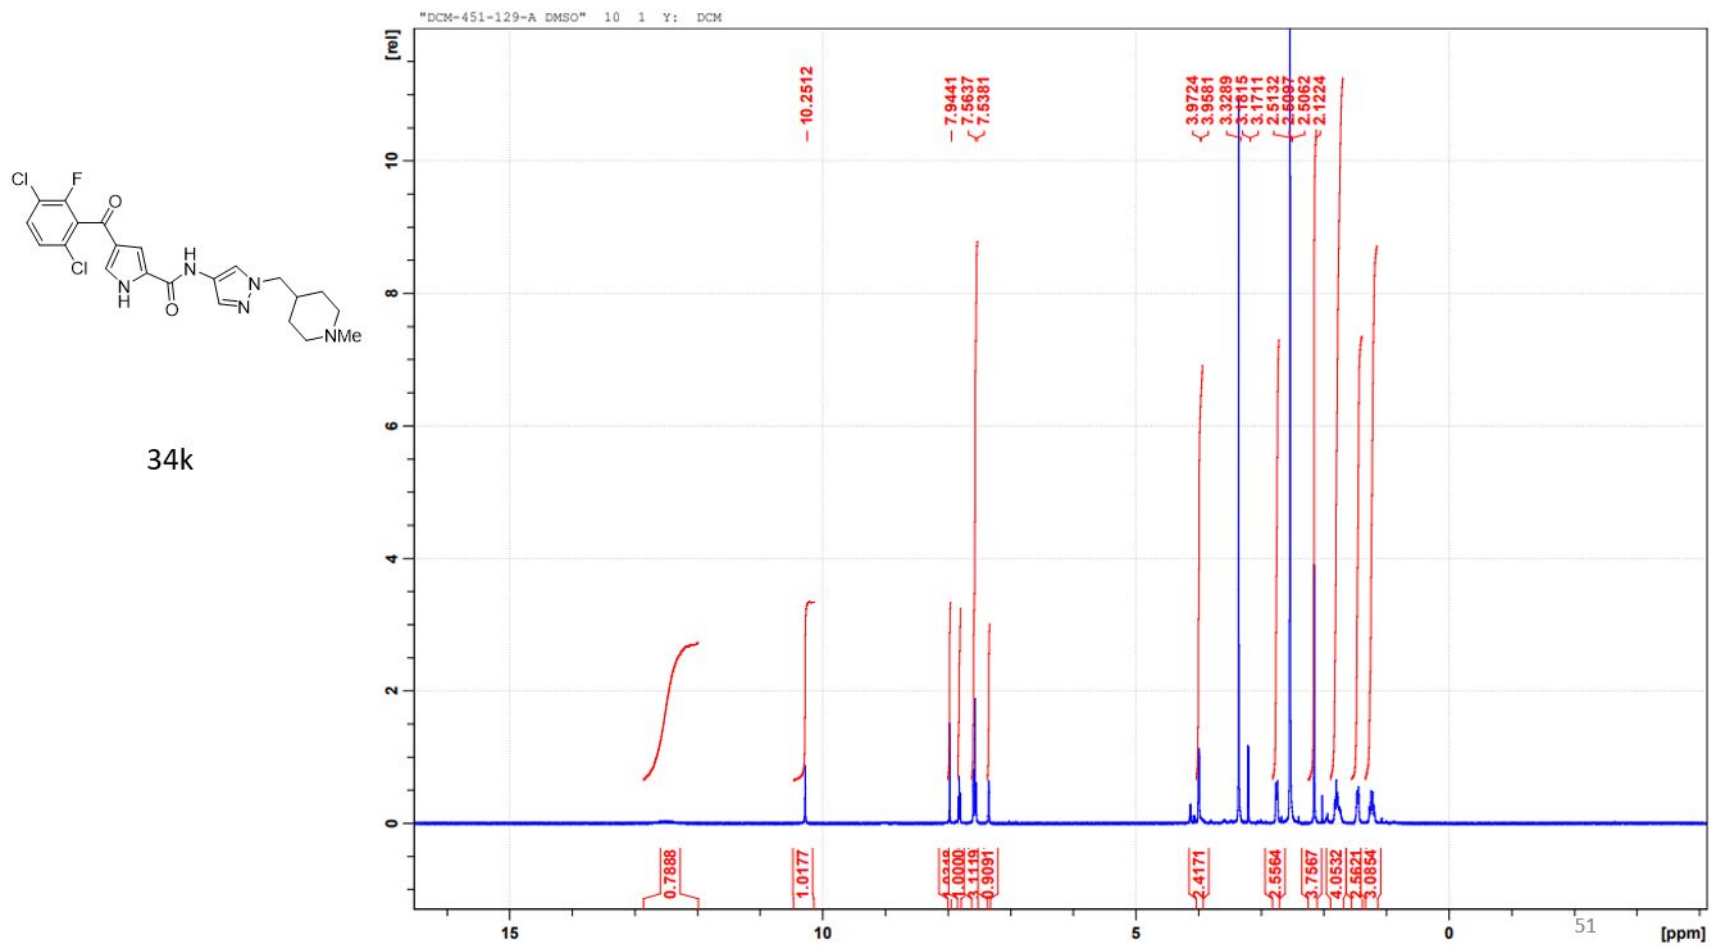

Table S1: Kinome Selectivity Data for Compound **34b**

Kinome panel selectivity screening was performed at DiscoverX using their kinomescan screen.

| DiscoverX Gene Symbol         | Percent Control | Compound Concentration (nM) |
|-------------------------------|-----------------|-----------------------------|
| AAK1                          | 56              | 10000                       |
| ABL1(E255K)-phosphorylated    | 17              | 10000                       |
| ABL1(F317I)-nonphosphorylated | 100             | 10000                       |
| ABL1(F317I)-phosphorylated    | 95              | 10000                       |
| ABL1(F317L)-nonphosphorylated | 100             | 10000                       |
| ABL1(F317L)-phosphorylated    | 78              | 10000                       |
| ABL1(H396P)-nonphosphorylated | 49              | 10000                       |
| ABL1(H396P)-phosphorylated    | 32              | 10000                       |
| ABL1(M351T)-phosphorylated    | 30              | 10000                       |
| ABL1(Q252H)-nonphosphorylated | 25              | 10000                       |
| ABL1(Q252H)-phosphorylated    | 29              | 10000                       |
| ABL1(T315I)-nonphosphorylated | 16              | 10000                       |
| ABL1(T315I)-phosphorylated    | 3.4             | 10000                       |
| ABL1(Y253F)-phosphorylated    | 29              | 10000                       |
| ABL1-nonphosphorylated        | 24              | 10000                       |
| ABL1-phosphorylated           | 34              | 10000                       |
| ABL2                          | 70              | 10000                       |
| ACVR1                         | 100             | 10000                       |
| ACVR1B                        | 94              | 10000                       |
| ACVR2A                        | 88              | 10000                       |
| ACVR2B                        | 78              | 10000                       |
| ACVRL1                        | 100             | 10000                       |
| ADCK3                         | 100             | 10000                       |
| ADCK4                         | 92              | 10000                       |
| AKT1                          | 100             | 10000                       |
| AKT2                          | 100             | 10000                       |
| AKT3                          | 100             | 10000                       |
| ALK                           | 13              | 10000                       |
| AMPK-alpha1                   | 13              | 10000                       |
| AMPK-alpha2                   | 11              | 10000                       |
| ANKK1                         | 63              | 10000                       |
| ARK5                          | 64              | 10000                       |
| ASK1                          | 94              | 10000                       |
| ASK2                          | 100             | 10000                       |
| AURKA                         | 1               | 10000                       |
| AURKB                         | 15              | 10000                       |
| AURKC                         | 9               | 10000                       |
| AXL                           | 6.8             | 10000                       |
| BIKE                          | 88              | 10000                       |
| BLK                           | 9               | 10000                       |
| BMPR1A                        | 99              | 10000                       |

|                     |     |       |
|---------------------|-----|-------|
| BMPR1B              | 67  | 10000 |
| BMPR2               | 82  | 10000 |
| BMX                 | 100 | 10000 |
| BRAF                | 85  | 10000 |
| BRAF(V600E)         | 86  | 10000 |
| BRK                 | 100 | 10000 |
| BRSK1               | 13  | 10000 |
| BRSK2               | 6.2 | 10000 |
| BTK                 | 100 | 10000 |
| BUB1                | 22  | 10000 |
| CAMK1               | 100 | 10000 |
| CAMK1D              | 100 | 10000 |
| CAMK1G              | 66  | 10000 |
| CAMK2A              | 14  | 10000 |
| CAMK2B              | 14  | 10000 |
| CAMK2D              | 13  | 10000 |
| CAMK2G              | 24  | 10000 |
| CAMK4               | 100 | 10000 |
| CAMKK1              | 57  | 10000 |
| CAMKK2              | 50  | 10000 |
| CASK                | 23  | 10000 |
| CDC2L1              | 86  | 10000 |
| CDC2L2              | 94  | 10000 |
| CDC2L5              | 96  | 10000 |
| CDK11               | 100 | 10000 |
| CDK2                | 69  | 10000 |
| CDK3                | 93  | 10000 |
| CDK4-cyclinD1       | 89  | 10000 |
| CDK4-cyclinD3       | 100 | 10000 |
| CDK5                | 100 | 10000 |
| CDK7                | 16  | 10000 |
| CDK8                | 98  | 10000 |
| CDK9                | 83  | 10000 |
| CDKL1               | 79  | 10000 |
| CDKL2               | 100 | 10000 |
| CDKL3               | 100 | 10000 |
| CDKL5               | 100 | 10000 |
| CHEK1               | 8   | 10000 |
| CHEK2               | 45  | 10000 |
| CIT                 | 100 | 10000 |
| CLK1                | 100 | 10000 |
| CLK2                | 22  | 10000 |
| CLK3                | 57  | 10000 |
| CLK4                | 100 | 10000 |
| CSF1R               | 0.3 | 10000 |
| CSF1R-autoinhibited | 12  | 10000 |
| CSK                 | 83  | 10000 |
| CSNK1A1             | 100 | 10000 |

|                           |      |       |
|---------------------------|------|-------|
| CSNK1A1L                  | 100  | 10000 |
| CSNK1D                    | 84   | 10000 |
| CSNK1E                    | 59   | 10000 |
| CSNK1G1                   | 78   | 10000 |
| CSNK1G2                   | 100  | 10000 |
| CSNK1G3                   | 100  | 10000 |
| CSNK2A1                   | 74   | 10000 |
| CSNK2A2                   | 100  | 10000 |
| CTK                       | 100  | 10000 |
| DAPK1                     | 79   | 10000 |
| DAPK2                     | 47   | 10000 |
| DAPK3                     | 56   | 10000 |
| DCAMKL1                   | 2.4  | 10000 |
| DCAMKL2                   | 3.6  | 10000 |
| DCAMKL3                   | 0.35 | 10000 |
| DDR1                      | 0.45 | 10000 |
| DDR2                      | 31   | 10000 |
| DLK                       | 100  | 10000 |
| DMPK                      | 60   | 10000 |
| DMPK2                     | 100  | 10000 |
| DRAK1                     | 49   | 10000 |
| DRAK2                     | 72   | 10000 |
| DYRK1A                    | 91   | 10000 |
| DYRK1B                    | 66   | 10000 |
| DYRK2                     | 91   | 10000 |
| EGFR                      | 66   | 10000 |
| EGFR(E746-A750del)        | 97   | 10000 |
| EGFR(G719C)               | 100  | 10000 |
| EGFR(G719S)               | 100  | 10000 |
| EGFR(L747-E749del, A750P) | 78   | 10000 |
| EGFR(L747-S752del, P753S) | 88   | 10000 |
| EGFR(L747-T751del,Sins)   | 97   | 10000 |
| EGFR(L858R)               | 84   | 10000 |
| EGFR(L858R,T790M)         | 96   | 10000 |
| EGFR(L861Q)               | 100  | 10000 |
| EGFR(S752-I759del)        | 100  | 10000 |
| EGFR(T790M)               | 100  | 10000 |
| EIF2AK1                   | 91   | 10000 |
| EPHA1                     | 100  | 10000 |
| EPHA2                     | 100  | 10000 |
| EPHA3                     | 42   | 10000 |
| EPHA4                     | 100  | 10000 |
| EPHA5                     | 100  | 10000 |
| EPHA6                     | 100  | 10000 |
| EPHA7                     | 100  | 10000 |
| EPHA8                     | 94   | 10000 |
| EPHB1                     | 99   | 10000 |
| EPHB2                     | 71   | 10000 |

|                       |     |       |
|-----------------------|-----|-------|
| EPHB3                 | 100 | 10000 |
| EPHB4                 | 100 | 10000 |
| EPHB6                 | 67  | 10000 |
| ERBB2                 | 86  | 10000 |
| ERBB3                 | 100 | 10000 |
| ERBB4                 | 100 | 10000 |
| ERK1                  | 100 | 10000 |
| ERK2                  | 100 | 10000 |
| ERK3                  | 100 | 10000 |
| ERK4                  | 73  | 10000 |
| ERK5                  | 0.3 | 10000 |
| ERK8                  | 100 | 10000 |
| ERN1                  | 43  | 10000 |
| FAK                   | 76  | 10000 |
| FER                   | 100 | 10000 |
| FES                   | 100 | 10000 |
| FGFR1                 | 4.6 | 10000 |
| FGFR2                 | 7.2 | 10000 |
| FGFR3                 | 8.5 | 10000 |
| FGFR3(G697C)          | 9.2 | 10000 |
| FGFR4                 | 51  | 10000 |
| FGR                   | 55  | 10000 |
| FLT1                  | 19  | 10000 |
| FLT3                  | 90  | 10000 |
| FLT3(D835H)           | 77  | 10000 |
| FLT3(D835Y)           | 77  | 10000 |
| FLT3(ITD)             | 91  | 10000 |
| FLT3(K663Q)           | 93  | 10000 |
| FLT3(N841I)           | 50  | 10000 |
| FLT3(R834Q)           | 88  | 10000 |
| FLT3-autoinhibited    | 100 | 10000 |
| FLT4                  | 65  | 10000 |
| FRK                   | 100 | 10000 |
| FYN                   | 100 | 10000 |
| GAK                   | 59  | 10000 |
| GCN2(Kin.Dom.2,S808G) | 37  | 10000 |
| GRK1                  | 100 | 10000 |
| GRK4                  | 78  | 10000 |
| GRK7                  | 66  | 10000 |
| GSK3A                 | 100 | 10000 |
| GSK3B                 | 100 | 10000 |
| HASPIN                | 81  | 10000 |
| HCK                   | 39  | 10000 |
| HIPK1                 | 77  | 10000 |
| HIPK2                 | 99  | 10000 |
| HIPK3                 | 95  | 10000 |
| HIPK4                 | 76  | 10000 |
| HPK1                  | 15  | 10000 |



|                              |      |       |
|------------------------------|------|-------|
| HUNK                         | 100  | 10000 |
| ICK                          | 91   | 10000 |
| IGF1R                        | 100  | 10000 |
| IKK-alpha                    | 99   | 10000 |
| IKK-beta                     | 95   | 10000 |
| IKK-epsilon                  | 70   | 10000 |
| INSR                         | 83   | 10000 |
| INSRR                        | 95   | 10000 |
| IRAK1                        | 3.2  | 10000 |
| IRAK3                        | 66   | 10000 |
| IRAK4                        | 58   | 10000 |
| ITK                          | 90   | 10000 |
| JAK1(JH1domain-catalytic)    | 6.8  | 10000 |
| JAK1(JH2domain-pseudokinase) | 19   | 10000 |
| JAK2(JH1domain-catalytic)    | 0.05 | 10000 |
| JAK3(JH1domain-catalytic)    | 0    | 10000 |
| JNK1                         | 86   | 10000 |
| JNK2                         | 93   | 10000 |
| JNK3                         | 88   | 10000 |
| KIT                          | 0.3  | 10000 |
| KIT-autoinhibited            | 76   | 10000 |
| LATS1                        | 97   | 10000 |
| LATS2                        | 100  | 10000 |
| LCK                          | 29   | 10000 |
| LIMK1                        | 95   | 10000 |
| LIMK2                        | 100  | 10000 |
| LKB1                         | 74   | 10000 |
| LOK                          | 0.55 | 10000 |
| LRRK2                        | 3.2  | 10000 |
| LTK                          | 49   | 10000 |
| LYN                          | 53   | 10000 |
| LZK                          | 81   | 10000 |
| MAK                          | 94   | 10000 |
| MAP3K1                       | 66   | 10000 |
| MAP3K15                      | 61   | 10000 |
| MAP3K2                       | 0.3  | 10000 |
| MAP3K3                       | 0.8  | 10000 |
| MAP3K4                       | 100  | 10000 |
| MAP4K2                       | 5.8  | 10000 |
| MAP4K3                       | 32   | 10000 |
| MAP4K4                       | 78   | 10000 |
| MAP4K5                       | 41   | 10000 |
| MAPKAPK2                     | 99   | 10000 |
| MAPKAPK5                     | 92   | 10000 |
| MARK1                        | 54   | 10000 |
| MARK2                        | 32   | 10000 |
| MARK3                        | 13   | 10000 |
| MARK4                        | 62   | 10000 |

|             |     |       |
|-------------|-----|-------|
| MAST1       | 49  | 10000 |
| MEK1        | 85  | 10000 |
| MEK2        | 72  | 10000 |
| MEK3        | 80  | 10000 |
| MEK4        | 100 | 10000 |
| MEK5        | 18  | 10000 |
| MEK6        | 100 | 10000 |
| MELK        | 43  | 10000 |
| MERTK       | 3.6 | 10000 |
| MET         | 18  | 10000 |
| MET(M1250T) | 10  | 10000 |
| MET(Y1235D) | 51  | 10000 |
| MINK        | 35  | 10000 |
| MKK7        | 84  | 10000 |
| MKNK1       | 98  | 10000 |
| MKNK2       | 93  | 10000 |
| MLCK        | 100 | 10000 |
| MLK1        | 91  | 10000 |
| MLK2        | 83  | 10000 |
| MLK3        | 100 | 10000 |
| MRCKA       | 100 | 10000 |
| MRCKB       | 100 | 10000 |
| MST1        | 53  | 10000 |
| MST1R       | 53  | 10000 |
| MST2        | 2.8 | 10000 |
| MST3        | 27  | 10000 |
| MST4        | 38  | 10000 |
| MTOR        | 97  | 10000 |
| MUSK        | 95  | 10000 |
| MYLK        | 29  | 10000 |
| MYLK2       | 93  | 10000 |
| MYLK4       | 91  | 10000 |
| MYO3A       | 97  | 10000 |
| MYO3B       | 93  | 10000 |
| NDR1        | 85  | 10000 |
| NDR2        | 99  | 10000 |
| NEK1        | 79  | 10000 |
| NEK10       | 86  | 10000 |
| NEK11       | 94  | 10000 |
| NEK2        | 9   | 10000 |
| NEK3        | 93  | 10000 |
| NEK4        | 76  | 10000 |
| NEK5        | 90  | 10000 |
| NEK6        | 100 | 10000 |
| NEK7        | 100 | 10000 |
| NEK9        | 100 | 10000 |
| NIK         | 100 | 10000 |
| NIM1        | 100 | 10000 |

|                       |     |       |
|-----------------------|-----|-------|
| NLK                   | 100 | 10000 |
| OSR1                  | 100 | 10000 |
| p38-alpha             | 100 | 10000 |
| p38-beta              | 100 | 10000 |
| p38-delta             | 97  | 10000 |
| p38-gamma             | 100 | 10000 |
| PAK1                  | 100 | 10000 |
| PAK2                  | 55  | 10000 |
| PAK3                  | 12  | 10000 |
| PAK4                  | 63  | 10000 |
| PAK6                  | 68  | 10000 |
| PAK7                  | 45  | 10000 |
| PCK1                  | 92  | 10000 |
| PCK2                  | 97  | 10000 |
| PCK3                  | 94  | 10000 |
| PDGFRA                | 18  | 10000 |
| PDGFRB                | 3   | 10000 |
| PDPK1                 | 30  | 10000 |
| PFCDPK1(P.falciparum) | 67  | 10000 |
| PFPK5(P.falciparum)   | 94  | 10000 |
| PFTAIRE2              | 100 | 10000 |
| PFTK1                 | 81  | 10000 |
| PHKG1                 | 92  | 10000 |
| PHKG2                 | 46  | 10000 |
| PIK3C2B               | 100 | 10000 |
| PIK3C2G               | 99  | 10000 |
| PIK3CA                | 100 | 10000 |
| PIK3CA(C420R)         | 86  | 10000 |
| PIK3CA(E542K)         | 93  | 10000 |
| PIK3CA(E545A)         | 55  | 10000 |
| PIK3CA(E545K)         | 80  | 10000 |
| PIK3CA(H1047L)        | 86  | 10000 |
| PIK3CA(H1047Y)        | 46  | 10000 |
| PIK3CA(I800L)         | 100 | 10000 |
| PIK3CA(M1043I)        | 100 | 10000 |
| PIK3CA(Q546K)         | 86  | 10000 |
| PIK3CB                | 92  | 10000 |
| PIK3CD                | 100 | 10000 |
| PIK3CG                | 100 | 10000 |
| PIK4CB                | 100 | 10000 |
| PIM1                  | 94  | 10000 |
| PIM2                  | 100 | 10000 |
| PIM3                  | 92  | 10000 |
| PIP5K1A               | 78  | 10000 |
| PIP5K1C               | 49  | 10000 |
| PIP5K2B               | 92  | 10000 |
| PIP5K2C               | 100 | 10000 |
| PKAC-alpha            | 100 | 10000 |

|                               |     |       |
|-------------------------------|-----|-------|
| PKAC-beta                     | 100 | 10000 |
| PKMYT1                        | 94  | 10000 |
| PKN1                          | 43  | 10000 |
| PKN2                          | 46  | 10000 |
| PKNB(M.tuberculosis)          | 72  | 10000 |
| PLK1                          | 65  | 10000 |
| PLK2                          | 1.8 | 10000 |
| PLK3                          | 66  | 10000 |
| PLK4                          | 29  | 10000 |
| PRKCD                         | 99  | 10000 |
| PRKCE                         | 100 | 10000 |
| PRKCH                         | 100 | 10000 |
| PRKCI                         | 90  | 10000 |
| PRKCQ                         | 99  | 10000 |
| PRKD1                         | 32  | 10000 |
| PRKD2                         | 38  | 10000 |
| PRKD3                         | 58  | 10000 |
| PRKG1                         | 61  | 10000 |
| PRKG2                         | 85  | 10000 |
| PRKR                          | 80  | 10000 |
| PRKX                          | 86  | 10000 |
| PRP4                          | 100 | 10000 |
| PYK2                          | 62  | 10000 |
| QSK                           | 36  | 10000 |
| RAF1                          | 100 | 10000 |
| RET                           | 33  | 10000 |
| RET(M918T)                    | 18  | 10000 |
| RET(V804L)                    | 70  | 10000 |
| RET(V804M)                    | 91  | 10000 |
| RIOK1                         | 88  | 10000 |
| RIOK2                         | 81  | 10000 |
| RIOK3                         | 99  | 10000 |
| RIPK1                         | 100 | 10000 |
| RIPK2                         | 100 | 10000 |
| RIPK4                         | 94  | 10000 |
| RIPK5                         | 72  | 10000 |
| ROCK1                         | 67  | 10000 |
| ROCK2                         | 72  | 10000 |
| ROS1                          | 100 | 10000 |
| RPS6KA4(Kin.Dom.1-N-terminal) | 95  | 10000 |
| RPS6KA4(Kin.Dom.2-C-terminal) | 81  | 10000 |
| RPS6KA5(Kin.Dom.1-N-terminal) | 100 | 10000 |
| RPS6KA5(Kin.Dom.2-C-terminal) | 100 | 10000 |
| RSK1(Kin.Dom.1-N-terminal)    | 50  | 10000 |
| RSK1(Kin.Dom.2-C-terminal)    | 26  | 10000 |
| RSK2(Kin.Dom.1-N-terminal)    | 91  | 10000 |
| RSK2(Kin.Dom.2-C-terminal)    | 30  | 10000 |
| RSK3(Kin.Dom.1-N-terminal)    | 43  | 10000 |

|                            |     |       |
|----------------------------|-----|-------|
| RSK3(Kin.Dom.2-C-terminal) | 2.9 | 10000 |
| RSK4(Kin.Dom.1-N-terminal) | 92  | 10000 |
| RSK4(Kin.Dom.2-C-terminal) | 9.6 | 10000 |
| S6K1                       | 39  | 10000 |
| SBK1                       | 34  | 10000 |
| SGK                        | 92  | 10000 |
| SgK110                     | 53  | 10000 |
| SGK2                       | 100 | 10000 |
| SGK3                       | 95  | 10000 |
| SIK                        | 76  | 10000 |
| SIK2                       | 52  | 10000 |
| SLK                        | 0.8 | 10000 |
| SNARK                      | 33  | 10000 |
| SNRK                       | 94  | 10000 |
| SRC                        | 100 | 10000 |
| SRMS                       | 92  | 10000 |
| SRPK1                      | 73  | 10000 |
| SRPK2                      | 89  | 10000 |
| SRPK3                      | 88  | 10000 |
| STK16                      | 77  | 10000 |
| STK33                      | 69  | 10000 |
| STK35                      | 100 | 10000 |
| STK36                      | 100 | 10000 |
| STK39                      | 100 | 10000 |
| SYK                        | 100 | 10000 |
| TAK1                       | 99  | 10000 |
| TAOK1                      | 64  | 10000 |
| TAOK2                      | 5.7 | 10000 |
| TAOK3                      | 54  | 10000 |
| TBK1                       | 72  | 10000 |
| TEC                        | 100 | 10000 |
| TESK1                      | 21  | 10000 |
| TGFBR1                     | 100 | 10000 |
| TGFBR2                     | 100 | 10000 |
| TIE1                       | 20  | 10000 |
| TIE2                       | 33  | 10000 |
| TLK1                       | 77  | 10000 |
| TLK2                       | 96  | 10000 |
| TNIK                       | 33  | 10000 |
| TNK1                       | 70  | 10000 |
| TNK2                       | 96  | 10000 |
| TNNI3K                     | 92  | 10000 |
| TRKA                       | 30  | 10000 |
| TRKB                       | 18  | 10000 |
| TRKC                       | 35  | 10000 |
| TRPM6                      | 79  | 10000 |
| TSSK1B                     | 77  | 10000 |
| TTK                        | 76  | 10000 |

|                              |      |       |
|------------------------------|------|-------|
| TXK                          | 100  | 10000 |
| TYK2(JH1domain-catalytic)    | 0.05 | 10000 |
| TYK2(JH2domain-pseudokinase) | 12   | 10000 |
| TYRO3                        | 100  | 10000 |
| ULK1                         | 0.15 | 10000 |
| ULK2                         | 0.05 | 10000 |
| ULK3                         | 1.5  | 10000 |
| VEGFR2                       | 57   | 10000 |
| VRK2                         | 89   | 10000 |
| WEE1                         | 79   | 10000 |
| WEE2                         | 100  | 10000 |
| WNK1                         | 100  | 10000 |
| WNK3                         | 85   | 10000 |
| YANK1                        | 94   | 10000 |
| YANK2                        | 100  | 10000 |
| YANK3                        | 100  | 10000 |
| YES                          | 98   | 10000 |
| YSK1                         | 63   | 10000 |
| YSK4                         | 79   | 10000 |
| ZAK                          | 100  | 10000 |
| ZAP70                        | 100  | 10000 |

Table S2: Kinome Selectivity (Kd) Data for Compound **34b**

**DiscoverX Gene Symbol    Entrez Gene Symbol    Kd (nM)**

|                           |        |      |
|---------------------------|--------|------|
| ABL1-nonphosphorylated    | ABL1   | 1200 |
| AURKA                     | AURKA  | 290  |
| CSF1R                     | CSF1R  | 46   |
| DCAMKL1                   | DCLK1  | 61   |
| ERK5                      | MAPK7  | 180  |
| FGFR1                     | FGFR1  | 380  |
| JAK3(JH1domain-catalytic) | JAK3   | 1300 |
| KIT                       | KIT    | 420  |
| LRRK2                     | LRRK2  | 220  |
| MEK5                      | MAP2K5 | 2800 |

Figure S50: Cellular dependency on MAPK7 (RNAi gene silencing, DepMap)

a)

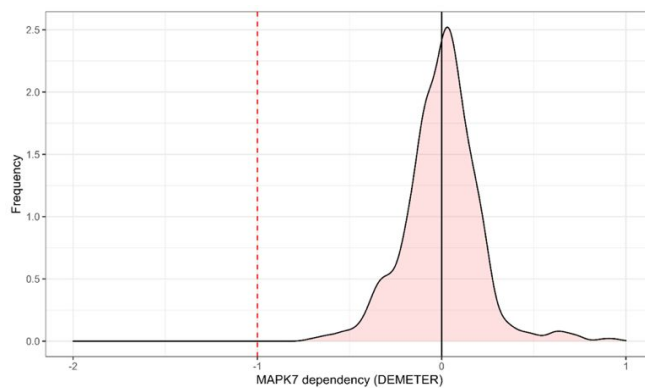

b)

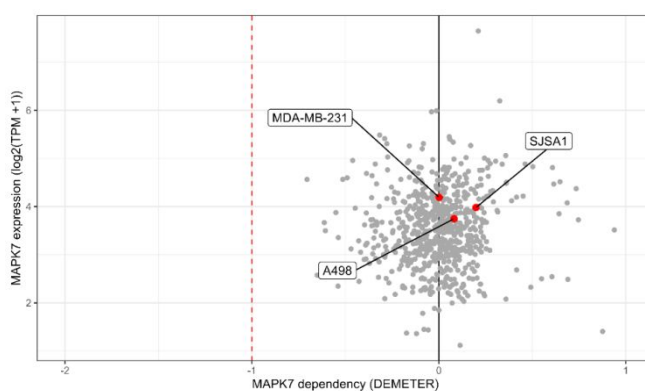

a) Distribution of DEMETER gene dependency scores (DepMap RNAi) for *MAPK7* across all cell lines.

b) Scatterplot of DEMETER gene dependency score (DepMap RNAi) and RNA expression values ( $\log_2(\text{TPM} + 1)$ ) for *MAPK7*.

Genetic dependency was assessed using combined RNA interference (RNAi) data from 660 unique tumour cell lines treated with shRNA to *MAPK7* (the gene encoding ERK5) where the effect on growth had been determined. A dependency score of zero or greater (observed with MDA-MB-231, A498, and MDA-MB-231 in response to *MAPK7* silencing) indicates that silencing of a given gene has not had an inhibitory effect on cell growth. A dependency score of  $-1$  is comparable to the median of all pan-essential genes (red dashed line). Data was downloaded from the DepMap Portal and processed through the DEMETER2 pipeline.<sup>1</sup> The mRNA expression values were taken from the DepMap 21Q4 release. All data are available at [depmap.org/portal/](http://depmap.org/portal/).

A. Improved estimation of cancer dependencies from large-scale RNAi screens using model-based normalization and data integration. *Nat. Commun.* **2018**, 9, 4610.

Figure S51: Quantification of p-ERK5 by Western blotting and densitometry

a)

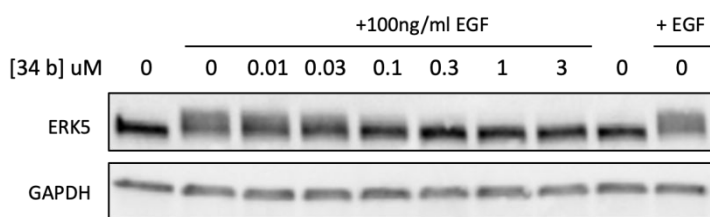

b)

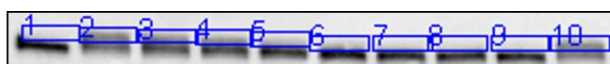

c)

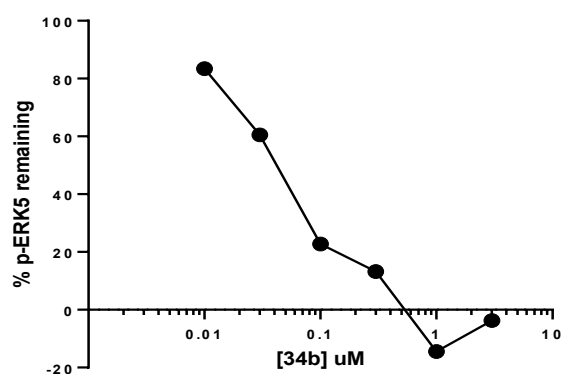

HeLa cells were serum starved overnight, treated with various concentrations of compound **34b** for 1h and then stimulated with EGF (100ng/ml) for 10 minutes. a) Western blot showing upper phospho-ERK5 band with EGF stimulation and inhibition by compound 34b, b) densitometry to quantitate upper band, c) densitometry values plotted as % p-ERK5 remaining ( $IC_{50} = 42nM$ ).

## Reference

<sup>1</sup> McFarland, J. M.; Ho, Z. V.; Kugener, G; Dempster, J. M.; Montgomery, P. G.; Bryan, J. G.; Krill-Burger, J. M., Green, T. M.; Vazquez, F; Boehm, J. S.; Golub, T. R.; Hahn, W. C.; Root, D. E.; Tsherniak,
